# Supplementary material for: Human induced pluripotent stem cells from two azoospermic patients with Klinefelter syndrome show similar X chromosome inactivation behavior to female pluripotent stem cells
Source: PubMed Central journal article supplement — Hum Reprod. 2019 Nov 19;34(11):2297–310. doi: 10.1093/humrep/dez134 (PMC6894010; doi:10.1093/humrep/dez134), 2019-11-19
Supplement: supp_f2_dez134.pdf [file supp_f2_dez134.pdf]

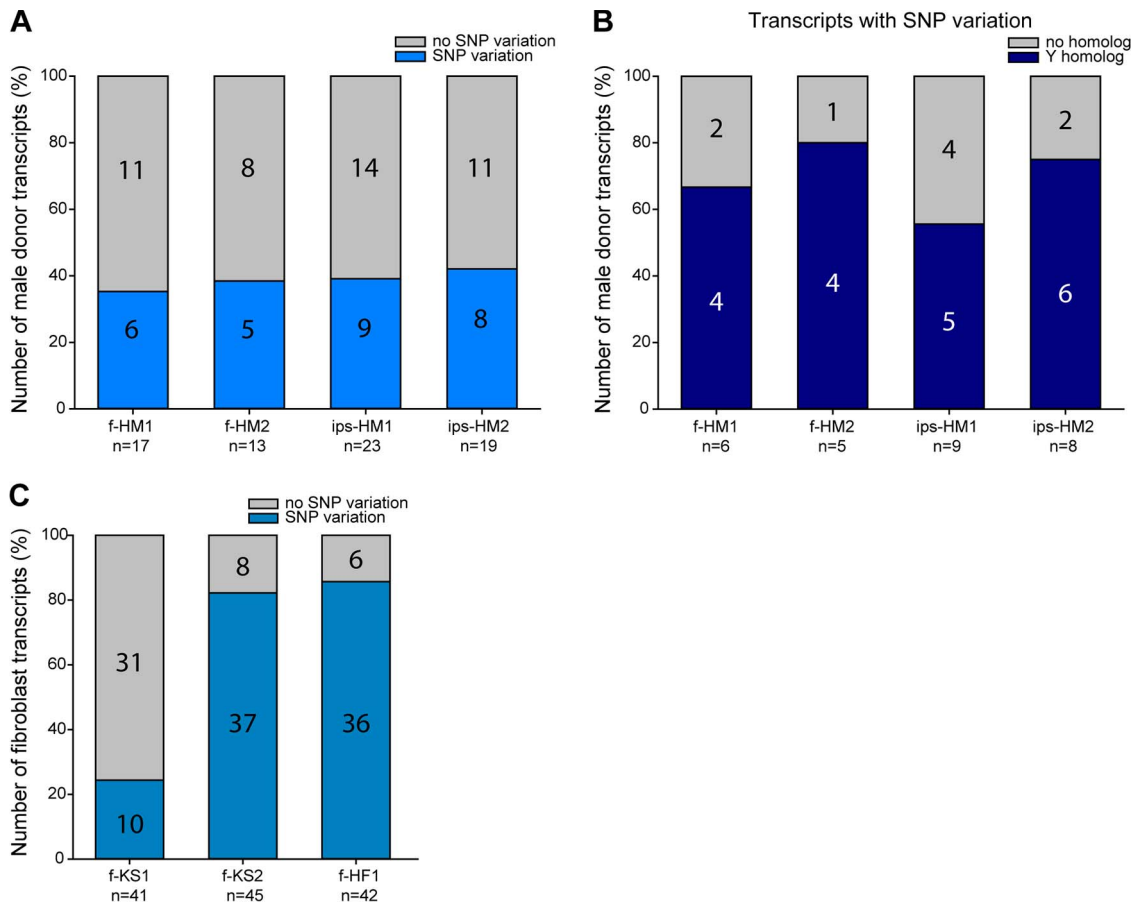

**Supplementary Figure S2 Negative controls.** Negative control staining with mouse (green) and rabbit (red) IgG for either pluripotency, germ layer formation of embryoid bodies or H3K27me3 (tri-methylation of lysine 27 on histone H3) staining. DAPI (grey) was used as counterstaining. Scale bar 100  $\mu$ m. (See also Figs 1 and 3)
