# Supplementary material for: Human induced pluripotent stem cells from two azoospermic patients with Klinefelter syndrome show similar X chromosome inactivation behavior to female pluripotent stem cells
Source: PubMed Central journal article supplement — Hum Reprod. 2019 Nov 19;34(11):2297–310. doi: 10.1093/humrep/dez134 (PMC6894010; doi:10.1093/humrep/dez134), 2019-11-19
Supplement: supp_f3_dez134.pdf [file supp_f3_dez134.pdf]

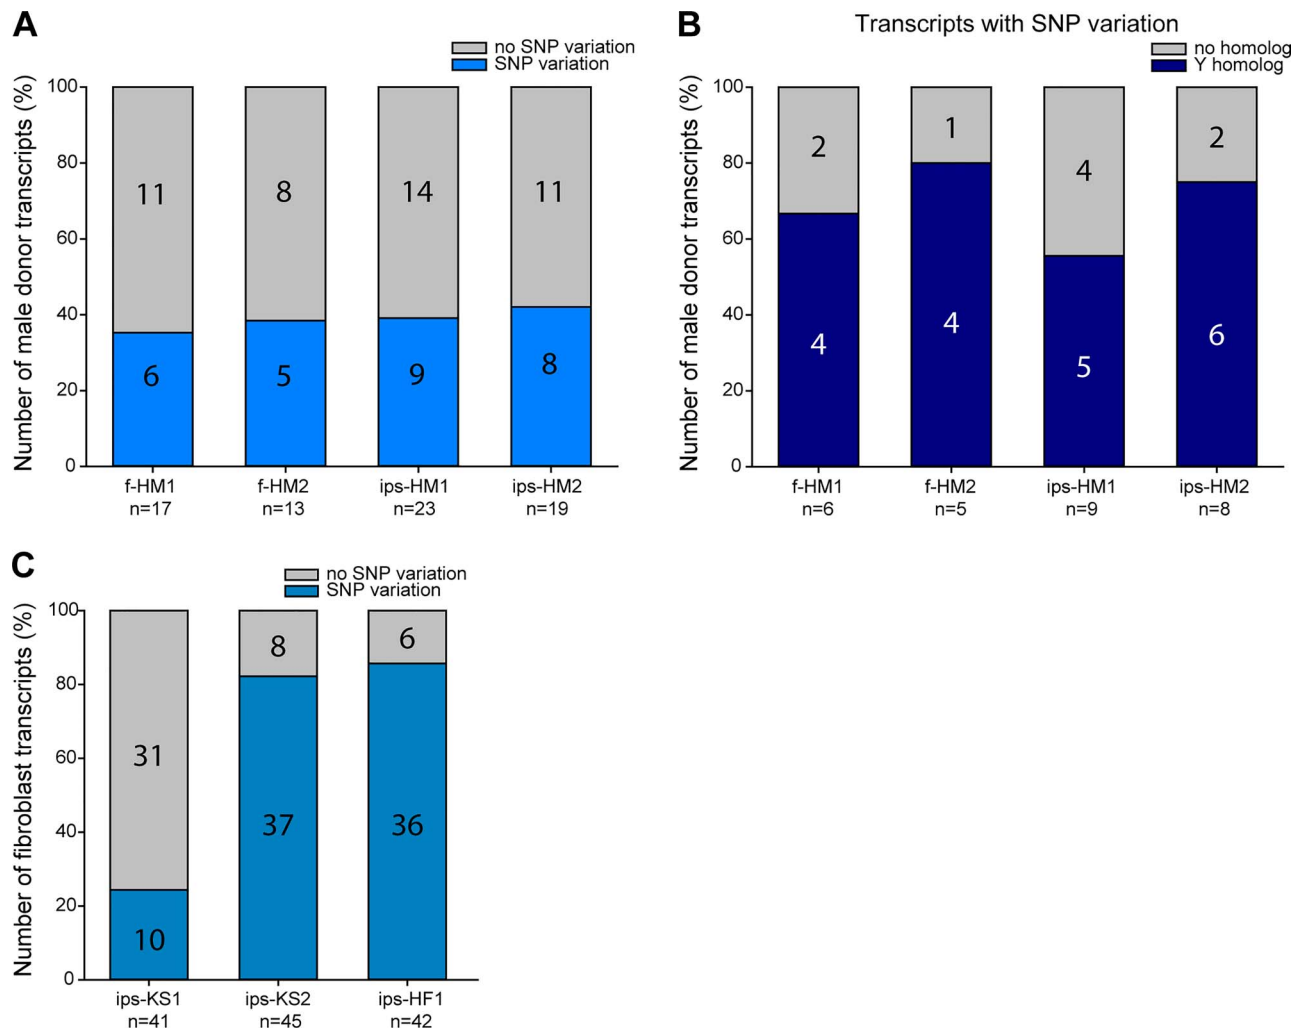

**Supplementary Figure S3 Control single nucleotide polymorphism analysis for HM fibroblasts and hiPSCs as well as single nucleotide polymorphism analysis of KS fibroblasts. (A)** Number of transcripts with or without single nucleotide polymorphism (SNP) variation in HM fibroblast and hiPSC. **(B)** Number of transcripts with SNP variation, with or without Y chromosome homologs. **(C)** Number of transcripts with or without SNP variation in KS and HF fibroblasts. Results combined from three biological replicates. (See also Fig. 4, Supplementary Table SVIII)
