# Supplementary material for: Human induced pluripotent stem cells from two azoospermic patients with Klinefelter syndrome show similar X chromosome inactivation behavior to female pluripotent stem cells
Source: PubMed Central journal article supplement — Hum Reprod. 2019 Nov 19;34(11):2297–310. doi: 10.1093/humrep/dez134 (PMC6894010; doi:10.1093/humrep/dez134), 2019-11-19
Supplement: supp_t1_dez134.pdf [file supp_t1_dez134.pdf]

**Supplementary Table S1** Karyotype analysis information. (See also Fig. 1)

| Cell line | passage | Karyotype | analysed cells |
|-----------|---------|-----------|----------------|
| ips-HM1   | p20     | 46, XY    | 20             |
| ips-HM2   | p12     | 46, XY    | 26             |
| ips-KS1   | p12     | 47, XXY   | 26             |
| ips-KS2   | p20     | 47, XXY   | 25             |
| ips-HF1   | p20     | 46, XX    | 25             |
