# Supplementary material for: Human induced pluripotent stem cells from two azoospermic patients with Klinefelter syndrome show similar X chromosome inactivation behavior to female pluripotent stem cells
Source: PubMed Central journal article supplement — Hum Reprod. 2019 Nov 19;34(11):2297–310. doi: 10.1093/humrep/dez134 (PMC6894010; doi:10.1093/humrep/dez134), 2019-11-19
Supplement: supp_t2_dez134.pdf [file supp_t2_dez134.pdf]

**Supplementary Table SII RNA sequencing sample information.** (See also Fig. 2)

| Sample Name | Total reads<br>(paired-end) | Total uniquely aligned reads<br>(% of alignment) |
|-------------|-----------------------------|--------------------------------------------------|
| f-HMI-A     | 26442323                    | 22412726 (84.76%)                                |
| f-HMI-B     | 29051269                    | 25036031 (86.18%)                                |
| f-HMI-C     | 31990760                    | 28157884 (88.02%)                                |
| f-HM2-A     | 28712382                    | 25436982 (88.59%)                                |
| f-HM2-B     | 30903057                    | 27268262 (88.24%)                                |
| f-HM2-C     | 29156866                    | 26178620 (89.79%)                                |
| f-KS1-A     | 31912802                    | 27502436 (86.18%)                                |
| f-KS1-B     | 30660012                    | 27175994 (88.64%)                                |
| f-KS1-C     | 31596123                    | 27970675 (88.53%)                                |
| f-KS2-A     | 29108090                    | 25369597 (87.16%)                                |
| f-KS2-B     | 30016732                    | 25863541 (86.16%)                                |
| f-KS2-C     | 31732922                    | 28158324 (88.74%)                                |
| f-HF1-A     | 27263821                    | 24200429 (88.76%)                                |
| f-HF1-B     | 33601566                    | 28547861 (84.96%)                                |
| f-HF1-C     | 34731025                    | 29839603 (85.92%)                                |
| ips-HMI-A   | 35621968                    | 30658201 (86.07%)                                |
| ips-HMI-B   | 30541835                    | 26730957 (87.52%)                                |
| ips-HMI-C   | 28924522                    | 25106670 (86.80%)                                |
| ips-HM2-A   | 33373070                    | 29453146 (88.25%)                                |
| ips-HM2-B   | 31271798                    | 27868193 (89.12%)                                |
| ips-HM2-C   | 28269767                    | 24572861 (86.92%)                                |
| ips-KS1-A   | 29244861                    | 25007339 (85.51%)                                |
| ips-KS1-B   | 31930095                    | 27941999 (87.51%)                                |
| ips-KS1-C   | 31351931                    | 27508531 (87.74%)                                |
| ips-KS2-A   | 33387820                    | 29312719 (87.79%)                                |
| ips-KS2-B   | 32981954                    | 29151697 (88.39%)                                |
| ips-KS2-C   | 33102027                    | 28514986 (86.14%)                                |
| ips-HF1-A   | 32352668                    | 28422631 (87.85%)                                |
| ips-HF1-B   | 30883152                    | 25826418 (83.63%)                                |
| ips-HF1-C   | 36296560                    | 32531240 (89.63%)                                |
| HS980-A     | 28758729                    | 23919947 (83.17%)                                |
| HS980-B     | 30366209                    | 26270259 (86.51%)                                |
| HS980-C     | 33487090                    | 29835552 (89.10%)                                |
