# Supplementary material for: Human induced pluripotent stem cells from two azoospermic patients with Klinefelter syndrome show similar X chromosome inactivation behavior to female pluripotent stem cells
Source: PubMed Central journal article supplement — Hum Reprod. 2019 Nov 19;34(11):2297–310. doi: 10.1093/humrep/dez134 (PMC6894010; doi:10.1093/humrep/dez134), 2019-11-19
Supplement: supp_t5_dez134.pdf [file supp_t5_dez134.pdf]

**Supplementary Table SV Enriched GO terms for up-regulated differentially expressed genes in KS fibroblasts (f-KS1, f-KS2) versus HM fibroblasts (f-HM1, f-HM2).** (See also Fig. 2 and Supplementary Table SII) Fertility related GO terms related to Figure 2D in green.

| GO biological process complete                                                                      | Homo sapiens - REFLIST (21042) | Client Text Box Input (216) | Client Text Box Input (expected) | Client Text Box Input (over/under) | Client Text Box Input (fold Enrichment) | Client Text Box Input (raw P-value) | Client Text Box Input (FDR) |
|-----------------------------------------------------------------------------------------------------|--------------------------------|-----------------------------|----------------------------------|------------------------------------|-----------------------------------------|-------------------------------------|-----------------------------|
| macrophage proliferation (GO:0061517)                                                               | 2                              | 2                           | 0.02                             | +                                  | 97.42                                   | 0.000608                            | 0.0499                      |
| microglial cell proliferation (GO:0061518)                                                          | 2                              | 2                           | 0.02                             | +                                  | 97.42                                   | 0.000608                            | 0.0502                      |
| negative regulation of planar cell polarity pathway involved in axis elongation (GO:2000041)        | 2                              | 2                           | 0.02                             | +                                  | 97.42                                   | 0.000608                            | 0.0507                      |
| regulation of planar cell polarity pathway involved in axis elongation (GO:2000040)                 | 2                              | 2                           | 0.02                             | +                                  | 97.42                                   | 0.000608                            | 0.0504                      |
| lateral sprouting from an epithelium (GO:0060601)                                                   | 9                              | 3                           | 0.09                             | +                                  | 32.47                                   | 0.000213                            | 0.0241                      |
| glial cell proliferation (GO:0014009)                                                               | 11                             | 3                           | 0.11                             | +                                  | 26.57                                   | 0.000347                            | 0.0338                      |
| regulation of type B pancreatic cell proliferation (GO:0061469)                                     | 11                             | 3                           | 0.11                             | +                                  | 26.57                                   | 0.000347                            | 0.0336                      |
| <b>prostate gland morphogenesis (GO:0060512)</b>                                                    | 24                             | 6                           | 0.25                             | +                                  | 24.35                                   | 0.00000497                          | 0.000234                    |
| embryonic skeletal joint morphogenesis (GO:0060272)                                                 | 12                             | 3                           | 0.12                             | +                                  | 24.35                                   | 0.00043                             | 0.0392                      |
| regulation of timing of cell differentiation (GO:0048505)                                           | 12                             | 3                           | 0.12                             | +                                  | 24.35                                   | 0.00043                             | 0.039                       |
| maternal behavior (GO:0042711)                                                                      | 13                             | 3                           | 0.13                             | +                                  | 22.48                                   | 0.000525                            | 0.0458                      |
| regulation of development, heterochronic (GO:0040034)                                               | 13                             | 3                           | 0.13                             | +                                  | 22.48                                   | 0.000525                            | 0.046                       |
| <b>prostate gland epithelium morphogenesis (GO:0060740)</b>                                         | 22                             | 5                           | 0.23                             | +                                  | 22.14                                   | 0.00000696                          | 0.00174                     |
| negative regulation of smooth muscle cell migration (GO:0014912)                                    | 20                             | 4                           | 0.21                             | +                                  | 19.48                                   | 0.0000939                           | 0.0126                      |
| negative regulation of epithelial to mesenchymal transition (GO:0010719)                            | 27                             | 5                           | 0.28                             | +                                  | 18.04                                   | 0.0000167                           | 0.00359                     |
| positive regulation of morphogenesis of an epithelium (GO:1905332)                                  | 33                             | 5                           | 0.34                             | +                                  | 14.76                                   | 0.0000395                           | 0.00652                     |
| <b>prostate gland development (GO:0030850)</b>                                                      | 42                             | 6                           | 0.43                             | +                                  | 13.92                                   | 0.0000882                           | 0.00211                     |
| negative regulation of intrinsic apoptotic signaling pathway in response to DNA damage (GO:1902230) | 29                             | 4                           | 0.3                              | +                                  | 13.44                                   | 0.000337                            | 0.0337                      |
| positive regulation of mesenchymal cell proliferation (GO:0002053)                                  | 29                             | 4                           | 0.3                              | +                                  | 13.44                                   | 0.000337                            | 0.0335                      |
| <b>reproductive behavior (GO:0019098)</b>                                                           | 30                             | 4                           | 0.31                             | +                                  | 12.99                                   | 0.000379                            | 0.0358                      |
| mammary gland duct morphogenesis (GO:0060603)                                                       | 30                             | 4                           | 0.31                             | +                                  | 12.99                                   | 0.000379                            | 0.0356                      |
| regulation of morphogenesis of a branching structure (GO:0060688)                                   | 55                             | 7                           | 0.56                             | +                                  | 12.4                                    | 0.00000311                          | 0.000876                    |
| mammary gland epithelium development (GO:0061180)                                                   | 58                             | 7                           | 0.6                              | +                                  | 11.76                                   | 0.00000428                          | 0.00113                     |
| mammary gland morphogenesis (GO:0060443)                                                            | 42                             | 5                           | 0.43                             | +                                  | 11.6                                    | 0.000112                            | 0.0144                      |
| negative regulation of peptidyl-tyrosine phosphorylation (GO:0050732)                               | 47                             | 5                           | 0.48                             | +                                  | 10.36                                   | 0.000182                            | 0.0212                      |

Continued

**Supplementary Table SV Continued**

| <b>GO biological process complete</b>                                                                        | <b>Homo sapiens - REFLIST (21042)</b> | <b>Client Text Box Input (216)</b> | <b>Client Text Box Input (expected)</b> | <b>Client Text Box Input (over/under)</b> | <b>Client Text Box Input (fold Enrichment)</b> | <b>Client Text Box Input (raw P-value)</b> | <b>Client Text Box Input (FDR)</b> |
|--------------------------------------------------------------------------------------------------------------|---------------------------------------|------------------------------------|-----------------------------------------|-------------------------------------------|------------------------------------------------|--------------------------------------------|------------------------------------|
| negative regulation of BMP signaling pathway (GO:0030514)                                                    | 49                                    | 5                                  | 0.5                                     | +                                         | 9.94                                           | 0.000218                                   | 0.0243                             |
| <b>gland morphogenesis (GO:0022612)</b>                                                                      | 97                                    | 9                                  | 1                                       | +                                         | 9.04                                           | 0.0000137                                  | 0.000493                           |
| positive regulation of epithelial cell proliferation (GO:0050679)                                            | 171                                   | 15                                 | 1.76                                    | +                                         | 8.55                                           | 7.99E-10                                   | 1.77E-06                           |
| negative regulation of cell morphogenesis involved in differentiation (GO:0010771)                           | 81                                    | 7                                  | 0.83                                    | +                                         | 8.42                                           | 0.0000321                                  | 0.00565                            |
| negative regulation of developmental growth (GO:0048640)                                                     | 83                                    | 7                                  | 0.85                                    | +                                         | 8.22                                           | 0.0000371                                  | 0.00632                            |
| negative regulation of transmembrane receptor protein serine/threonine kinase signaling pathway (GO:0090101) | 108                                   | 9                                  | 1.11                                    | +                                         | 8.12                                           | 0.00000312                                 | 0.000865                           |
| glycosaminoglycan biosynthetic process (GO:0006024)                                                          | 101                                   | 8                                  | 1.04                                    | +                                         | 7.72                                           | 0.0000157                                  | 0.00344                            |
| digestive tract development (GO:0048565)                                                                     | 127                                   | 10                                 | 1.3                                     | +                                         | 7.67                                           | 0.0000142                                  | 0.000501                           |
| aminoglycan biosynthetic process (GO:0006023)                                                                | 102                                   | 8                                  | 1.05                                    | +                                         | 7.64                                           | 0.0000168                                  | 0.00357                            |
| negative regulation of cellular response to growth factor stimulus (GO:0090288)                              | 131                                   | 10                                 | 1.34                                    | +                                         | 7.44                                           | 0.00000185                                 | 0.000609                           |
| response to cAMP (GO:0051591)                                                                                | 97                                    | 7                                  | 1                                       | +                                         | 7.03                                           | 0.0000936                                  | 0.0126                             |
| digestive system development (GO:0055123)                                                                    | 139                                   | 10                                 | 1.43                                    | +                                         | 7.01                                           | 0.00000304                                 | 0.000874                           |
| mammary gland development (GO:0030879)                                                                       | 129                                   | 9                                  | 1.32                                    | +                                         | 6.8                                            | 0.0000121                                  | 0.00279                            |
| regulation of blood coagulation (GO:0030193)                                                                 | 89                                    | 6                                  | 0.91                                    | +                                         | 6.57                                           | 0.000421                                   | 0.0386                             |
| regulation of hemostasis (GO:1900046)                                                                        | 89                                    | 6                                  | 0.91                                    | +                                         | 6.57                                           | 0.000421                                   | 0.0388                             |
| osteoblast differentiation (GO:0001649)                                                                      | 121                                   | 8                                  | 1.24                                    | +                                         | 6.44                                           | 0.0000531                                  | 0.00807                            |
| cardiac chamber development (GO:0003205)                                                                     | 156                                   | 10                                 | 1.6                                     | +                                         | 6.24                                           | 0.00000797                                 | 0.00193                            |
| regulation of coagulation (GO:0050818)                                                                       | 94                                    | 6                                  | 0.96                                    | +                                         | 6.22                                           | 0.000553                                   | 0.0477                             |
| regulation of osteoblast differentiation (GO:0045667)                                                        | 110                                   | 7                                  | 1.13                                    | +                                         | 6.2                                            | 0.000196                                   | 0.0225                             |
| regulation of epithelial cell proliferation (GO:0050678)                                                     | 306                                   | 19                                 | 3.14                                    | +                                         | 6.05                                           | 1.02E-09                                   | 1.76E-06                           |
| cellular response to fibroblast growth factor stimulus (GO:0044344)                                          | 114                                   | 7                                  | 1.17                                    | +                                         | 5.98                                           | 0.000241                                   | 0.0263                             |
| connective tissue development (GO:0061448)                                                                   | 202                                   | 12                                 | 2.07                                    | +                                         | 5.79                                           | 0.00000208                                 | 0.000671                           |
| lung development (GO:0030324)                                                                                | 169                                   | 10                                 | 1.73                                    | +                                         | 5.76                                           | 0.0000154                                  | 0.00342                            |
| cartilage development (GO:0051216)                                                                           | 153                                   | 9                                  | 1.57                                    | +                                         | 5.73                                           | 0.0000431                                  | 0.00675                            |
| glycosaminoglycan metabolic process (GO:0030203)                                                             | 153                                   | 9                                  | 1.57                                    | +                                         | 5.73                                           | 0.0000431                                  | 0.00669                            |
| regulation of wound healing (GO:0061041)                                                                     | 137                                   | 8                                  | 1.41                                    | +                                         | 5.69                                           | 0.000121                                   | 0.0152                             |
| negative regulation of peptide secretion (GO:0002792)                                                        | 120                                   | 7                                  | 1.23                                    | +                                         | 5.68                                           | 0.000323                                   | 0.033                              |
| cardiac chamber morphogenesis (GO:0003206)                                                                   | 121                                   | 7                                  | 1.24                                    | +                                         | 5.64                                           | 0.000339                                   | 0.0333                             |

Continued

**Supplementary Table SV Continued**

| <b>GO biological process complete</b>                                                               | <b>Homo sapiens -REFLIST (21042)</b> | <b>Client Text Box Input (216)</b> | <b>Client Text Box Input (expected)</b> | <b>Client Text Box Input (over/under)</b> | <b>Client Text Box Input (fold Enrichment)</b> | <b>Client Text Box Input (raw P-value)</b> | <b>Client Text Box Input (FDR)</b> |
|-----------------------------------------------------------------------------------------------------|--------------------------------------|------------------------------------|-----------------------------------------|-------------------------------------------|------------------------------------------------|--------------------------------------------|------------------------------------|
| response to fibroblast growth factor (GO:0071774)                                                   | 121                                  | 7                                  | 1.24                                    | +                                         | 5.64                                           | 0.000339                                   | 0.0335                             |
| respiratory tube development (GO:0030323)                                                           | 173                                  | 10                                 | 1.78                                    | +                                         | 5.63                                           | 0.0000187                                  | 0.00386                            |
| negative regulation of epithelial cell proliferation (GO:0050680)                                   | 123                                  | 7                                  | 1.26                                    | +                                         | 5.54                                           | 0.000373                                   | 0.0355                             |
| respiratory system development (GO:0060541)                                                         | 195                                  | 11                                 | 2                                       | +                                         | 5.5                                            | 0.0000887                                  | 0.00208                            |
| aminoglycan metabolic process (GO:0006022)                                                          | 160                                  | 9                                  | 1.64                                    | +                                         | 5.48                                           | 0.0000599                                  | 0.00902                            |
| negative regulation of cell growth (GO:0030308)                                                     | 161                                  | 9                                  | 1.65                                    | +                                         | 5.45                                           | 0.0000627                                  | 0.00935                            |
| negative regulation of growth (GO:0045926)                                                          | 236                                  | 13                                 | 2.42                                    | +                                         | 5.37                                           | 0.00000173                                 | 0.000582                           |
| regulation of muscle tissue development (GO:1901861)                                                | 127                                  | 7                                  | 1.3                                     | +                                         | 5.37                                           | 0.000448                                   | 0.0401                             |
| response to organophosphorus (GO:0046683)                                                           | 133                                  | 7                                  | 1.37                                    | +                                         | 5.13                                           | 0.000582                                   | 0.0496                             |
| <b>urogenital system development (GO:0001655)</b>                                                   | 306                                  | 16                                 | 3.14                                    | +                                         | 5.09                                           | 0.00000021                                 | 0.00013                            |
| regulation of cellular response to growth factor stimulus (GO:0090287)                              | 249                                  | 13                                 | 2.56                                    | +                                         | 5.09                                           | 0.00000303                                 | 0.000903                           |
| regulation of transmembrane receptor protein serine/threonine kinase signaling pathway (GO:0090092) | 215                                  | 11                                 | 2.21                                    | +                                         | 4.98                                           | 0.0000211                                  | 0.0042                             |
| regulation of response to wounding (GO:1903034)                                                     | 160                                  | 8                                  | 1.64                                    | +                                         | 4.87                                           | 0.00033                                    | 0.0333                             |
| regulation of ossification (GO:0030278)                                                             | 182                                  | 9                                  | 1.87                                    | +                                         | 4.82                                           | 0.000153                                   | 0.0183                             |
| ossification (GO:0001503)                                                                           | 248                                  | 12                                 | 2.55                                    | +                                         | 4.71                                           | 0.0000151                                  | 0.0034                             |
| negative regulation of cell migration (GO:0030336)                                                  | 230                                  | 11                                 | 2.36                                    | +                                         | 4.66                                           | 0.0000381                                  | 0.00642                            |
| renal system development (GO:0072001)                                                               | 272                                  | 13                                 | 2.79                                    | +                                         | 4.66                                           | 0.00000755                                 | 0.00186                            |
| central nervous system neuron differentiation (GO:0021953)                                          | 169                                  | 8                                  | 1.73                                    | +                                         | 4.61                                           | 0.000468                                   | 0.0413                             |
| mesenchyme development (GO:0060485)                                                                 | 190                                  | 9                                  | 1.95                                    | +                                         | 4.61                                           | 0.000208                                   | 0.0237                             |
| kidney development (GO:0001822)                                                                     | 254                                  | 12                                 | 2.61                                    | +                                         | 4.6                                            | 0.000019                                   | 0.00387                            |
| negative regulation of cellular component movement (GO:0051271)                                     | 261                                  | 12                                 | 2.68                                    | +                                         | 4.48                                           | 0.0000245                                  | 0.00464                            |
| negative regulation of cell motility (GO:2000146)                                                   | 245                                  | 11                                 | 2.51                                    | +                                         | 4.37                                           | 0.0000657                                  | 0.00952                            |
| positive regulation of growth (GO:0045927)                                                          | 249                                  | 11                                 | 2.56                                    | +                                         | 4.3                                            | 0.0000755                                  | 0.0105                             |
| negative regulation of locomotion (GO:0040013)                                                      | 277                                  | 12                                 | 2.84                                    | +                                         | 4.22                                           | 0.0000427                                  | 0.00683                            |
| regulation of developmental growth (GO:0048638)                                                     | 303                                  | 13                                 | 3.11                                    | +                                         | 4.18                                           | 0.0000226                                  | 0.00443                            |
| negative regulation of apoptotic signaling pathway (GO:2001234)                                     | 211                                  | 9                                  | 2.17                                    | +                                         | 4.16                                           | 0.000434                                   | 0.0391                             |
| <b>reproductive structure development (GO:0048608)</b>                                              | 423                                  | 18                                 | 4.34                                    | +                                         | 4.15                                           | 0.000000656                                | 0.000275                           |
| tube development (GO:0035295)                                                                       | 563                                  | 24                                 | 5.78                                    | +                                         | 4.15                                           | 7.84E-09                                   | 8.1E-06                            |
| multi-multicellular organism process (GO:0044706)                                                   | 212                                  | 9                                  | 2.18                                    | +                                         | 4.14                                           | 0.000449                                   | 0.04                               |

Continued

Supplementary Table SV Continued

| GO biological process complete                                    | Homo sapiens - REFLIST (21042) | Client Text Box Input (216) | Client Text Box Input (expected) | Client Text Box Input (over/under) | Client Text Box Input (fold Enrichment) | Client Text Box Input (raw P-value) | Client Text Box Input (FDR) |
|-------------------------------------------------------------------|--------------------------------|-----------------------------|----------------------------------|------------------------------------|-----------------------------------------|-------------------------------------|-----------------------------|
| reproductive system development (GO:0061458)                      | 427                            | 18                          | 4.38                             | +                                  | 4.11                                    | 0.000000748                         | 0.000297                    |
| negative regulation of cell development (GO:0010721)              | 277                            | 11                          | 2.84                             | +                                  | 3.87                                    | 0.000186                            | 0.0215                      |
| epithelial tube morphogenesis (GO:0060562)                        | 303                            | 12                          | 3.11                             | +                                  | 3.86                                    | 0.0000973                           | 0.0129                      |
| regulation of organ morphogenesis (GO:2000027)                    | 255                            | 10                          | 2.62                             | +                                  | 3.82                                    | 0.000399                            | 0.0373                      |
| tube morphogenesis (GO:0035239)                                   | 341                            | 13                          | 3.5                              | +                                  | 3.71                                    | 0.0000724                           | 0.0102                      |
| negative regulation of response to external stimulus (GO:0032102) | 269                            | 10                          | 2.76                             | +                                  | 3.62                                    | 0.000596                            | 0.0502                      |
| angiogenesis (GO:0001525)                                         | 297                            | 11                          | 3.05                             | +                                  | 3.61                                    | 0.00033                             | 0.0334                      |
| developmental growth (GO:0048589)                                 | 352                            | 13                          | 3.61                             | +                                  | 3.6                                     | 0.0000985                           | 0.0129                      |
| gland development (GO:0048732)                                    | 409                            | 15                          | 4.2                              | +                                  | 3.57                                    | 0.000031                            | 0.00566                     |
| blood vessel morphogenesis (GO:0048514)                           | 386                            | 14                          | 3.96                             | +                                  | 3.53                                    | 0.0000641                           | 0.00947                     |
| negative regulation of cell differentiation (GO:0045596)          | 639                            | 23                          | 6.56                             | +                                  | 3.51                                    | 0.000000307                         | 0.00017                     |
| positive regulation of cell proliferation (GO:0008284)            | 871                            | 31                          | 8.94                             | +                                  | 3.47                                    | 2.84E-09                            | 3.67E-06                    |
| cell proliferation (GO:0008283)                                   | 678                            | 24                          | 6.96                             | +                                  | 3.45                                    | 0.000000224                         | 0.000134                    |
| blood vessel development (GO:0001568)                             | 466                            | 16                          | 4.78                             | +                                  | 3.34                                    | 0.0000363                           | 0.00633                     |
| regulation of cell migration (GO:0030334)                         | 733                            | 25                          | 7.52                             | +                                  | 3.32                                    | 0.000000242                         | 0.000139                    |
| regulation of growth (GO:0040008)                                 | 649                            | 22                          | 6.66                             | +                                  | 3.3                                     | 0.00000147                          | 0.000508                    |
| morphogenesis of an epithelium (GO:0002009)                       | 419                            | 14                          | 4.3                              | +                                  | 3.25                                    | 0.000148                            | 0.0179                      |
| heart development (GO:0007507)                                    | 481                            | 16                          | 4.94                             | +                                  | 3.24                                    | 0.0000523                           | 0.00803                     |
| growth (GO:0040007)                                               | 395                            | 13                          | 4.05                             | +                                  | 3.21                                    | 0.000293                            | 0.0303                      |
| vasculature development (GO:0001944)                              | 490                            | 16                          | 5.03                             | +                                  | 3.18                                    | 0.0000646                           | 0.00945                     |
| cardiovascular system development (GO:0072358)                    | 500                            | 16                          | 5.13                             | +                                  | 3.12                                    | 0.0000812                           | 0.0112                      |
| skeletal system development (GO:0001501)                          | 469                            | 15                          | 4.81                             | +                                  | 3.12                                    | 0.000137                            | 0.0169                      |
| cellular response to growth factor stimulus (GO:0071363)          | 470                            | 15                          | 4.82                             | +                                  | 3.11                                    | 0.00014                             | 0.0172                      |
| regulation of cell motility (GO:2000145)                          | 784                            | 25                          | 8.05                             | +                                  | 3.11                                    | 0.000000803                         | 0.000311                    |
| response to toxic substance (GO:0009636)                          | 501                            | 16                          | 5.14                             | +                                  | 3.11                                    | 0.0000831                           | 0.0114                      |
| negative regulation of response to stimulus (GO:0048585)          | 1477                           | 47                          | 15.16                            | +                                  | 3.1                                     | 4.88E-12                            | 1.89E-08                    |
| animal organ morphogenesis (GO:0009887)                           | 881                            | 28                          | 9.04                             | +                                  | 3.1                                     | 0.00000176                          | 0.000119                    |
| post-translational protein modification (GO:0043687)              | 440                            | 14                          | 4.52                             | +                                  | 3.1                                     | 0.00024                             | 0.0264                      |
| positive regulation of cell motility (GO:2000147)                 | 445                            | 14                          | 4.57                             | +                                  | 3.06                                    | 0.000268                            | 0.0281                      |
| head development (GO:0060322)                                     | 734                            | 23                          | 7.53                             | +                                  | 3.05                                    | 0.00000303                          | 0.000886                    |
| developmental process involved in reproduction (GO:0003006)       | 649                            | 20                          | 6.66                             | +                                  | 3                                       | 0.0000174                           | 0.00365                     |
| negative regulation of signal transduction (GO:0009968)           | 1176                           | 36                          | 12.07                            | +                                  | 2.98                                    | 6.26E-09                            | 6.94E-06                    |

Continued

**Supplementary Table SV Continued**

| <b>GO biological process complete</b>                                 | <b>Homo sapiens<br/>- REFLIST<br/>(21042)</b> | <b>Client Text<br/>Box Input<br/>(216)</b> | <b>Client Text<br/>Box Input<br/>(expected)</b> | <b>Client Text<br/>Box Input<br/>(over/under)</b> | <b>Client Text<br/>Box Input (fold<br/>Enrichment)</b> | <b>Client Text<br/>Box Input (raw<br/>P-value)</b> | <b>Client Text<br/>Box Input<br/>(FDR)</b> |
|-----------------------------------------------------------------------|-----------------------------------------------|--------------------------------------------|-------------------------------------------------|---------------------------------------------------|--------------------------------------------------------|----------------------------------------------------|--------------------------------------------|
| negative regulation of signaling (GO:0023057)                         | 1277                                          | 39                                         | 13.11                                           | +                                                 | 2.98                                                   | 1.4E-09                                            | 2.17E-06                                   |
| positive regulation of cellular component movement (GO:0051272)       | 457                                           | 14                                         | 4.69                                            | +                                                 | 2.98                                                   | 0.000348                                           | 0.0335                                     |
| tissue morphogenesis (GO:0048729)                                     | 526                                           | 16                                         | 5.4                                             | +                                                 | 2.96                                                   | 0.000143                                           | 0.0175                                     |
| regulation of cellular component movement (GO:0051270)                | 858                                           | 26                                         | 8.81                                            | +                                                 | 2.95                                                   | 0.0000012                                          | 0.000443                                   |
| brain development (GO:0007420)                                        | 697                                           | 21                                         | 7.15                                            | +                                                 | 2.94                                                   | 0.0000148                                          | 0.00337                                    |
| response to growth factor (GO:0070848)                                | 497                                           | 15                                         | 5.1                                             | +                                                 | 2.94                                                   | 0.00025                                            | 0.0268                                     |
| negative regulation of cell communication (GO:0010648)                | 1273                                          | 38                                         | 13.07                                           | +                                                 | 2.91                                                   | 4.32E-09                                           | 5.15E-06                                   |
| circulatory system development (GO:0072359)                           | 808                                           | 24                                         | 8.29                                            | +                                                 | 2.89                                                   | 0.00000443                                         | 0.00114                                    |
| positive regulation of locomotion (GO:0040017)                        | 477                                           | 14                                         | 4.9                                             | +                                                 | 2.86                                                   | 0.000526                                           | 0.0456                                     |
| regulation of locomotion (GO:0040012)                                 | 855                                           | 25                                         | 8.78                                            | +                                                 | 2.85                                                   | 0.00000361                                         | 0.000982                                   |
| regulation of receptor activity (GO:0010469)                          | 547                                           | 16                                         | 5.62                                            | +                                                 | 2.85                                                   | 0.00022                                            | 0.0243                                     |
| negative regulation of developmental process (GO:0051093)             | 862                                           | 25                                         | 8.85                                            | +                                                 | 2.83                                                   | 0.00000415                                         | 0.00111                                    |
| positive regulation of developmental process (GO:0051094)             | 1241                                          | 36                                         | 12.74                                           | +                                                 | 2.83                                                   | 0.000000024                                        | 2.07E-05                                   |
| negative regulation of multicellular organismal process (GO:0051241)  | 1044                                          | 30                                         | 10.72                                           | +                                                 | 2.8                                                    | 0.000000497                                        | 0.000241                                   |
| embryonic morphogenesis (GO:0048598)                                  | 563                                           | 16                                         | 5.78                                            | +                                                 | 2.77                                                   | 0.0003                                             | 0.0308                                     |
| positive regulation of multicellular organismal process (GO:0051240)  | 1493                                          | 41                                         | 15.33                                           | +                                                 | 2.68                                                   | 9.84E-09                                           | 9.53E-06                                   |
| anatomical structure formation involved in morphogenesis (GO:0048646) | 840                                           | 23                                         | 8.62                                            | +                                                 | 2.67                                                   | 0.000025                                           | 0.00462                                    |
| central nervous system development (GO:0007417)                       | 899                                           | 24                                         | 9.23                                            | +                                                 | 2.6                                                    | 0.0000246                                          | 0.00459                                    |
| regulation of neurogenesis (GO:0050767)                               | 675                                           | 18                                         | 6.93                                            | +                                                 | 2.6                                                    | 0.000269                                           | 0.028                                      |
| positive regulation of cell differentiation (GO:0045597)              | 862                                           | 23                                         | 8.85                                            | +                                                 | 2.6                                                    | 0.0000369                                          | 0.00636                                    |
| regulation of cell proliferation (GO:0042127)                         | 1588                                          | 42                                         | 16.3                                            | +                                                 | 2.58                                                   | 0.000000018                                        | 1.64E-05                                   |
| neuron differentiation (GO:0030182)                                   | 925                                           | 24                                         | 9.5                                             | +                                                 | 2.53                                                   | 0.0000383                                          | 0.00638                                    |
| regulation of nervous system development (GO:0051960)                 | 770                                           | 20                                         | 7.9                                             | +                                                 | 2.53                                                   | 0.000172                                           | 0.0202                                     |
| negative regulation of apoptotic process (GO:0043066)                 | 853                                           | 22                                         | 8.76                                            | +                                                 | 2.51                                                   | 0.0000891                                          | 0.0121                                     |
| negative regulation of cell proliferation (GO:0008285)                | 661                                           | 17                                         | 6.79                                            | +                                                 | 2.51                                                   | 0.000592                                           | 0.0502                                     |
| negative regulation of programmed cell death (GO:0043069)             | 867                                           | 22                                         | 8.9                                             | +                                                 | 2.47                                                   | 0.000112                                           | 0.0145                                     |
| anatomical structure morphogenesis (GO:0009653)                       | 2021                                          | 51                                         | 20.75                                           | +                                                 | 2.46                                                   | 1.93E-09                                           | 2.72E-06                                   |
| neurogenesis (GO:0022008)                                             | 1471                                          | 37                                         | 15.1                                            | +                                                 | 2.45                                                   | 0.0000061                                          | 0.00027                                    |

*Continued*

**Supplementary Table SV Continued**

| <b>GO biological process complete</b>                           | <b>Homo sapiens<br/>-REFLIST<br/>(21042)</b> | <b>Client Text<br/>Box Input<br/>(216)</b> | <b>Client Text<br/>Box Input<br/>(expected)</b> | <b>Client Text<br/>Box Input<br/>(over/under)</b> | <b>Client Text<br/>Box Input (fold<br/>Enrichment)</b> | <b>Client Text<br/>Box Input (raw<br/>P-value)</b> | <b>Client Text<br/>Box Input<br/>(FDR)</b> |
|-----------------------------------------------------------------|----------------------------------------------|--------------------------------------------|-------------------------------------------------|---------------------------------------------------|--------------------------------------------------------|----------------------------------------------------|--------------------------------------------|
| regulation of cell development (GO:0060284)                     | 794                                          | 20                                         | 8.15                                            | +                                                 | 2.45                                                   | 0.000254                                           | 0.027                                      |
| cell adhesion (GO:0007155)                                      | 873                                          | 22                                         | 8.96                                            | +                                                 | 2.45                                                   | 0.000123                                           | 0.0154                                     |
| biological adhesion (GO:0022610)                                | 878                                          | 22                                         | 9.01                                            | +                                                 | 2.44                                                   | 0.000217                                           | 0.0244                                     |
| embryo development (GO:0009790)                                 | 924                                          | 23                                         | 9.49                                            | +                                                 | 2.42                                                   | 0.000153                                           | 0.0183                                     |
| tissue development (GO:0009888)                                 | 1658                                         | 41                                         | 17.02                                           | +                                                 | 2.41                                                   | 0.00000179                                         | 0.000116                                   |
| response to organonitrogen compound (GO:0010243)                | 884                                          | 21                                         | 9.07                                            | +                                                 | 2.31                                                   | 0.000461                                           | 0.0408                                     |
| regulation of anatomical structure morphogenesis (GO:0022603)   | 980                                          | 23                                         | 10.06                                           | +                                                 | 2.29                                                   | 0.000265                                           | 0.0279                                     |
| generation of neurons (GO:0048699)                              | 1374                                         | 32                                         | 14.1                                            | +                                                 | 2.27                                                   | 0.0000209                                          | 0.00422                                    |
| regulation of multicellular organismal development (GO:2000026) | 1805                                         | 42                                         | 18.53                                           | +                                                 | 2.27                                                   | 0.00000062                                         | 0.000267                                   |
| negative regulation of cell death (GO:0060548)                  | 946                                          | 22                                         | 9.71                                            | +                                                 | 2.27                                                   | 0.000408                                           | 0.0379                                     |
| cellular response to oxygen-containing compound (GO:1901701)    | 905                                          | 21                                         | 9.29                                            | +                                                 | 2.26                                                   | 0.000578                                           | 0.0495                                     |
| regulation of cell differentiation (GO:0045595)                 | 1643                                         | 38                                         | 16.87                                           | +                                                 | 2.25                                                   | 0.00000282                                         | 0.000857                                   |
| nervous system development (GO:0007399)                         | 2206                                         | 50                                         | 22.64                                           | +                                                 | 2.21                                                   | 8.81E-08                                           | 0.000065                                   |
| reproduction (GO:0000003)                                       | 1372                                         | 31                                         | 14.08                                           | +                                                 | 2.2                                                    | 0.0000428                                          | 0.00677                                    |
| reproductive process (GO:0022414)                               | 1371                                         | 31                                         | 14.07                                           | +                                                 | 2.2                                                    | 0.0000424                                          | 0.00684                                    |
| animal organ development (GO:0048513)                           | 2988                                         | 66                                         | 30.67                                           | +                                                 | 2.15                                                   | 9.67E-10                                           | 1.87E-06                                   |
| regulation of developmental process (GO:0050793)                | 2379                                         | 51                                         | 24.42                                           | +                                                 | 2.09                                                   | 0.000000417                                        | 0.000209                                   |
| regulation of multicellular organismal process (GO:0051239)     | 2777                                         | 59                                         | 28.51                                           | +                                                 | 2.07                                                   | 4.81E-08                                           | 3.92E-05                                   |
| system development (GO:0048731)                                 | 4173                                         | 88                                         | 42.84                                           | +                                                 | 2.05                                                   | 3.87E-12                                           | 3E-08                                      |
| response to oxygen-containing compound (GO:1901700)             | 1445                                         | 30                                         | 14.83                                           | +                                                 | 2.02                                                   | 0.000358                                           | 0.0343                                     |
| intracellular signal transduction (GO:0035556)                  | 1605                                         | 33                                         | 16.48                                           | +                                                 | 2                                                      | 0.000153                                           | 0.0181                                     |
| multicellular organism development (GO:0007275)                 | 4769                                         | 97                                         | 48.95                                           | +                                                 | 1.98                                                   | 7.12E-13                                           | 1.1E-08                                    |
| cellular response to organic substance (GO:0071310)             | 2150                                         | 43                                         | 22.07                                           | +                                                 | 1.95                                                   | 0.0000235                                          | 0.00455                                    |
| regulation of signal transduction (GO:0009966)                  | 3083                                         | 61                                         | 31.65                                           | +                                                 | 1.93                                                   | 0.000000335                                        | 0.000179                                   |
| anatomical structure development (GO:0048856)                   | 5137                                         | 100                                        | 52.73                                           | +                                                 | 1.9                                                    | 4.81E-12                                           | 2.49E-08                                   |
| cellular response to chemical stimulus (GO:0070887)             | 2624                                         | 51                                         | 26.94                                           | +                                                 | 1.89                                                   | 0.00000686                                         | 0.00174                                    |
| regulation of cell communication (GO:0010646)                   | 3374                                         | 64                                         | 34.63                                           | +                                                 | 1.85                                                   | 0.000000604                                        | 0.000276                                   |
| developmental process (GO:0032502)                              | 5497                                         | 104                                        | 56.43                                           | +                                                 | 1.84                                                   | 5.54E-12                                           | 1.72E-08                                   |
| regulation of signaling (GO:0023051)                            | 3423                                         | 64                                         | 35.14                                           | +                                                 | 1.82                                                   | 0.0000011                                          | 0.000416                                   |
| cell surface receptor signaling pathway (GO:0007166)            | 2278                                         | 42                                         | 23.38                                           | +                                                 | 1.8                                                    | 0.000245                                           | 0.0264                                     |

Continued

**Supplementary Table SV Continued**

| <b>GO biological process complete</b>                  | <b>Homo sapiens<br/>-REFLIST<br/>(21042)</b> | <b>Client Text<br/>Box Input<br/>(216)</b> | <b>Client Text<br/>Box Input<br/>(expected)</b> | <b>Client Text<br/>Box Input<br/>(over/under)</b> | <b>Client Text<br/>Box Input (fold<br/>Enrichment)</b> | <b>Client Text<br/>Box Input (raw<br/>P-value)</b> | <b>Client Text<br/>Box Input<br/>(FDR)</b> |
|--------------------------------------------------------|----------------------------------------------|--------------------------------------------|-------------------------------------------------|---------------------------------------------------|--------------------------------------------------------|----------------------------------------------------|--------------------------------------------|
| cell differentiation (GO:0030154)                      | 3491                                         | 64                                         | 35.84                                           | +                                                 | 1.79                                                   | 0.00000218                                         | 0.000689                                   |
| cellular developmental process (GO:0048869)            | 3565                                         | 65                                         | 36.6                                            | +                                                 | 1.78                                                   | 0.00000258                                         | 0.000801                                   |
| regulation of response to stimulus (GO:0048583)        | 4078                                         | 74                                         | 41.86                                           | +                                                 | 1.77                                                   | 0.00000038                                         | 0.000196                                   |
| response to organic substance (GO:0010033)             | 2765                                         | 50                                         | 28.38                                           | +                                                 | 1.76                                                   | 0.0000679                                          | 0.00975                                    |
| negative regulation of cellular process (GO:0048523)   | 4454                                         | 80                                         | 45.72                                           | +                                                 | 1.75                                                   | 0.00000103                                         | 7.25E-05                                   |
| regulation of localization (GO:0032879)                | 2595                                         | 46                                         | 26.64                                           | +                                                 | 1.73                                                   | 0.000242                                           | 0.0263                                     |
| negative regulation of biological process (GO:0048519) | 4952                                         | 87                                         | 50.83                                           | +                                                 | 1.71                                                   | 7.21E-08                                           | 5.59E-05                                   |
| multicellular organismal process (GO:0032501)          | 6688                                         | 113                                        | 68.65                                           | +                                                 | 1.65                                                   | 6.33E-10                                           | 1.64E-06                                   |
| response to chemical (GO:0042221)                      | 4164                                         | 69                                         | 42.74                                           | +                                                 | 1.61                                                   | 0.0000241                                          | 0.00461                                    |
| signal transduction (GO:0007165)                       | 4956                                         | 77                                         | 50.87                                           | +                                                 | 1.51                                                   | 0.0000719                                          | 0.0102                                     |
| signaling (GO:0023052)                                 | 5349                                         | 81                                         | 54.91                                           | +                                                 | 1.48                                                   | 0.000109                                           | 0.0143                                     |
| cell communication (GO:0007154)                        | 5447                                         | 82                                         | 55.91                                           | +                                                 | 1.47                                                   | 0.00012                                            | 0.0153                                     |
| cellular response to stimulus (GO:0051716)             | 6423                                         | 95                                         | 65.93                                           | +                                                 | 1.44                                                   | 0.00004                                            | 0.00652                                    |
| response to stimulus (GO:0050896)                      | 8142                                         | 120                                        | 83.58                                           | +                                                 | 1.44                                                   | 0.000000725                                        | 0.000296                                   |
| regulation of cellular process (GO:0050794)            | 10764                                        | 136                                        | 110.49                                          | +                                                 | 1.23                                                   | 0.000597                                           | 0.05                                       |
| biological_process (GO:0008150)                        | 17500                                        | 201                                        | 179.64                                          | +                                                 | 1.12                                                   | 0.0000312                                          | 0.00562                                    |

GO: gene ontology
