# Supplementary material for: Human induced pluripotent stem cells from two azoospermic patients with Klinefelter syndrome show similar X chromosome inactivation behavior to female pluripotent stem cells
Source: PubMed Central journal article supplement — Hum Reprod. 2019 Nov 19;34(11):2297–310. doi: 10.1093/humrep/dez134 (PMC6894010; doi:10.1093/humrep/dez134), 2019-11-19
Supplement: supp_t6_dez134.pdf [file supp_t6_dez134.pdf]

**Supplementary Table SVI Enriched GO terms for down-regulated DEGs in KS fibroblasts (f-KS I, f-KS2) versus HM fibroblasts (f-HMI, f-HM2).** (See also Fig. 2 and Supplementary Table SI).

| GO biological process complete                                        | Homo sapiens - REFLIST (21042) | Client Text Box Input (81) | Client Text Box Input (expected) | Client Text Box Input (over/under) | Client Text Box Input (fold Enrichment) | Client Text Box Input (raw P-value) | Client Text Box Input (FDR) |
|-----------------------------------------------------------------------|--------------------------------|----------------------------|----------------------------------|------------------------------------|-----------------------------------------|-------------------------------------|-----------------------------|
| extracellular structure organization (GO:0043062)                     | 359                            | 12                         | 1.38                             | +                                  | 8.68                                    | 1.72E-08                            | 2.70E-04                    |
| extracellular matrix organization (GO:0030198)                        | 315                            | 10                         | 1.21                             | +                                  | 8.25                                    | 4.63E-07                            | 3.64E-03                    |
| angiogenesis (GO:0001525)                                             | 310                            | 9                          | 1.19                             | +                                  | 7.54                                    | 3.67E-06                            | 9.62E-03                    |
| regulation of vasculature development (GO:1901342)                    | 310                            | 8                          | 1.19                             | +                                  | 6.7                                     | 2.99E-05                            | 3.37E-02                    |
| blood vessel morphogenesis (GO:0048514)                               | 397                            | 9                          | 1.53                             | +                                  | 5.89                                    | 2.52E-05                            | 3.05E-02                    |
| cell adhesion (GO:0007155)                                            | 906                            | 15                         | 3.49                             | +                                  | 4.3                                     | 1.92E-06                            | 7.56E-03                    |
| biological adhesion (GO:0022610)                                      | 912                            | 15                         | 3.51                             | +                                  | 4.27                                    | 2.08E-06                            | 6.56E-03                    |
| anatomical structure formation involved in morphogenesis (GO:0048646) | 867                            | 14                         | 3.34                             | +                                  | 4.19                                    | 5.88E-06                            | 1.32E-02                    |
| tube development (GO:0035295)                                         | 815                            | 13                         | 3.14                             | +                                  | 4.14                                    | 1.50E-05                            | 2.36E-02                    |
| circulatory system development (GO:0072359)                           | 839                            | 13                         | 3.23                             | +                                  | 4.03                                    | 2.02E-05                            | 2.65E-02                    |
| positive regulation of developmental process (GO:0051094)             | 1325                           | 16                         | 5.1                              | +                                  | 3.14                                    | 4.22E-05                            | 4.42E-02                    |
| positive regulation of multicellular organismal process (GO:0051240)  | 1667                           | 19                         | 6.42                             | +                                  | 2.96                                    | 1.56E-05                            | 2.23E-02                    |
| regulation of multicellular organismal development (GO:2000026)       | 1918                           | 21                         | 7.38                             | +                                  | 2.84                                    | 9.11E-06                            | 1.79E-02                    |
| regulation of multicellular organismal process (GO:0051239)           | 2937                           | 29                         | 11.31                            | +                                  | 2.57                                    | 7.65E-07                            | 4.01E-03                    |
| regulation of developmental process (GO:0050793)                      | 2466                           | 24                         | 9.49                             | +                                  | 2.53                                    | 1.28E-05                            | 2.23E-02                    |
