# Supplementary material for: Human induced pluripotent stem cells from two azoospermic patients with Klinefelter syndrome show similar X chromosome inactivation behavior to female pluripotent stem cells
Source: PubMed Central journal article supplement — Hum Reprod. 2019 Nov 19;34(11):2297–310. doi: 10.1093/humrep/dez134 (PMC6894010; doi:10.1093/humrep/dez134), 2019-11-19
Supplement: supp_t7_dez134.pdf [file supp_t7_dez134.pdf]

**Supplementary Table SVII Enriched GO terms for down-regulated differentially expressed genes in KS hiPSCs (ips-KS1, ips-KS2) versus HM hiPSCs (ips-HM1, ips-HM2).** (See also Fig. 2 and Supplementary Table SIII) In green: fertility related GO terms related to Figure 2D. In bold: enriched GO terms found also with down-regulated DEGs in ips-KS2 only vs ips-HM1, ips-HM2.

| GO biological process complete                                                                                                               | Homo sapiens - REFLIST (21042) | Client Text Box Input (568) | Client Text Box Input (expected) | Client Text Box Input (over/under) | Client Text Box Input (fold Enrichment) | Client Text Box Input (raw P-value) | Client Text Box Input (FDR) |
|----------------------------------------------------------------------------------------------------------------------------------------------|--------------------------------|-----------------------------|----------------------------------|------------------------------------|-----------------------------------------|-------------------------------------|-----------------------------|
| positive regulation of metanephric mesenchymal cell migration (GO:2000591)                                                                   | 3                              | 3                           | 0.08                             | +                                  | 37.05                                   | 3.40E-04                            | 7.59E-03                    |
| positive regulation of metanephric mesenchymal cell migration by platelet-derived growth factor receptor-beta signaling pathway (GO:1900238) | 3                              | 3                           | 0.08                             | +                                  | 37.05                                   | 3.40E-04                            | 7.58E-03                    |
| regulation of metanephric mesenchymal cell migration by platelet-derived growth factor receptor-beta signaling pathway (GO:1900238)          | 3                              | 3                           | 0.08                             | +                                  | 37.05                                   | 3.40E-04                            | 7.56E-03                    |
| <b>mesenchyme migration (GO:0090131)</b>                                                                                                     | 5                              | 4                           | 0.13                             | +                                  | 29.64                                   | 5.36E-05                            | 1.53E-03                    |
| regulation of metanephric mesenchymal cell migration (GO:2000589)                                                                            | 4                              | 3                           | 0.11                             | +                                  | 27.78                                   | 5.84E-04                            | 1.20E-02                    |
| <b>regulation of endodermal cell differentiation (GO:1903224)</b>                                                                            | 6                              | 4                           | 0.16                             | +                                  | 24.7                                    | 8.74E-05                            | 2.34E-03                    |
| comma-shaped body morphogenesis (GO:0072049)                                                                                                 | 5                              | 3                           | 0.13                             | +                                  | 22.23                                   | 9.17E-04                            | 1.75E-02                    |
| negative regulation of chemokine-mediated signaling pathway (GO:0070100)                                                                     | 5                              | 3                           | 0.13                             | +                                  | 22.23                                   | 9.17E-04                            | 1.74E-02                    |
| peripheral nervous system axon regeneration (GO:0014012)                                                                                     | 5                              | 3                           | 0.13                             | +                                  | 22.23                                   | 9.17E-04                            | 1.75E-02                    |
| positive regulation of glomerular mesangial cell proliferation (GO:0072126)                                                                  | 5                              | 3                           | 0.13                             | +                                  | 22.23                                   | 9.17E-04                            | 1.75E-02                    |
| positive regulation of hair follicle maturation (GO:0048818)                                                                                 | 5                              | 3                           | 0.13                             | +                                  | 22.23                                   | 9.17E-04                            | 1.74E-02                    |
| <b>positive regulation of melanocyte differentiation (GO:0045636)</b>                                                                        | 5                              | 3                           | 0.13                             | +                                  | 22.23                                   | 9.17E-04                            | 1.75E-02                    |
| regulation of cell adhesion molecule production (GO:0060353)                                                                                 | 5                              | 3                           | 0.13                             | +                                  | 22.23                                   | 9.17E-04                            | 1.75E-02                    |
| substrate-dependent cerebral cortex tangential migration (GO:0021825)                                                                        | 5                              | 3                           | 0.13                             | +                                  | 22.23                                   | 9.17E-04                            | 1.74E-02                    |
| tendon development (GO:0035989)                                                                                                              | 5                              | 3                           | 0.13                             | +                                  | 22.23                                   | 9.17E-04                            | 1.74E-02                    |
| pharyngeal arch artery morphogenesis (GO:0061626)                                                                                            | 7                              | 4                           | 0.19                             | +                                  | 21.17                                   | 1.35E-04                            | 3.41E-03                    |
| regulation of cell communication by electrical coupling involved in cardiac conduction (GO:1901844)                                          | 7                              | 4                           | 0.19                             | +                                  | 21.17                                   | 1.35E-04                            | 3.42E-03                    |
| <b>axon extension involved in axon guidance (GO:0048846)</b>                                                                                 | 8                              | 4                           | 0.22                             | +                                  | 18.52                                   | 1.98E-04                            | 4.73E-03                    |
| <b>corticospinal tract morphogenesis (GO:0021957)</b>                                                                                        | 6                              | 3                           | 0.16                             | +                                  | 18.52                                   | 1.35E-03                            | 2.37E-02                    |

Continued

**Supplementary Table SVII Continued**

| <b>GO biological process complete</b>                                                                        | <b>Homo sapiens<br/>- REFLIST<br/>(21042)</b> | <b>Client Text<br/>Box Input<br/>(568)</b> | <b>Client Text<br/>Box Input<br/>(expected)</b> | <b>Client Text<br/>Box Input<br/>(over/under)</b> | <b>Client Text<br/>Box Input (fold<br/>Enrichment)</b> | <b>Client Text<br/>Box Input (raw<br/>P-value)</b> | <b>Client Text<br/>Box Input<br/>(FDR)</b> |
|--------------------------------------------------------------------------------------------------------------|-----------------------------------------------|--------------------------------------------|-------------------------------------------------|---------------------------------------------------|--------------------------------------------------------|----------------------------------------------------|--------------------------------------------|
| <b>glomerular mesangium development<br/>(GO:0072109)</b>                                                     | 8                                             | 4                                          | 0.22                                            | +                                                 | 18.52                                                  | 1.98E-04                                           | 4.75E-03                                   |
| <b>maintenance of protein location in extracellular<br/>region (GO:0071694)</b>                              | 6                                             | 3                                          | 0.16                                            | +                                                 | 18.52                                                  | 1.35E-03                                           | 2.39E-02                                   |
| negative regulation of mesonephros development<br>(GO:0061218)                                               | 6                                             | 3                                          | 0.16                                            | +                                                 | 18.52                                                  | 1.35E-03                                           | 2.37E-02                                   |
| <b>negative regulation of plasminogen activation<br/>(GO:0010757)</b>                                        | 6                                             | 3                                          | 0.16                                            | +                                                 | 18.52                                                  | 1.35E-03                                           | 2.38E-02                                   |
| negative regulation of platelet-derived growth factor<br>receptor-beta signaling pathway (GO:2000587)        | 8                                             | 4                                          | 0.22                                            | +                                                 | 18.52                                                  | 1.98E-04                                           | 4.74E-03                                   |
| <b>neuron projection extension involved in neuron<br/>projection guidance (GO:1902284)</b>                   | 8                                             | 4                                          | 0.22                                            | +                                                 | 18.52                                                  | 1.98E-04                                           | 4.74E-03                                   |
| paracrine signaling (GO:0038001)                                                                             | 6                                             | 3                                          | 0.16                                            | +                                                 | 18.52                                                  | 1.35E-03                                           | 2.39E-02                                   |
| positive regulation of protein kinase C activity<br>(GO:1900020)                                             | 6                                             | 3                                          | 0.16                                            | +                                                 | 18.52                                                  | 1.35E-03                                           | 2.38E-02                                   |
| <b>protein localization to extracellular region<br/>(GO:0071692)</b>                                         | 6                                             | 3                                          | 0.16                                            | +                                                 | 18.52                                                  | 1.35E-03                                           | 2.39E-02                                   |
| <b>regulation of chemokine-mediated signaling<br/>pathway (GO:0070099)</b>                                   | 8                                             | 4                                          | 0.22                                            | +                                                 | 18.52                                                  | 1.98E-04                                           | 4.72E-03                                   |
| regulation of glomerular mesangial cell proliferation<br>(GO:0072124)                                        | 8                                             | 4                                          | 0.22                                            | +                                                 | 18.52                                                  | 1.98E-04                                           | 4.76E-03                                   |
| regulation of protein kinase C activity (GO:1900019)                                                         | 6                                             | 3                                          | 0.16                                            | +                                                 | 18.52                                                  | 1.35E-03                                           | 2.38E-02                                   |
| response to UV-A (GO:0070141)                                                                                | 6                                             | 3                                          | 0.16                                            | +                                                 | 18.52                                                  | 1.35E-03                                           | 2.38E-02                                   |
| anterior/posterior axon guidance (GO:0033564)                                                                | 7                                             | 3                                          | 0.19                                            | +                                                 | 15.88                                                  | 1.89E-03                                           | 3.12E-02                                   |
| <b>negative regulation of gastrulation (GO:2000542)</b>                                                      | 7                                             | 3                                          | 0.19                                            | +                                                 | 15.88                                                  | 1.89E-03                                           | 3.12E-02                                   |
| platelet-derived growth factor receptor-beta signaling<br>pathway (GO:0035791)                               | 7                                             | 3                                          | 0.19                                            | +                                                 | 15.88                                                  | 1.89E-03                                           | 3.11E-02                                   |
| positive regulation of cell proliferation involved in kidney<br>development (GO:1901724)                     | 7                                             | 3                                          | 0.19                                            | +                                                 | 15.88                                                  | 1.89E-03                                           | 3.11E-02                                   |
| positive regulation of pigment cell differentiation<br>(GO:0050942)                                          | 7                                             | 3                                          | 0.19                                            | +                                                 | 15.88                                                  | 1.89E-03                                           | 3.11E-02                                   |
| regulation of blood vessel endothelial cell proliferation<br>involved in sprouting angiogenesis (GO:1903587) | 7                                             | 3                                          | 0.19                                            | +                                                 | 15.88                                                  | 1.89E-03                                           | 3.11E-02                                   |
| regulation of melanocyte differentiation (GO:0045634)                                                        | 7                                             | 3                                          | 0.19                                            | +                                                 | 15.88                                                  | 1.89E-03                                           | 3.13E-02                                   |
| S-shaped body morphogenesis (GO:0072050)                                                                     | 7                                             | 3                                          | 0.19                                            | +                                                 | 15.88                                                  | 1.89E-03                                           | 3.12E-02                                   |
| collagen-activated signaling pathway (GO:0038065)                                                            | 12                                            | 5                                          | 0.32                                            | +                                                 | 15.44                                                  | 5.87E-05                                           | 1.65E-03                                   |

Continued

Supplementary Table SVII Continued

| GO biological process complete                                                            | Homo sapiens - REFLIST (21042) | Client Text Box Input (568) | Client Text Box Input (expected) | Client Text Box Input (over/under) | Client Text Box Input (fold Enrichment) | Client Text Box Input (raw P-value) | Client Text Box Input (FDR) |
|-------------------------------------------------------------------------------------------|--------------------------------|-----------------------------|----------------------------------|------------------------------------|-----------------------------------------|-------------------------------------|-----------------------------|
| regulation of cell proliferation involved in kidney development (GO:1901722)              | 12                             | 5                           | 0.32                             | +                                  | 15.44                                   | 5.87E-05                            | 1.65E-03                    |
| <b>cell adhesion mediated by integrin (GO:0033627)</b>                                    | 17                             | 7                           | 0.46                             | +                                  | 15.25                                   | 1.96E-06                            | 8.32E-05                    |
| collagen-activated tyrosine kinase receptor signaling pathway (GO:0038063)                | 10                             | 4                           | 0.27                             | +                                  | 14.82                                   | 3.83E-04                            | 8.37E-03                    |
| regulation of platelet-derived growth factor receptor-beta signaling pathway (GO:2000586) | 10                             | 4                           | 0.27                             | +                                  | 14.82                                   | 3.83E-04                            | 8.38E-03                    |
| wound healing; spreading of epidermal cells (GO:0035313)                                  | 10                             | 4                           | 0.27                             | +                                  | 14.82                                   | 3.83E-04                            | 8.36E-03                    |
| <b>endoderm formation (GO:0001706)</b>                                                    | 51                             | 20                          | 1.38                             | +                                  | 14.53                                   | 1.15E-15                            | 2.15E-13                    |
| <b>endodermal cell differentiation (GO:0035987)</b>                                       | 41                             | 16                          | 1.11                             | +                                  | 14.46                                   | 9.00E-13                            | 1.06E-10                    |
| <b>collagen fibril organization (GO:0030199)</b>                                          | 42                             | 16                          | 1.13                             | +                                  | 14.11                                   | 1.21E-12                            | 1.39E-10                    |
| <b>kidney vasculature development (GO:0061440)</b>                                        | 21                             | 8                           | 0.57                             | +                                  | 14.11                                   | 5.72E-07                            | 2.74E-05                    |
| <b>renal system vasculature development (GO:0061437)</b>                                  | 21                             | 8                           | 0.57                             | +                                  | 14.11                                   | 5.72E-07                            | 2.73E-05                    |
| <b>bone trabecula formation (GO:0060346)</b>                                              | 8                              | 3                           | 0.22                             | +                                  | 13.89                                   | 2.55E-03                            | 3.98E-02                    |
| collagen biosynthetic process (GO:0032964)                                                | 8                              | 3                           | 0.22                             | +                                  | 13.89                                   | 2.55E-03                            | 3.98E-02                    |
| epithelial fluid transport (GO:0042045)                                                   | 8                              | 3                           | 0.22                             | +                                  | 13.89                                   | 2.55E-03                            | 3.94E-02                    |
| kidney vasculature morphogenesis (GO:0061439)                                             | 8                              | 3                           | 0.22                             | +                                  | 13.89                                   | 2.55E-03                            | 3.95E-02                    |
| negative regulation of lymphocyte migration (GO:2000402)                                  | 8                              | 3                           | 0.22                             | +                                  | 13.89                                   | 2.55E-03                            | 3.97E-02                    |
| negative regulation of mesenchymal cell proliferation (GO:0072201)                        | 8                              | 3                           | 0.22                             | +                                  | 13.89                                   | 2.55E-03                            | 3.98E-02                    |
| <b>positive regulation of keratinocyte migration (GO:0051549)</b>                         | 8                              | 3                           | 0.22                             | +                                  | 13.89                                   | 2.55E-03                            | 3.96E-02                    |
| positive regulation of Wnt signaling pathway; planar cell polarity pathway (GO:2000096)   | 8                              | 3                           | 0.22                             | +                                  | 13.89                                   | 2.55E-03                            | 3.96E-02                    |
| regulation of hair follicle maturation (GO:0048819)                                       | 8                              | 3                           | 0.22                             | +                                  | 13.89                                   | 2.55E-03                            | 3.97E-02                    |
| renal system vasculature morphogenesis (GO:0061438)                                       | 8                              | 3                           | 0.22                             | +                                  | 13.89                                   | 2.55E-03                            | 3.95E-02                    |
| <b>sequestering of extracellular ligand from receptor (GO:0035581)</b>                    | 8                              | 3                           | 0.22                             | +                                  | 13.89                                   | 2.55E-03                            | 3.96E-02                    |
| skeletal myofibril assembly (GO:0014866)                                                  | 8                              | 3                           | 0.22                             | +                                  | 13.89                                   | 2.55E-03                            | 3.94E-02                    |
| <b>glomerulus vasculature development (GO:0072012)</b>                                    | 19                             | 7                           | 0.51                             | +                                  | 13.65                                   | 3.56E-06                            | 1.42E-04                    |
| negative regulation of axon guidance (GO:1902668)                                         | 11                             | 4                           | 0.3                              | +                                  | 13.47                                   | 5.12E-04                            | 1.08E-02                    |
| negative regulation of muscle adaptation (GO:0014745)                                     | 11                             | 4                           | 0.3                              | +                                  | 13.47                                   | 5.12E-04                            | 1.08E-02                    |

Continued

**Supplementary Table SVII Continued**

| <b>GO biological process complete</b>                                                   | <b>Homo sapiens - REFLIST (21042)</b> | <b>Client Text Box Input (568)</b> | <b>Client Text Box Input (expected)</b> | <b>Client Text Box Input (over/under)</b> | <b>Client Text Box Input (fold Enrichment)</b> | <b>Client Text Box Input (raw P-value)</b> | <b>Client Text Box Input (FDR)</b> |
|-----------------------------------------------------------------------------------------|---------------------------------------|------------------------------------|-----------------------------------------|-------------------------------------------|------------------------------------------------|--------------------------------------------|------------------------------------|
| negative regulation of protein autophosphorylation (GO:0031953)                         | 11                                    | 4                                  | 0.3                                     | +                                         | 13.47                                          | 5.12E-04                                   | 1.08E-02                           |
| regulation of cell communication by electrical coupling (GO:0010649)                    | 11                                    | 4                                  | 0.3                                     | +                                         | 13.47                                          | 5.12E-04                                   | 1.08E-02                           |
| <b>positive regulation of astrocyte differentiation (GO:0048711)</b>                    | 14                                    | 5                                  | 0.38                                    | +                                         | 13.23                                          | 1.06E-04                                   | 2.77E-03                           |
| positive regulation of metanephros development (GO:0072216)                             | 14                                    | 5                                  | 0.38                                    | +                                         | 13.23                                          | 1.06E-04                                   | 2.78E-03                           |
| <b>negative regulation of smooth muscle cell migration (GO:0014912)</b>                 | 20                                    | 7                                  | 0.54                                    | +                                         | 12.97                                          | 4.69E-06                                   | 1.81E-04                           |
| cerebral cortex tangential migration (GO:0021800)                                       | 9                                     | 3                                  | 0.24                                    | +                                         | 12.35                                          | 3.33E-03                                   | 4.81E-02                           |
| chylomicron remodeling (GO:0034371)                                                     | 9                                     | 3                                  | 0.24                                    | +                                         | 12.35                                          | 3.33E-03                                   | 4.82E-02                           |
| mammary gland epithelial cell proliferation (GO:0033598)                                | 12                                    | 4                                  | 0.32                                    | +                                         | 12.35                                          | 6.68E-04                                   | 1.35E-02                           |
| negative regulation of axon extension involved in axon guidance (GO:0048843)            | 9                                     | 3                                  | 0.24                                    | +                                         | 12.35                                          | 3.33E-03                                   | 4.85E-02                           |
| negative regulation of fibroblast growth factor receptor signaling pathway (GO:0040037) | 12                                    | 4                                  | 0.32                                    | +                                         | 12.35                                          | 6.68E-04                                   | 1.35E-02                           |
| negative regulation of heterotypic cell-cell adhesion (GO:0034115)                      | 9                                     | 3                                  | 0.24                                    | +                                         | 12.35                                          | 3.33E-03                                   | 4.86E-02                           |
| positive regulation of catenin import into nucleus (GO:0035413)                         | 12                                    | 4                                  | 0.32                                    | +                                         | 12.35                                          | 6.68E-04                                   | 1.35E-02                           |
| positive regulation of developmental pigmentation (GO:0048087)                          | 9                                     | 3                                  | 0.24                                    | +                                         | 12.35                                          | 3.33E-03                                   | 4.83E-02                           |
| positive regulation of non-canonical Wnt signaling pathway (GO:2000052)                 | 12                                    | 4                                  | 0.32                                    | +                                         | 12.35                                          | 6.68E-04                                   | 1.35E-02                           |
| regulation of branching involved in salivary gland morphogenesis (GO:0060693)           | 9                                     | 3                                  | 0.24                                    | +                                         | 12.35                                          | 3.33E-03                                   | 4.82E-02                           |
| regulation of cell-cell adhesion involved in gastrulation (GO:0070587)                  | 9                                     | 3                                  | 0.24                                    | +                                         | 12.35                                          | 3.33E-03                                   | 4.85E-02                           |
| regulation of pigment cell differentiation (GO:0050932)                                 | 9                                     | 3                                  | 0.24                                    | +                                         | 12.35                                          | 3.33E-03                                   | 4.84E-02                           |
| retina vasculature morphogenesis in camera-type eye (GO:0061299)                        | 9                                     | 3                                  | 0.24                                    | +                                         | 12.35                                          | 3.33E-03                                   | 4.83E-02                           |
| skin morphogenesis (GO:0043589)                                                         | 9                                     | 3                                  | 0.24                                    | +                                         | 12.35                                          | 3.33E-03                                   | 4.84E-02                           |
| outflow tract septum morphogenesis (GO:0003148)                                         | 25                                    | 8                                  | 0.67                                    | +                                         | 11.85                                          | 1.69E-06                                   | 7.28E-05                           |
| <b>semi-lunar valve development (GO:1905314)</b>                                        | 16                                    | 5                                  | 0.43                                    | +                                         | 11.58                                          | 1.77E-04                                   | 4.31E-03                           |
| cardioblast differentiation (GO:0010002)                                                | 13                                    | 4                                  | 0.35                                    | +                                         | 11.4                                           | 8.56E-04                                   | 1.66E-02                           |

Continued

Supplementary Table SVII Continued

| GO biological process complete                                                          | Homo sapiens - REFLIST (21042) | Client Text Box Input (568) | Client Text Box Input (expected) | Client Text Box Input (over/under) | Client Text Box Input (fold Enrichment) | Client Text Box Input (raw P-value) | Client Text Box Input (FDR) |
|-----------------------------------------------------------------------------------------|--------------------------------|-----------------------------|----------------------------------|------------------------------------|-----------------------------------------|-------------------------------------|-----------------------------|
| <b>positive regulation of urine volume (GO:0035810)</b>                                 | 13                             | 4                           | 0.35                             | +                                  | 11.4                                    | 8.56E-04                            | 1.65E-02                    |
| regulation of glomerulus development (GO:0090192)                                       | 13                             | 4                           | 0.35                             | +                                  | 11.4                                    | 8.56E-04                            | 1.66E-02                    |
| regulation of nephron tubule epithelial cell differentiation (GO:0072182)               | 13                             | 4                           | 0.35                             | +                                  | 11.4                                    | 8.56E-04                            | 1.66E-02                    |
| regulation of Wnt signaling pathway, planar cell polarity pathway (GO:2000095)          | 13                             | 4                           | 0.35                             | +                                  | 11.4                                    | 8.56E-04                            | 1.66E-02                    |
| epiboly involved in wound healing (GO:0090505)                                          | 23                             | 7                           | 0.62                             | +                                  | 11.27                                   | 1.01E-05                            | 3.56E-04                    |
| regulation of metanephros development (GO:0072215)                                      | 23                             | 7                           | 0.62                             | +                                  | 11.27                                   | 1.01E-05                            | 3.57E-04                    |
| wound healing, spreading of cells (GO:0044319)                                          | 23                             | 7                           | 0.62                             | +                                  | 11.27                                   | 1.01E-05                            | 3.55E-04                    |
| regulation of axon extension involved in axon guidance (GO:0048841)                     | 17                             | 5                           | 0.46                             | +                                  | 10.9                                    | 2.24E-04                            | 5.24E-03                    |
| retina vasculature development in camera-type eye (GO:0061298)                          | 17                             | 5                           | 0.46                             | +                                  | 10.9                                    | 2.24E-04                            | 5.23E-03                    |
| epiboly (GO:0090504)                                                                    | 24                             | 7                           | 0.65                             | +                                  | 10.81                                   | 1.27E-05                            | 4.33E-04                    |
| <b>regulation of smooth muscle cell migration (GO:0014910)</b>                          | 59                             | 17                          | 1.59                             | +                                  | 10.67                                   | 9.78E-12                            | 9.91E-10                    |
| <b>negative regulation of sodium ion transport (GO:0010766)</b>                         | 14                             | 4                           | 0.38                             | +                                  | 10.58                                   | 1.08E-03                            | 1.98E-02                    |
| blood vessel remodeling (GO:0001974)                                                    | 32                             | 9                           | 0.86                             | +                                  | 10.42                                   | 9.30E-07                            | 4.20E-05                    |
| <b>negative chemotaxis (GO:0050919)</b>                                                 | 36                             | 10                          | 0.97                             | +                                  | 10.29                                   | 2.53E-07                            | 1.27E-05                    |
| response to corticosterone (GO:0051412)                                                 | 18                             | 5                           | 0.49                             | +                                  | 10.29                                   | 2.80E-04                            | 6.40E-03                    |
| <b>endoderm development (GO:0007492)</b>                                                | 76                             | 21                          | 2.05                             | +                                  | 10.24                                   | 7.03E-14                            | 1.01E-11                    |
| endothelial cell proliferation (GO:0001935)                                             | 22                             | 6                           | 0.59                             | +                                  | 10.1                                    | 7.39E-05                            | 2.01E-03                    |
| <b>positive regulation of pri-miRNA transcription by RNA polymerase II (GO:1902895)</b> | 22                             | 6                           | 0.59                             | +                                  | 10.1                                    | 7.39E-05                            | 2.01E-03                    |
| regulation of axon guidance (GO:1902667)                                                | 22                             | 6                           | 0.59                             | +                                  | 10.1                                    | 7.39E-05                            | 2.01E-03                    |
| <b>positive regulation of cardiocyte differentiation (GO:1905209)</b>                   | 26                             | 7                           | 0.7                              | +                                  | 9.97                                    | 1.97E-05                            | 6.26E-04                    |
| cell migration involved in gastrulation (GO:0042074)                                    | 15                             | 4                           | 0.4                              | +                                  | 9.88                                    | 1.34E-03                            | 2.38E-02                    |
| cell migration involved in sprouting angiogenesis (GO:0002042)                          | 15                             | 4                           | 0.4                              | +                                  | 9.88                                    | 1.34E-03                            | 2.38E-02                    |
| <b>negative regulation of bone remodeling (GO:0046851)</b>                              | 15                             | 4                           | 0.4                              | +                                  | 9.88                                    | 1.34E-03                            | 2.38E-02                    |
| vascular endothelial growth factor signaling pathway (GO:0038084)                       | 15                             | 4                           | 0.4                              | +                                  | 9.88                                    | 1.34E-03                            | 2.39E-02                    |
| blastoderm segmentation (GO:0007350)                                                    | 19                             | 5                           | 0.51                             | +                                  | 9.75                                    | 3.46E-04                            | 7.68E-03                    |

Continued

**Supplementary Table SVII Continued**

| <b>GO biological process complete</b>                                                         | <b>Homo sapiens - REFLIST (21042)</b> | <b>Client Text Box Input (568)</b> | <b>Client Text Box Input (expected)</b> | <b>Client Text Box Input (over/under)</b> | <b>Client Text Box Input (fold Enrichment)</b> | <b>Client Text Box Input (raw P-value)</b> | <b>Client Text Box Input (FDR)</b> |
|-----------------------------------------------------------------------------------------------|---------------------------------------|------------------------------------|-----------------------------------------|-------------------------------------------|------------------------------------------------|--------------------------------------------|------------------------------------|
| negative regulation of platelet-derived growth factor receptor signaling pathway (GO:0010642) | 16                                    | 4                                  | 0.43                                    | +                                         | 9.26                                           | 1.64E-03                                   | 2.76E-02                           |
| negative regulation of sprouting angiogenesis (GO:1903671)                                    | 16                                    | 4                                  | 0.43                                    | +                                         | 9.26                                           | 1.64E-03                                   | 2.76E-02                           |
| <b>positive regulation of fibroblast proliferation (GO:0048146)</b>                           | 52                                    | 13                                 | 1.4                                     | +                                         | 9.26                                           | 1.17E-08                                   | 7.70E-07                           |
| <b>positive regulation of kidney development (GO:0090184)</b>                                 | 40                                    | 10                                 | 1.08                                    | +                                         | 9.26                                           | 5.80E-07                                   | 2.76E-05                           |
| <b>regulation of mesoderm development (GO:2000380)</b>                                        | 16                                    | 4                                  | 0.43                                    | +                                         | 9.26                                           | 1.64E-03                                   | 2.77E-02                           |
| <b>regulation of vascular associated smooth muscle cell migration (GO:1904752)</b>            | 16                                    | 4                                  | 0.43                                    | +                                         | 9.26                                           | 1.64E-03                                   | 2.77E-02                           |
| trophoblast cell differentiation (GO:0001829)                                                 | 16                                    | 4                                  | 0.43                                    | +                                         | 9.26                                           | 1.64E-03                                   | 2.77E-02                           |
| <b>sprouting angiogenesis (GO:0002040)</b>                                                    | 45                                    | 11                                 | 1.21                                    | +                                         | 9.06                                           | 1.92E-07                                   | 9.93E-06                           |
| <b>formation of primary germ layer (GO:0001704)</b>                                           | 115                                   | 28                                 | 3.1                                     | +                                         | 9.02                                           | 7.56E-17                                   | 1.54E-14                           |
| <b>response to mineralocorticoid (GO:0051385)</b>                                             | 29                                    | 7                                  | 0.78                                    | +                                         | 8.94                                           | 3.59E-05                                   | 1.05E-03                           |
| negative regulation of embryonic development (GO:0045992)                                     | 25                                    | 6                                  | 0.67                                    | +                                         | 8.89                                           | 1.35E-04                                   | 3.42E-03                           |
| pharyngeal system development (GO:0060037)                                                    | 25                                    | 6                                  | 0.67                                    | +                                         | 8.89                                           | 1.35E-04                                   | 3.42E-03                           |
| atrioventricular valve morphogenesis (GO:0003181)                                             | 21                                    | 5                                  | 0.57                                    | +                                         | 8.82                                           | 5.13E-04                                   | 1.07E-02                           |
| metanephric nephron morphogenesis (GO:0072273)                                                | 21                                    | 5                                  | 0.57                                    | +                                         | 8.82                                           | 5.13E-04                                   | 1.08E-02                           |
| regulation of non-canonical Wnt signaling pathway (GO:2000050)                                | 21                                    | 5                                  | 0.57                                    | +                                         | 8.82                                           | 5.13E-04                                   | 1.07E-02                           |
| uterus development (GO:0060065)                                                               | 21                                    | 5                                  | 0.57                                    | +                                         | 8.82                                           | 5.13E-04                                   | 1.08E-02                           |
| <b>actin-myosin filament sliding (GO:0033275)</b>                                             | 38                                    | 9                                  | 1.03                                    | +                                         | 8.77                                           | 3.14E-06                                   | 1.28E-04                           |
| <b>muscle filament sliding (GO:0030049)</b>                                                   | 38                                    | 9                                  | 1.03                                    | +                                         | 8.77                                           | 3.14E-06                                   | 1.27E-04                           |
| <b>regulation of gastrulation (GO:0010470)</b>                                                | 38                                    | 9                                  | 1.03                                    | +                                         | 8.77                                           | 3.14E-06                                   | 1.28E-04                           |
| hormone catabolic process (GO:0042447)                                                        | 17                                    | 4                                  | 0.46                                    | +                                         | 8.72                                           | 1.98E-03                                   | 3.23E-02                           |
| <b>positive regulation of stem cell differentiation (GO:2000738)</b>                          | 17                                    | 4                                  | 0.46                                    | +                                         | 8.72                                           | 1.98E-03                                   | 3.24E-02                           |
| post-embryonic animal organ development (GO:0048569)                                          | 17                                    | 4                                  | 0.46                                    | +                                         | 8.72                                           | 1.98E-03                                   | 3.24E-02                           |
| regulation of cell proliferation involved in heart morphogenesis (GO:2000136)                 | 17                                    | 4                                  | 0.46                                    | +                                         | 8.72                                           | 1.98E-03                                   | 3.24E-02                           |
| mesodermal cell differentiation (GO:0048333)                                                  | 26                                    | 6                                  | 0.7                                     | +                                         | 8.55                                           | 1.63E-04                                   | 4.00E-03                           |

Continued

Supplementary Table SV11 Continued

| GO biological process complete                                                            | Homo sapiens<br>- REFLIST<br>(21042) | Client Text<br>Box Input<br>(568) | Client Text<br>Box Input<br>(expected) | Client Text<br>Box Input<br>(over/under) | Client Text<br>Box Input (fold<br>Enrichment) | Client Text<br>Box Input (raw<br>P-value) | Client Text<br>Box Input<br>(FDR) |
|-------------------------------------------------------------------------------------------|--------------------------------------|-----------------------------------|----------------------------------------|------------------------------------------|-----------------------------------------------|-------------------------------------------|-----------------------------------|
| regulation of vascular smooth muscle cell proliferation (GO:1904705)                      | 26                                   | 6                                 | 0.7                                    | +                                        | 8.55                                          | 1.63E-04                                  | 3.99E-03                          |
| positive regulation of smooth muscle cell proliferation (GO:0048661)                      | 74                                   | 17                                | 2                                      | +                                        | 8.51                                          | 2.04E-10                                  | 1.84E-08                          |
| negative regulation of blood coagulation (GO:0030195)                                     | 48                                   | 11                                | 1.3                                    | +                                        | 8.49                                          | 3.35E-07                                  | 1.67E-05                          |
| negative regulation of hemostasis (GO:1900047)                                            | 48                                   | 11                                | 1.3                                    | +                                        | 8.49                                          | 3.35E-07                                  | 1.67E-05                          |
| positive regulation of smooth muscle cell migration (GO:0014911)                          | 35                                   | 8                                 | 0.94                                   | +                                        | 8.47                                          | 1.40E-05                                  | 4.69E-04                          |
| cardiac septum morphogenesis (GO:0060411)                                                 | 66                                   | 15                                | 1.78                                   | +                                        | 8.42                                          | 2.71E-09                                  | 2.05E-07                          |
| extracellular negative regulation of signal transduction (GO:1900116)                     | 18                                   | 4                                 | 0.49                                   | +                                        | 8.23                                          | 2.37E-03                                  | 3.74E-02                          |
| extracellular regulation of signal transduction (GO:1900115)                              | 18                                   | 4                                 | 0.49                                   | +                                        | 8.23                                          | 2.37E-03                                  | 3.74E-02                          |
| female genitalia development (GO:0030540)                                                 | 18                                   | 4                                 | 0.49                                   | +                                        | 8.23                                          | 2.37E-03                                  | 3.74E-02                          |
| heart valve morphogenesis (GO:0003179)                                                    | 36                                   | 8                                 | 0.97                                   | +                                        | 8.23                                          | 1.67E-05                                  | 5.47E-04                          |
| negative regulation of interleukin-8 production (GO:0032717)                              | 18                                   | 4                                 | 0.49                                   | +                                        | 8.23                                          | 2.37E-03                                  | 3.75E-02                          |
| negative regulation of morphogenesis of an epithelium (GO:1905331)                        | 18                                   | 4                                 | 0.49                                   | +                                        | 8.23                                          | 2.37E-03                                  | 3.75E-02                          |
| negative regulation of platelet activation (GO:0010544)                                   | 18                                   | 4                                 | 0.49                                   | +                                        | 8.23                                          | 2.37E-03                                  | 3.73E-02                          |
| positive regulation of cardiac muscle cell differentiation (GO:2000727)                   | 18                                   | 4                                 | 0.49                                   | +                                        | 8.23                                          | 2.37E-03                                  | 3.76E-02                          |
| regulation of epithelial cell differentiation involved in kidney development (GO:2000696) | 18                                   | 4                                 | 0.49                                   | +                                        | 8.23                                          | 2.37E-03                                  | 3.76E-02                          |
| response to magnesium ion (GO:0032026)                                                    | 18                                   | 4                                 | 0.49                                   | +                                        | 8.23                                          | 2.37E-03                                  | 3.75E-02                          |
| ventricular cardiac muscle tissue development (GO:0003229)                                | 54                                   | 12                                | 1.46                                   | +                                        | 8.23                                          | 1.31E-07                                  | 7.00E-06                          |
| regulation of osteoblast proliferation (GO:0033688)                                       | 23                                   | 5                                 | 0.62                                   | +                                        | 8.05                                          | 7.34E-04                                  | 1.46E-02                          |
| regulation of platelet-derived growth factor receptor signaling pathway (GO:0010640)      | 23                                   | 5                                 | 0.62                                   | +                                        | 8.05                                          | 7.34E-04                                  | 1.46E-02                          |
| negative regulation of chemotaxis (GO:0050922)                                            | 37                                   | 8                                 | 1                                      | +                                        | 8.01                                          | 1.98E-05                                  | 6.29E-04                          |
| collagen catabolic process (GO:0030574)                                                   | 65                                   | 14                                | 1.75                                   | +                                        | 7.98                                          | 1.66E-08                                  | 1.06E-06                          |
| regulation of cardiocyte differentiation (GO:1905207)                                     | 42                                   | 9                                 | 1.13                                   | +                                        | 7.94                                          | 6.39E-06                                  | 2.37E-04                          |

Continued

**Supplementary Table SV11 Continued**

| <b>GO biological process complete</b>                                   | <b>Homo sapiens - REFLIST (21042)</b> | <b>Client Text Box Input (568)</b> | <b>Client Text Box Input (expected)</b> | <b>Client Text Box Input (over/under)</b> | <b>Client Text Box Input (fold Enrichment)</b> | <b>Client Text Box Input (raw P-value)</b> | <b>Client Text Box Input (FDR)</b> |
|-------------------------------------------------------------------------|---------------------------------------|------------------------------------|-----------------------------------------|-------------------------------------------|------------------------------------------------|--------------------------------------------|------------------------------------|
| <b>negative regulation of coagulation (GO:0050819)</b>                  | 52                                    | 11                                 | 1.4                                     | +                                         | 7.84                                           | 6.71E-07                                   | 3.14E-05                           |
| axon regeneration (GO:0031103)                                          | 19                                    | 4                                  | 0.51                                    | +                                         | 7.8                                            | 2.81E-03                                   | 4.27E-02                           |
| cardiac center ventricle morphogenesis (GO:0003215)                     | 19                                    | 4                                  | 0.51                                    | +                                         | 7.8                                            | 2.81E-03                                   | 4.27E-02                           |
| cellular response to zinc ion (GO:0071294)                              | 19                                    | 4                                  | 0.51                                    | +                                         | 7.8                                            | 2.81E-03                                   | 4.28E-02                           |
| extracellular matrix assembly (GO:0085029)                              | 19                                    | 4                                  | 0.51                                    | +                                         | 7.8                                            | 2.81E-03                                   | 4.26E-02                           |
| lung alveolus development (GO:0048286)                                  | 38                                    | 8                                  | 1.03                                    | +                                         | 7.8                                            | 2.35E-05                                   | 7.25E-04                           |
| <b>response to muscle stretch (GO:0035994)</b>                          | 19                                    | 4                                  | 0.51                                    | +                                         | 7.8                                            | 2.81E-03                                   | 4.28E-02                           |
| atrioventricular valve development (GO:0003171)                         | 24                                    | 5                                  | 0.65                                    | +                                         | 7.72                                           | 8.68E-04                                   | 1.67E-02                           |
| blood vessel endothelial cell migration (GO:0043534)                    | 24                                    | 5                                  | 0.65                                    | +                                         | 7.72                                           | 8.68E-04                                   | 1.67E-02                           |
| response to hypoxia (GO:0055093)                                        | 24                                    | 5                                  | 0.65                                    | +                                         | 7.72                                           | 8.68E-04                                   | 1.67E-02                           |
| <b>trabecula formation (GO:0060343)</b>                                 | 24                                    | 5                                  | 0.65                                    | +                                         | 7.72                                           | 8.68E-04                                   | 1.67E-02                           |
| <b>extracellular matrix organization (GO:0030198)</b>                   | 314                                   | 65                                 | 8.48                                    | +                                         | 7.67                                           | 4.36E-34                                   | 7.51E-31                           |
| positive regulation of cartilage development (GO:0061036)               | 29                                    | 6                                  | 0.78                                    | +                                         | 7.66                                           | 2.72E-04                                   | 6.24E-03                           |
| positive regulation of histone acetylation (GO:0035066)                 | 29                                    | 6                                  | 0.78                                    | +                                         | 7.66                                           | 2.72E-04                                   | 6.25E-03                           |
| <b>extracellular structure organization (GO:0043062)</b>                | 315                                   | 65                                 | 8.5                                     | +                                         | 7.64                                           | 5.13E-34                                   | 7.96E-31                           |
| multicellular organismal catabolic process (GO:0044243)                 | 73                                    | 15                                 | 1.97                                    | +                                         | 7.61                                           | 8.90E-09                                   | 5.95E-07                           |
| <b>regulation of sprouting angiogenesis (GO:1903670)</b>                | 39                                    | 8                                  | 1.05                                    | +                                         | 7.6                                            | 2.76E-05                                   | 8.38E-04                           |
| regulation of kidney development (GO:0090183)                           | 54                                    | 11                                 | 1.46                                    | +                                         | 7.55                                           | 9.30E-07                                   | 4.22E-05                           |
| atrial septum development (GO:0003283)                                  | 20                                    | 4                                  | 0.54                                    | +                                         | 7.41                                           | 3.30E-03                                   | 4.82E-02                           |
| <b>heart valve development (GO:0003170)</b>                             | 40                                    | 8                                  | 1.08                                    | +                                         | 7.41                                           | 3.24E-05                                   | 9.61E-04                           |
| negative regulation of neural precursor cell proliferation (GO:2000178) | 20                                    | 4                                  | 0.54                                    | +                                         | 7.41                                           | 3.30E-03                                   | 4.84E-02                           |
| negative regulation of Rho protein signal transduction (GO:0035024)     | 20                                    | 4                                  | 0.54                                    | +                                         | 7.41                                           | 3.30E-03                                   | 4.83E-02                           |
| negative regulation of tissue remodeling (GO:0034104)                   | 20                                    | 4                                  | 0.54                                    | +                                         | 7.41                                           | 3.30E-03                                   | 4.84E-02                           |
| positive regulation of peptidyl-lysine acetylation (GO:2000758)         | 30                                    | 6                                  | 0.81                                    | +                                         | 7.41                                           | 3.20E-04                                   | 7.19E-03                           |
| <b>positive regulation of sprouting angiogenesis (GO:1903672)</b>       | 20                                    | 4                                  | 0.54                                    | +                                         | 7.41                                           | 3.30E-03                                   | 4.83E-02                           |
| regulation of catenin import into nucleus (GO:0035412)                  | 25                                    | 5                                  | 0.67                                    | +                                         | 7.41                                           | 1.02E-03                                   | 1.90E-02                           |

Continued



Supplementary Table SVII Continued

| GO biological process complete                                                 | Homo sapiens - REFLIST (21042) | Client Text Box Input (568) | Client Text Box Input (expected) | Client Text Box Input (over/under) | Client Text Box Input (fold Enrichment) | Client Text Box Input (raw P-value) | Client Text Box Input (FDR) |
|--------------------------------------------------------------------------------|--------------------------------|-----------------------------|----------------------------------|------------------------------------|-----------------------------------------|-------------------------------------|-----------------------------|
| <b>regulation of cell adhesion mediated by integrin (GO:0033628)</b>           | 40                             | 8                           | 1.08                             | +                                  | 7.41                                    | 3.24E-05                            | 9.64E-04                    |
| regulation of heterotypic cell-cell adhesion (GO:0034114)                      | 20                             | 4                           | 0.54                             | +                                  | 7.41                                    | 3.30E-03                            | 4.85E-02                    |
| <b>regulation of protein autophosphorylation (GO:0031952)</b>                  | 40                             | 8                           | 1.08                             | +                                  | 7.41                                    | 3.24E-05                            | 9.62E-04                    |
| semaphorin-plexin signaling pathway (GO:0071526)                               | 25                             | 5                           | 0.67                             | +                                  | 7.41                                    | 1.02E-03                            | 1.90E-02                    |
| <b>cardiac chamber morphogenesis (GO:0003206)</b>                              | 121                            | 24                          | 3.27                             | +                                  | 7.35                                    | 6.05E-13                            | 7.22E-11                    |
| <b>regulation of smooth muscle cell proliferation (GO:0048660)</b>             | 116                            | 23                          | 3.13                             | +                                  | 7.35                                    | 1.85E-12                            | 2.07E-10                    |
| response to estrogen (GO:0043627)                                              | 76                             | 15                          | 2.05                             | +                                  | 7.31                                    | 1.43E-08                            | 9.36E-07                    |
| morphogenesis of an epithelial sheet (GO:0020111)                              | 46                             | 9                           | 1.24                             | +                                  | 7.25                                    | 1.22E-05                            | 4.17E-04                    |
| <b>regulation of heart morphogenesis (GO:2000826)</b>                          | 36                             | 7                           | 0.97                             | +                                  | 7.2                                     | 1.18E-04                            | 3.06E-03                    |
| <b>cellular response to cadmium ion (GO:0071276)</b>                           | 31                             | 6                           | 0.84                             | +                                  | 7.17                                    | 3.73E-04                            | 8.18E-03                    |
| <b>regulation of pri-miRNA transcription by RNA polymerase II (GO:1902893)</b> | 31                             | 6                           | 0.84                             | +                                  | 7.17                                    | 3.73E-04                            | 8.17E-03                    |
| substrate-dependent cell migration (GO:0006929)                                | 26                             | 5                           | 0.7                              | +                                  | 7.12                                    | 1.19E-03                            | 2.16E-02                    |
| <b>cardiac muscle tissue morphogenesis (GO:0055008)</b>                        | 63                             | 12                          | 1.7                              | +                                  | 7.06                                    | 5.60E-07                            | 2.69E-05                    |
| <b>gastrulation (GO:0007369)</b>                                               | 158                            | 30                          | 4.26                             | +                                  | 7.03                                    | 2.10E-15                            | 3.88E-13                    |
| ventricular septum morphogenesis (GO:0060412)                                  | 37                             | 7                           | 1                                | +                                  | 7.01                                    | 1.38E-04                            | 3.47E-03                    |
| <b>glomerulus development (GO:0032835)</b>                                     | 53                             | 10                          | 1.43                             | +                                  | 6.99                                    | 5.31E-06                            | 2.02E-04                    |
| mesoderm morphogenesis (GO:0048332)                                            | 69                             | 13                          | 1.86                             | +                                  | 6.98                                    | 2.12E-07                            | 1.09E-05                    |
| multicellular organismal macromolecule metabolic process (GO:0044259)          | 85                             | 16                          | 2.29                             | +                                  | 6.97                                    | 8.54E-09                            | 5.76E-07                    |
| collagen metabolic process (GO:0032963)                                        | 80                             | 15                          | 2.16                             | +                                  | 6.95                                    | 2.61E-08                            | 1.60E-06                    |
| <b>ventricular cardiac muscle tissue morphogenesis (GO:0055010)</b>            | 48                             | 9                           | 1.3                              | +                                  | 6.95                                    | 1.64E-05                            | 5.40E-04                    |
| ventricular septum development (GO:0003281)                                    | 64                             | 12                          | 1.73                             | +                                  | 6.95                                    | 6.49E-07                            | 3.06E-05                    |
| <b>cardiac septum development (GO:0003279)</b>                                 | 97                             | 18                          | 2.62                             | +                                  | 6.87                                    | 1.23E-09                            | 9.85E-08                    |
| apoptotic cell clearance (GO:0043277)                                          | 27                             | 5                           | 0.73                             | +                                  | 6.86                                    | 1.38E-03                            | 2.41E-02                    |
| negative regulation of osteoclast differentiation (GO:0045671)                 | 27                             | 5                           | 0.73                             | +                                  | 6.86                                    | 1.38E-03                            | 2.41E-02                    |
| regulation of fibroblast growth factor receptor signaling pathway (GO:0040036) | 27                             | 5                           | 0.73                             | +                                  | 6.86                                    | 1.38E-03                            | 2.41E-02                    |

Continued

Supplementary Table SVII Continued

| GO biological process complete                                                | Homo sapiens - REFLIST (21042) | Client Text Box Input (568) | Client Text Box Input (expected) | Client Text Box Input (over/under) | Client Text Box Input (fold Enrichment) | Client Text Box Input (raw P-value) | Client Text Box Input (FDR) |
|-------------------------------------------------------------------------------|--------------------------------|-----------------------------|----------------------------------|------------------------------------|-----------------------------------------|-------------------------------------|-----------------------------|
| negative regulation of smooth muscle cell proliferation (GO:0048662)          | 38                             | 7                           | 1.03                             | +                                  | 6.82                                    | 1.59E-04                            | 3.95E-03                    |
| negative regulation of BMP signaling pathway (GO:0030514)                     | 49                             | 9                           | 1.32                             | +                                  | 6.8                                     | 1.90E-05                            | 6.09E-04                    |
| mesenchyme morphogenesis (GO:0072132)                                         | 44                             | 8                           | 1.19                             | +                                  | 6.74                                    | 5.89E-05                            | 1.65E-03                    |
| metanephric nephron development (GO:0072210)                                  | 33                             | 6                           | 0.89                             | +                                  | 6.74                                    | 5.01E-04                            | 1.06E-02                    |
| regulation of collagen biosynthetic process (GO:0032965)                      | 33                             | 6                           | 0.89                             | +                                  | 6.74                                    | 5.01E-04                            | 1.06E-02                    |
| epithelial cell proliferation (GO:0050673)                                    | 83                             | 15                          | 2.24                             | +                                  | 6.7                                     | 4.02E-08                            | 2.35E-06                    |
| regulation of pathway-restricted SMAD protein phosphorylation (GO:0060393)    | 61                             | 11                          | 1.65                             | +                                  | 6.68                                    | 2.66E-06                            | 1.09E-04                    |
| regulation of blood coagulation (GO:0030193)                                  | 89                             | 16                          | 2.4                              | +                                  | 6.66                                    | 1.52E-08                            | 9.81E-07                    |
| regulation of hemostasis (GO:1900046)                                         | 89                             | 16                          | 2.4                              | +                                  | 6.66                                    | 1.52E-08                            | 9.85E-07                    |
| negative regulation of epithelial cell differentiation (GO:0030857)           | 39                             | 7                           | 1.05                             | +                                  | 6.65                                    | 1.84E-04                            | 4.44E-03                    |
| positive regulation of endothelial cell migration (GO:0010595)                | 78                             | 14                          | 2.11                             | +                                  | 6.65                                    | 1.23E-07                            | 6.61E-06                    |
| mesoderm formation (GO:0001707)                                               | 67                             | 12                          | 1.81                             | +                                  | 6.64                                    | 9.98E-07                            | 4.47E-05                    |
| aorta morphogenesis (GO:0035909)                                              | 28                             | 5                           | 0.76                             | +                                  | 6.62                                    | 1.59E-03                            | 2.71E-02                    |
| cell fate commitment involved in formation of primary germ layer (GO:0060795) | 28                             | 5                           | 0.76                             | +                                  | 6.62                                    | 1.59E-03                            | 2.71E-02                    |
| metanephros morphogenesis (GO:0003338)                                        | 28                             | 5                           | 0.76                             | +                                  | 6.62                                    | 1.59E-03                            | 2.70E-02                    |
| negative regulation of cytokine biosynthetic process (GO:0042036)             | 28                             | 5                           | 0.76                             | +                                  | 6.62                                    | 1.59E-03                            | 2.70E-02                    |
| regulation of astrocyte differentiation (GO:0048710)                          | 28                             | 5                           | 0.76                             | +                                  | 6.62                                    | 1.59E-03                            | 2.71E-02                    |
| cardiac ventricle development (GO:0003231)                                    | 119                            | 21                          | 3.21                             | +                                  | 6.54                                    | 1.16E-10                            | 1.06E-08                    |
| outflow tract morphogenesis (GO:0003151)                                      | 68                             | 12                          | 1.84                             | +                                  | 6.54                                    | 1.15E-06                            | 5.11E-05                    |
| platelet-derived growth factor receptor signaling pathway (GO:0048008)        | 34                             | 6                           | 0.92                             | +                                  | 6.54                                    | 5.76E-04                            | 1.19E-02                    |
| muscle tissue morphogenesis (GO:0060415)                                      | 74                             | 13                          | 2                                | +                                  | 6.51                                    | 4.30E-07                            | 2.09E-05                    |
| muscle organ morphogenesis (GO:0048644)                                       | 81                             | 14                          | 2.19                             | +                                  | 6.4                                     | 1.85E-07                            | 9.71E-06                    |
| salivary gland morphogenesis (GO:0007435)                                     | 29                             | 5                           | 0.78                             | +                                  | 6.39                                    | 1.83E-03                            | 3.05E-02                    |
| tissue remodeling (GO:0048771)                                                | 93                             | 16                          | 2.51                             | +                                  | 6.37                                    | 2.63E-08                            | 1.60E-06                    |
| cardiac atrium development (GO:0003230)                                       | 35                             | 6                           | 0.94                             | +                                  | 6.35                                    | 6.60E-04                            | 1.34E-02                    |

Continued

Supplementary Table SVII Continued

| GO biological process complete                                                | Homo sapiens<br>- REFLIST<br>(21042) | Client Text<br>Box Input<br>(568) | Client Text<br>Box Input<br>(expected) | Client Text<br>Box Input<br>(over/under) | Client Text<br>Box Input (fold<br>Enrichment) | Client Text<br>Box Input (raw<br>P-value) | Client Text<br>Box Input<br>(FDR) |
|-------------------------------------------------------------------------------|--------------------------------------|-----------------------------------|----------------------------------------|------------------------------------------|-----------------------------------------------|-------------------------------------------|-----------------------------------|
| <b>neural crest cell migration (GO:0001755)</b>                               | 35                                   | 6                                 | 0.94                                   | +                                        | 6.35                                          | 6.60E-04                                  | 1.35E-02                          |
| response to fluid shear stress (GO:0034405)                                   | 35                                   | 6                                 | 0.94                                   | +                                        | 6.35                                          | 6.60E-04                                  | 1.34E-02                          |
| <b>positive regulation of epithelial cell migration (GO:0010634)</b>          | 117                                  | 20                                | 3.16                                   | +                                        | 6.33                                          | 5.29E-10                                  | 4.41E-08                          |
| <b>regulation of BMP signaling pathway (GO:0030510)</b>                       | 88                                   | 15                                | 2.38                                   | +                                        | 6.31                                          | 7.97E-08                                  | 4.40E-06                          |
| <b>regulation of coagulation (GO:0050818)</b>                                 | 94                                   | 16                                | 2.54                                   | +                                        | 6.31                                          | 3.00E-08                                  | 1.80E-06                          |
| <b>tissue migration (GO:0090130)</b>                                          | 88                                   | 15                                | 2.38                                   | +                                        | 6.31                                          | 7.97E-08                                  | 4.41E-06                          |
| endothelial cell migration (GO:0043542)                                       | 59                                   | 10                                | 1.59                                   | +                                        | 6.28                                          | 1.23E-05                                  | 4.20E-04                          |
| <b>cardiac chamber development (GO:0003205)</b>                               | 156                                  | 26                                | 4.21                                   | +                                        | 6.17                                          | 2.23E-12                                  | 2.45E-10                          |
| cellular response to vascular endothelial growth factor stimulus (GO:0035924) | 30                                   | 5                                 | 0.81                                   | +                                        | 6.17                                          | 2.08E-03                                  | 3.37E-02                          |
| coronary vasculature development (GO:0060976)                                 | 42                                   | 7                                 | 1.13                                   | +                                        | 6.17                                          | 2.75E-04                                  | 6.30E-03                          |
| <b>positive regulation of endothelial cell proliferation (GO:0001938)</b>     | 78                                   | 13                                | 2.11                                   | +                                        | 6.17                                          | 7.33E-07                                  | 3.38E-05                          |
| positive regulation of protein acetylation (GO:1901985)                       | 36                                   | 6                                 | 0.97                                   | +                                        | 6.17                                          | 7.53E-04                                  | 1.49E-02                          |
| regulation of cardiac muscle cell differentiation (GO:2000725)                | 30                                   | 5                                 | 0.81                                   | +                                        | 6.17                                          | 2.08E-03                                  | 3.38E-02                          |
| <b>regulation of endothelial cell proliferation (GO:0001936)</b>              | 108                                  | 18                                | 2.92                                   | +                                        | 6.17                                          | 5.52E-09                                  | 3.91E-07                          |
| SMAD protein signal transduction (GO:0060395)                                 | 60                                   | 10                                | 1.62                                   | +                                        | 6.17                                          | 1.40E-05                                  | 4.68E-04                          |
| <b>negative regulation of wound healing (GO:0061045)</b>                      | 67                                   | 11                                | 1.81                                   | +                                        | 6.08                                          | 5.94E-06                                  | 2.22E-04                          |
| <b>regulation of endothelial cell migration (GO:0010594)</b>                  | 128                                  | 21                                | 3.46                                   | +                                        | 6.08                                          | 3.82E-10                                  | 3.31E-08                          |
| <b>vasculogenesis (GO:0001570)</b>                                            | 67                                   | 11                                | 1.81                                   | +                                        | 6.08                                          | 5.94E-06                                  | 2.23E-04                          |
| negative regulation of ERK1 and ERK2 cascade (GO:0070373)                     | 61                                   | 10                                | 1.65                                   | +                                        | 6.07                                          | 1.59E-05                                  | 5.23E-04                          |
| multicellular organism metabolic process (GO:0044236)                         | 105                                  | 17                                | 2.83                                   | +                                        | 6                                             | 2.15E-08                                  | 1.34E-06                          |
| cardiac atrium morphogenesis (GO:0003209)                                     | 31                                   | 5                                 | 0.84                                   | +                                        | 5.98                                          | 2.37E-03                                  | 3.76E-02                          |
| cellular response to dexamethasone stimulus (GO:0071549)                      | 31                                   | 5                                 | 0.84                                   | +                                        | 5.98                                          | 2.37E-03                                  | 3.78E-02                          |
| cellular response to hydrogen peroxide (GO:0070301)                           | 62                                   | 10                                | 1.67                                   | +                                        | 5.98                                          | 1.80E-05                                  | 5.85E-04                          |
| <b>regulation of cartilage development (GO:0061035)</b>                       | 62                                   | 10                                | 1.67                                   | +                                        | 5.98                                          | 1.80E-05                                  | 5.84E-04                          |

Continued

Supplementary Table SVII Continued

| GO biological process complete                                                            | Homo sapiens - REFLIST (21042) | Client Text Box Input (568) | Client Text Box Input (expected) | Client Text Box Input (over/under) | Client Text Box Input (fold Enrichment) | Client Text Box Input (raw P-value) | Client Text Box Input (FDR) |
|-------------------------------------------------------------------------------------------|--------------------------------|-----------------------------|----------------------------------|------------------------------------|-----------------------------------------|-------------------------------------|-----------------------------|
| regulation of DNA damage response, signal transduction by p53 class mediator (GO:0043516) | 31                             | 5                           | 0.84                             | +                                  | 5.98                                    | 2.37E-03                            | 3.78E-02                    |
| response to gonadotropin (GO:0034698)                                                     | 31                             | 5                           | 0.84                             | +                                  | 5.98                                    | 2.37E-03                            | 3.77E-02                    |
| response to increased oxygen levels (GO:0036296)                                          | 31                             | 5                           | 0.84                             | +                                  | 5.98                                    | 2.37E-03                            | 3.77E-02                    |
| negative regulation of response to cytokine stimulus (GO:0060761)                         | 56                             | 9                           | 1.51                             | +                                  | 5.95                                    | 4.85E-05                            | 1.39E-03                    |
| heterophilic cell-cell adhesion via plasma membrane cell adhesion molecules (GO:0007157)  | 50                             | 8                           | 1.35                             | +                                  | 5.93                                    | 1.31E-04                            | 3.33E-03                    |
| positive regulation of epithelial to mesenchymal transition (GO:0010718)                  | 44                             | 7                           | 1.19                             | +                                  | 5.89                                    | 3.55E-04                            | 7.85E-03                    |
| cardiac muscle tissue development (GO:0048738)                                            | 158                            | 25                          | 4.26                             | +                                  | 5.86                                    | 1.62E-11                            | 1.61E-09                    |
| positive regulation of glial cell differentiation (GO:0045687)                            | 38                             | 6                           | 1.03                             | +                                  | 5.85                                    | 9.70E-04                            | 1.83E-02                    |
| regulation of collagen metabolic process (GO:0010712)                                     | 38                             | 6                           | 1.03                             | +                                  | 5.85                                    | 9.70E-04                            | 1.82E-02                    |
| anterior/posterior axis specification (GO:0009948)                                        | 51                             | 8                           | 1.38                             | +                                  | 5.81                                    | 1.48E-04                            | 3.70E-03                    |
| regulation of fibroblast proliferation (GO:0048145)                                       | 83                             | 13                          | 2.24                             | +                                  | 5.8                                     | 1.37E-06                            | 5.98E-05                    |
| negative regulation of receptor activity (GO:2000272)                                     | 32                             | 5                           | 0.86                             | +                                  | 5.79                                    | 2.68E-03                            | 4.11E-02                    |
| regulation of platelet activation (GO:0010543)                                            | 32                             | 5                           | 0.86                             | +                                  | 5.79                                    | 2.68E-03                            | 4.10E-02                    |
| smooth muscle cell differentiation (GO:0051145)                                           | 32                             | 5                           | 0.86                             | +                                  | 5.79                                    | 2.68E-03                            | 4.11E-02                    |
| response to hydrogen peroxide (GO:0042542)                                                | 109                            | 17                          | 2.94                             | +                                  | 5.78                                    | 3.51E-08                            | 2.08E-06                    |
| aorta development (GO:0035904)                                                            | 45                             | 7                           | 1.21                             | +                                  | 5.76                                    | 4.01E-04                            | 8.69E-03                    |
| actin-mediated cell contraction (GO:0070252)                                              | 84                             | 13                          | 2.27                             | +                                  | 5.73                                    | 1.54E-06                            | 6.68E-05                    |
| animal organ regeneration (GO:0031100)                                                    | 78                             | 12                          | 2.11                             | +                                  | 5.7                                     | 4.11E-06                            | 1.62E-04                    |
| negative regulation of cytokine-mediated signaling pathway (GO:0001960)                   | 52                             | 8                           | 1.4                              | +                                  | 5.7                                     | 1.67E-04                            | 4.08E-03                    |
| negative regulation of response to wounding (GO:1903035)                                  | 78                             | 12                          | 2.11                             | +                                  | 5.7                                     | 4.11E-06                            | 1.62E-04                    |
| regulation of multicellular organismal metabolic process (GO:0044246)                     | 39                             | 6                           | 1.05                             | +                                  | 5.7                                     | 1.09E-03                            | 2.01E-02                    |
| heart morphogenesis (GO:0003007)                                                          | 228                            | 35                          | 6.15                             | +                                  | 5.69                                    | 3.01E-15                            | 5.30E-13                    |
| cardiac ventricle morphogenesis (GO:0003208)                                              | 72                             | 11                          | 1.94                             | +                                  | 5.66                                    | 1.09E-05                            | 3.81E-04                    |
| artery morphogenesis (GO:0048844)                                                         | 59                             | 9                           | 1.59                             | +                                  | 5.65                                    | 6.97E-05                            | 1.92E-03                    |
| neural crest cell development (GO:0014032)                                                | 59                             | 9                           | 1.59                             | +                                  | 5.65                                    | 6.97E-05                            | 1.93E-03                    |
| regulation of systemic arterial blood pressure mediated by a chemical signal (GO:0003044) | 46                             | 7                           | 1.24                             | +                                  | 5.64                                    | 4.51E-04                            | 9.68E-03                    |
| extracellular matrix disassembly (GO:0022617)                                             | 79                             | 12                          | 2.13                             | +                                  | 5.63                                    | 4.62E-06                            | 1.79E-04                    |

Continued

Supplementary Table SVII Continued

| GO biological process complete                                                      | Homo sapiens<br>- REFLIST<br>(21042) | Client Text<br>Box Input<br>(568) | Client Text<br>Box Input<br>(expected) | Client Text<br>Box Input<br>(over/under) | Client Text<br>Box Input (fold<br>Enrichment) | Client Text<br>Box Input (raw<br>P-value) | Client Text<br>Box Input<br>(FDR) |
|-------------------------------------------------------------------------------------|--------------------------------------|-----------------------------------|----------------------------------------|------------------------------------------|-----------------------------------------------|-------------------------------------------|-----------------------------------|
| <b>angiogenesis (GO:0001525)</b>                                                    | 297                                  | 45                                | 8.02                                   | +                                        | 5.61                                          | 4.51E-19                                  | 1.25E-16                          |
| muscle adaptation (GO:0043500)                                                      | 33                                   | 5                                 | 0.89                                   | +                                        | 5.61                                          | 3.02E-03                                  | 4.54E-02                          |
| positive regulation of BMP signaling pathway (GO:0030513)                           | 33                                   | 5                                 | 0.89                                   | +                                        | 5.61                                          | 3.02E-03                                  | 4.53E-02                          |
| positive regulation of morphogenesis of an epithelium (GO:1905332)                  | 33                                   | 5                                 | 0.89                                   | +                                        | 5.61                                          | 3.02E-03                                  | 4.54E-02                          |
| <b>salivary gland development (GO:0007431)</b>                                      | 33                                   | 5                                 | 0.89                                   | +                                        | 5.61                                          | 3.02E-03                                  | 4.54E-02                          |
| <b>blood vessel development (GO:0001568)</b>                                        | 466                                  | 70                                | 12.58                                  | +                                        | 5.56                                          | 5.07E-29                                  | 5.24E-26                          |
| regulation of actin filament-based movement (GO:1903115)                            | 40                                   | 6                                 | 1.08                                   | +                                        | 5.56                                          | 1.23E-03                                  | 2.22E-02                          |
| <b>neural crest cell differentiation (GO:0014033)</b>                               | 67                                   | 10                                | 1.81                                   | +                                        | 5.53                                          | 3.28E-05                                  | 9.69E-04                          |
| <b>vasculature development (GO:001944)</b>                                          | 490                                  | 73                                | 13.23                                  | +                                        | 5.52                                          | 4.74E-30                                  | 5.65E-27                          |
| <b>cellular response to transforming growth factor beta stimulus (GO:0071560)</b>   | 142                                  | 21                                | 3.83                                   | +                                        | 5.48                                          | 2.04E-09                                  | 1.59E-07                          |
| <b>blood vessel morphogenesis (GO:0048514)</b>                                      | 386                                  | 57                                | 10.42                                  | +                                        | 5.47                                          | 2.05E-23                                  | 1.10E-20                          |
| embryonic placenta development (GO:0001892)                                         | 88                                   | 13                                | 2.38                                   | +                                        | 5.47                                          | 2.45E-06                                  | 1.02E-04                          |
| <b>negative regulation of vasculature development (GO:1901343)</b>                  | 95                                   | 14                                | 2.56                                   | +                                        | 5.46                                          | 1.04E-06                                  | 4.64E-05                          |
| negative regulation of Notch signaling pathway (GO:0045746)                         | 34                                   | 5                                 | 0.92                                   | +                                        | 5.45                                          | 3.39E-03                                  | 4.89E-02                          |
| positive regulation of protein dephosphorylation (GO:0035307)                       | 34                                   | 5                                 | 0.92                                   | +                                        | 5.45                                          | 3.39E-03                                  | 4.88E-02                          |
| regulation of animal organ formation (GO:0003156)                                   | 34                                   | 5                                 | 0.92                                   | +                                        | 5.45                                          | 3.39E-03                                  | 4.88E-02                          |
| <b>positive regulation of cell-substrate adhesion (GO:0010811)</b>                  | 109                                  | 16                                | 2.94                                   | +                                        | 5.44                                          | 1.86E-07                                  | 9.72E-06                          |
| positive regulation of cardiac muscle tissue development (GO:0055025)               | 41                                   | 6                                 | 1.11                                   | +                                        | 5.42                                          | 1.38E-03                                  | 2.41E-02                          |
| <b>cardiovascular system development (GO:0072358)</b>                               | 500                                  | 73                                | 13.5                                   | +                                        | 5.41                                          | 1.48E-29                                  | 1.64E-26                          |
| endocrine process (GO:0050886)                                                      | 48                                   | 7                                 | 1.3                                    | +                                        | 5.4                                           | 5.68E-04                                  | 1.18E-02                          |
| positive regulation of pathway-restricted SMAD protein phosphorylation (GO:0010862) | 48                                   | 7                                 | 1.3                                    | +                                        | 5.4                                           | 5.68E-04                                  | 1.17E-02                          |
| <b>trabecula morphogenesis (GO:0061383)</b>                                         | 48                                   | 7                                 | 1.3                                    | +                                        | 5.4                                           | 5.68E-04                                  | 1.17E-02                          |
| <b>regulation of epithelial cell migration (GO:0010632)</b>                         | 186                                  | 27                                | 5.02                                   | +                                        | 5.38                                          | 1.48E-11                                  | 1.48E-09                          |
| <b>artery development (GO:0060840)</b>                                              | 77                                   | 11                                | 2.08                                   | +                                        | 5.29                                          | 1.93E-05                                  | 6.15E-04                          |

Continued

**Supplementary Table SVII Continued**

| <b>GO biological process complete</b>                                                       | <b>Homo sapiens - REFLIST (21042)</b> | <b>Client Text Box Input (568)</b> | <b>Client Text Box Input (expected)</b> | <b>Client Text Box Input (over/under)</b> | <b>Client Text Box Input (fold Enrichment)</b> | <b>Client Text Box Input (raw P-value)</b> | <b>Client Text Box Input (FDR)</b> |
|---------------------------------------------------------------------------------------------|---------------------------------------|------------------------------------|-----------------------------------------|-------------------------------------------|------------------------------------------------|--------------------------------------------|------------------------------------|
| mammary gland morphogenesis (GO:0060443)                                                    | 42                                    | 6                                  | 1.13                                    | +                                         | 5.29                                           | 1.54E-03                                   | 2.65E-02                           |
| <b>mesenchymal cell development (GO:0014031)</b>                                            | 63                                    | 9                                  | 1.7                                     | +                                         | 5.29                                           | 1.10E-04                                   | 2.86E-03                           |
| positive regulation of receptor-mediated endocytosis (GO:0048260)                           | 49                                    | 7                                  | 1.32                                    | +                                         | 5.29                                           | 6.35E-04                                   | 1.30E-02                           |
| response to dexamethasone (GO:0071548)                                                      | 42                                    | 6                                  | 1.13                                    | +                                         | 5.29                                           | 1.54E-03                                   | 2.64E-02                           |
| <b>response to transforming growth factor beta (GO:0071559)</b>                             | 147                                   | 21                                 | 3.97                                    | +                                         | 5.29                                           | 3.55E-09                                   | 2.59E-07                           |
| <b>stem cell development (GO:0048864)</b>                                                   | 63                                    | 9                                  | 1.7                                     | +                                         | 5.29                                           | 1.10E-04                                   | 2.86E-03                           |
| <b>mesenchyme development (GO:0060485)</b>                                                  | 190                                   | 27                                 | 5.13                                    | +                                         | 5.26                                           | 2.29E-11                                   | 2.23E-09                           |
| viral entry into host cell (GO:0046718)                                                     | 92                                    | 13                                 | 2.48                                    | +                                         | 5.23                                           | 3.82E-06                                   | 1.51E-04                           |
| epithelial cell migration (GO:0010631)                                                      | 78                                    | 11                                 | 2.11                                    | +                                         | 5.22                                           | 2.15E-05                                   | 6.68E-04                           |
| positive regulation of osteoblast differentiation (GO:0045669)                              | 57                                    | 8                                  | 1.54                                    | +                                         | 5.2                                            | 2.93E-04                                   | 6.66E-03                           |
| regulation of extrinsic apoptotic signaling pathway via death domain receptors (GO:1902041) | 57                                    | 8                                  | 1.54                                    | +                                         | 5.2                                            | 2.93E-04                                   | 6.65E-03                           |
| <b>positive regulation of wound healing (GO:0090303)</b>                                    | 50                                    | 7                                  | 1.35                                    | +                                         | 5.19                                           | 7.07E-04                                   | 1.42E-02                           |
| negative regulation of endothelial cell migration (GO:0010596)                              | 43                                    | 6                                  | 1.16                                    | +                                         | 5.17                                           | 1.72E-03                                   | 2.89E-02                           |
| <b>cellular response to mechanical stimulus (GO:0071260)</b>                                | 79                                    | 11                                 | 2.13                                    | +                                         | 5.16                                           | 2.39E-05                                   | 7.35E-04                           |
| <b>positive regulation of vasculature development (GO:1904018)</b>                          | 158                                   | 22                                 | 4.26                                    | +                                         | 5.16                                           | 2.31E-09                                   | 1.77E-07                           |
| <b>adherens junction organization (GO:0034332)</b>                                          | 72                                    | 10                                 | 1.94                                    | +                                         | 5.15                                           | 5.69E-05                                   | 1.61E-03                           |
| <b>cardiocyte differentiation (GO:0035051)</b>                                              | 108                                   | 15                                 | 2.92                                    | +                                         | 5.15                                           | 8.44E-07                                   | 3.85E-05                           |
| <b>ovulation cycle (GO:0042698)</b>                                                         | 101                                   | 14                                 | 2.73                                    | +                                         | 5.14                                           | 2.00E-06                                   | 8.45E-05                           |
| regulation of interleukin-8 production (GO:0032677)                                         | 65                                    | 9                                  | 1.75                                    | +                                         | 5.13                                           | 1.36E-04                                   | 3.43E-03                           |
| <b>negative regulation of angiogenesis (GO:0016525)</b>                                     | 87                                    | 12                                 | 2.35                                    | +                                         | 5.11                                           | 1.12E-05                                   | 3.88E-04                           |
| <b>negative regulation of cellular response to growth factor stimulus (GO:0090288)</b>      | 131                                   | 18                                 | 3.54                                    | +                                         | 5.09                                           | 7.93E-08                                   | 4.41E-06                           |
| <b>response to progesterone (GO:0032570)</b>                                                | 44                                    | 6                                  | 1.19                                    | +                                         | 5.05                                           | 1.91E-03                                   | 3.14E-02                           |
| epithelium migration (GO:0090132)                                                           | 81                                    | 11                                 | 2.19                                    | +                                         | 5.03                                           | 2.95E-05                                   | 8.89E-04                           |
| <b>peptide cross-linking (GO:0018149)</b>                                                   | 59                                    | 8                                  | 1.59                                    | +                                         | 5.02                                           | 3.62E-04                                   | 7.97E-03                           |
| <b>regulation of cytokine biosynthetic process (GO:0042035)</b>                             | 96                                    | 13                                 | 2.59                                    | +                                         | 5.02                                           | 5.81E-06                                   | 2.19E-04                           |

Continued

Supplementary Table SVII Continued

| GO biological process complete                                                                               | Homo sapiens - REFLIST (21042) | Client Text Box Input (568) | Client Text Box Input (expected) | Client Text Box Input (over/under) | Client Text Box Input (fold Enrichment) | Client Text Box Input (raw P-value) | Client Text Box Input (FDR) |
|--------------------------------------------------------------------------------------------------------------|--------------------------------|-----------------------------|----------------------------------|------------------------------------|-----------------------------------------|-------------------------------------|-----------------------------|
| negative regulation of blood vessel morphogenesis (GO:2000181)                                               | 89                             | 12                          | 2.4                              | +                                  | 4.99                                    | 1.38E-05                            | 4.63E-04                    |
| response to glucocorticoid (GO:0051384)                                                                      | 141                            | 19                          | 3.81                             | +                                  | 4.99                                    | 4.58E-08                            | 2.65E-06                    |
| cardiac muscle cell differentiation (GO:0055007)                                                             | 82                             | 11                          | 2.21                             | +                                  | 4.97                                    | 3.26E-05                            | 9.65E-04                    |
| digestive tract development (GO:0048565)                                                                     | 127                            | 17                          | 3.43                             | +                                  | 4.96                                    | 2.54E-07                            | 1.27E-05                    |
| response to corticosteroid (GO:0031960)                                                                      | 157                            | 21                          | 4.24                             | +                                  | 4.96                                    | 1.01E-08                            | 6.70E-07                    |
| regulation of bone remodeling (GO:0046850)                                                                   | 45                             | 6                           | 1.21                             | +                                  | 4.94                                    | 2.12E-03                            | 3.42E-02                    |
| respiratory tube development (GO:0030323)                                                                    | 173                            | 23                          | 4.67                             | +                                  | 4.93                                    | 2.23E-09                            | 1.73E-07                    |
| ameboid-like cell migration (GO:0001667)                                                                     | 143                            | 19                          | 3.86                             | +                                  | 4.92                                    | 5.60E-08                            | 3.19E-06                    |
| regulation of histone acetylation (GO:0035065)                                                               | 53                             | 7                           | 1.43                             | +                                  | 4.89                                    | 9.66E-04                            | 1.82E-02                    |
| segmentation (GO:0035282)                                                                                    | 91                             | 12                          | 2.46                             | +                                  | 4.89                                    | 1.68E-05                            | 5.50E-04                    |
| regulation of wound healing (GO:0061041)                                                                     | 137                            | 18                          | 3.7                              | +                                  | 4.87                                    | 1.46E-07                            | 7.76E-06                    |
| striated muscle tissue development (GO:0014706)                                                              | 282                            | 37                          | 7.61                             | +                                  | 4.86                                    | 3.96E-14                            | 5.96E-12                    |
| tissue morphogenesis (GO:0048729)                                                                            | 526                            | 69                          | 14.2                             | +                                  | 4.86                                    | 1.69E-25                            | 1.09E-22                    |
| heart process (GO:0003015)                                                                                   | 92                             | 12                          | 2.48                             | +                                  | 4.83                                    | 1.86E-05                            | 5.97E-04                    |
| regulation of muscle hypertrophy (GO:0014743)                                                                | 46                             | 6                           | 1.24                             | +                                  | 4.83                                    | 2.34E-03                            | 3.75E-02                    |
| lung development (GO:0030324)                                                                                | 169                            | 22                          | 4.56                             | +                                  | 4.82                                    | 7.06E-09                            | 4.86E-07                    |
| mesenchymal cell differentiation (GO:0048762)                                                                | 131                            | 17                          | 3.54                             | +                                  | 4.81                                    | 3.78E-07                            | 1.87E-05                    |
| regulation of cell-substrate junction assembly (GO:0090109)                                                  | 54                             | 7                           | 1.46                             | +                                  | 4.8                                     | 1.07E-03                            | 1.96E-02                    |
| regulation of focal adhesion assembly (GO:0051893)                                                           | 54                             | 7                           | 1.46                             | +                                  | 4.8                                     | 1.07E-03                            | 1.97E-02                    |
| regulation of cell-substrate adhesion (GO:0010810)                                                           | 186                            | 24                          | 5.02                             | +                                  | 4.78                                    | 1.71E-09                            | 1.34E-07                    |
| transforming growth factor beta receptor signaling pathway (GO:0007179)                                      | 93                             | 12                          | 2.51                             | +                                  | 4.78                                    | 2.05E-05                            | 6.45E-04                    |
| circulatory system development (GO:0072359)                                                                  | 808                            | 104                         | 21.81                            | +                                  | 4.77                                    | 6.94E-38                            | 1.79E-34                    |
| muscle tissue development (GO:0060537)                                                                       | 295                            | 38                          | 7.96                             | +                                  | 4.77                                    | 3.00E-14                            | 4.61E-12                    |
| positive regulation of cell migration (GO:0030335)                                                           | 429                            | 55                          | 11.58                            | +                                  | 4.75                                    | 4.73E-20                            | 1.41E-17                    |
| leukocyte cell-cell adhesion (GO:0007159)                                                                    | 47                             | 6                           | 1.27                             | +                                  | 4.73                                    | 2.59E-03                            | 3.99E-02                    |
| positive regulation of angiogenesis (GO:0045766)                                                             | 141                            | 18                          | 3.81                             | +                                  | 4.73                                    | 2.15E-07                            | 1.10E-05                    |
| positive regulation of transmembrane receptor protein serine/threonine kinase signaling pathway (GO:0090100) | 102                            | 13                          | 2.75                             | +                                  | 4.72                                    | 1.05E-05                            | 3.68E-04                    |

Continued

**Supplementary Table SVII Continued**

| <b>GO biological process complete</b>                                            | <b>Homo sapiens - REFLIST (21042)</b> | <b>Client Text Box Input (568)</b> | <b>Client Text Box Input (expected)</b> | <b>Client Text Box Input (over/under)</b> | <b>Client Text Box Input (fold Enrichment)</b> | <b>Client Text Box Input (raw P-value)</b> | <b>Client Text Box Input (FDR)</b> |
|----------------------------------------------------------------------------------|---------------------------------------|------------------------------------|-----------------------------------------|-------------------------------------------|------------------------------------------------|--------------------------------------------|------------------------------------|
| negative regulation of cysteine-type endopeptidase activity (GO:2000117)         | 110                                   | 14                                 | 2.97                                    | +                                         | 4.71                                           | 4.91E-06                                   | 1.88E-04                           |
| regulation of interleukin-1 beta production (GO:0032651)                         | 55                                    | 7                                  | 1.48                                    | +                                         | 4.71                                           | 1.18E-03                                   | 2.14E-02                           |
| regulation of morphogenesis of a branching structure (GO:0060688)                | 55                                    | 7                                  | 1.48                                    | +                                         | 4.71                                           | 1.18E-03                                   | 2.14E-02                           |
| <b>cellular response to amino acid stimulus (GO:0071230)</b>                     | 63                                    | 8                                  | 1.7                                     | +                                         | 4.7                                            | 5.39E-04                                   | 1.12E-02                           |
| <b>heart development (GO:0007507)</b>                                            | 481                                   | 61                                 | 12.98                                   | +                                         | 4.7                                            | 6.19E-22                                   | 2.29E-19                           |
| regulation of muscle adaptation (GO:0043502)                                     | 71                                    | 9                                  | 1.92                                    | +                                         | 4.7                                            | 2.48E-04                                   | 5.73E-03                           |
| negative regulation of extrinsic apoptotic signaling pathway (GO:2001237)        | 103                                   | 13                                 | 2.78                                    | +                                         | 4.68                                           | 1.16E-05                                   | 3.98E-04                           |
| <b>positive regulation of protein binding (GO:0032092)</b>                       | 87                                    | 11                                 | 2.35                                    | +                                         | 4.68                                           | 5.33E-05                                   | 1.52E-03                           |
| <b>regulation of vasculature development (GO:1901342)</b>                        | 270                                   | 34                                 | 7.29                                    | +                                         | 4.67                                           | 1.25E-12                                   | 1.42E-10                           |
| <b>positive regulation of cell motility (GO:2000147)</b>                         | 445                                   | 56                                 | 12.01                                   | +                                         | 4.66                                           | 4.63E-20                                   | 1.41E-17                           |
| entry into cell of other organism involved in symbiotic interaction (GO:0051806) | 104                                   | 13                                 | 2.81                                    | +                                         | 4.63                                           | 1.27E-05                                   | 4.32E-04                           |
| entry into host (GO:0044409)                                                     | 104                                   | 13                                 | 2.81                                    | +                                         | 4.63                                           | 1.27E-05                                   | 4.31E-04                           |
| entry into host cell (GO:0030260)                                                | 104                                   | 13                                 | 2.81                                    | +                                         | 4.63                                           | 1.27E-05                                   | 4.30E-04                           |
| entry into other organism involved in symbiotic interaction (GO:0051828)         | 104                                   | 13                                 | 2.81                                    | +                                         | 4.63                                           | 1.27E-05                                   | 4.33E-04                           |
| negative regulation of myeloid leukocyte differentiation (GO:0002762)            | 48                                    | 6                                  | 1.3                                     | +                                         | 4.63                                           | 2.85E-03                                   | 4.31E-02                           |
| positive regulation of DNA replication (GO:0045740)                              | 56                                    | 7                                  | 1.51                                    | +                                         | 4.63                                           | 1.29E-03                                   | 2.32E-02                           |
| <b>regulation of response to wounding (GO:1903034)</b>                           | 160                                   | 20                                 | 4.32                                    | +                                         | 4.63                                           | 6.26E-08                                   | 3.53E-06                           |
| <b>renal system development (GO:0072001)</b>                                     | 272                                   | 34                                 | 7.34                                    | +                                         | 4.63                                           | 1.50E-12                                   | 1.70E-10                           |
| <b>response to reactive oxygen species (GO:0000302)</b>                          | 184                                   | 23                                 | 4.97                                    | +                                         | 4.63                                           | 6.45E-09                                   | 4.50E-07                           |
| <b>gland morphogenesis (GO:0022612)</b>                                          | 97                                    | 12                                 | 2.62                                    | +                                         | 4.58                                           | 2.99E-05                                   | 8.97E-04                           |
| <b>regulation of phosphatidylinositol 3-kinase signaling (GO:0014066)</b>        | 97                                    | 12                                 | 2.62                                    | +                                         | 4.58                                           | 2.99E-05                                   | 9.00E-04                           |
| <b>response to cAMP (GO:0051591)</b>                                             | 97                                    | 12                                 | 2.62                                    | +                                         | 4.58                                           | 2.99E-05                                   | 8.98E-04                           |
| embryonic pattern specification (GO:0009880)                                     | 65                                    | 8                                  | 1.75                                    | +                                         | 4.56                                           | 6.50E-04                                   | 1.33E-02                           |

Continued



Supplementary Table SVII Continued

| GO biological process complete                                                                            | Homo sapiens<br>- REFLIST<br>(21042) | Client Text<br>Box Input<br>(568) | Client Text<br>Box Input<br>(expected) | Client Text<br>Box Input<br>(over/under) | Client Text<br>Box Input (fold<br>Enrichment) | Client Text<br>Box Input (raw<br>P-value) | Client Text<br>Box Input<br>(FDR) |
|-----------------------------------------------------------------------------------------------------------|--------------------------------------|-----------------------------------|----------------------------------------|------------------------------------------|-----------------------------------------------|-------------------------------------------|-----------------------------------|
| cellular response to glucocorticoid stimulus<br>(GO:0071385)                                              | 57                                   | 7                                 | 1.54                                   | +                                        | 4.55                                          | 1.42E-03                                  | 2.47E-02                          |
| cellular response to reactive oxygen species<br>(GO:0034614)                                              | 122                                  | 15                                | 3.29                                   | +                                        | 4.55                                          | 3.34E-06                                  | 1.34E-04                          |
| positive regulation of response to wounding<br>(GO:1903036)                                               | 57                                   | 7                                 | 1.54                                   | +                                        | 4.55                                          | 1.42E-03                                  | 2.47E-02                          |
| positive regulation of striated muscle cell differentiation<br>(GO:0051155)                               | 57                                   | 7                                 | 1.54                                   | +                                        | 4.55                                          | 1.42E-03                                  | 2.47E-02                          |
| regulation of adherens junction organization<br>(GO:1903391)                                              | 57                                   | 7                                 | 1.54                                   | +                                        | 4.55                                          | 1.42E-03                                  | 2.46E-02                          |
| regulation of chemotaxis (GO:0050920)                                                                     | 179                                  | 22                                | 4.83                                   | +                                        | 4.55                                          | 1.81E-08                                  | 1.14E-06                          |
| actin filament-based movement (GO:0030048)                                                                | 106                                  | 13                                | 2.86                                   | +                                        | 4.54                                          | 1.53E-05                                  | 5.05E-04                          |
| positive regulation of cellular component<br>movement (GO:0051272)                                        | 457                                  | 56                                | 12.34                                  | +                                        | 4.54                                          | 1.41E-19                                  | 4.06E-17                          |
| positive regulation of stress fiber assembly<br>(GO:0051496)                                              | 49                                   | 6                                 | 1.32                                   | +                                        | 4.54                                          | 3.12E-03                                  | 4.65E-02                          |
| digestive system development (GO:0055123)                                                                 | 139                                  | 17                                | 3.75                                   | +                                        | 4.53                                          | 8.01E-07                                  | 3.67E-05                          |
| integrin-mediated signaling pathway<br>(GO:0007229)                                                       | 90                                   | 11                                | 2.43                                   | +                                        | 4.53                                          | 7.04E-05                                  | 1.94E-03                          |
| negative regulation of cysteine-type endopeptidase<br>activity involved in apoptotic process (GO:0043154) | 90                                   | 11                                | 2.43                                   | +                                        | 4.53                                          | 7.04E-05                                  | 1.93E-03                          |
| positive regulation of reactive oxygen species<br>metabolic process (GO:2000379)                          | 90                                   | 11                                | 2.43                                   | +                                        | 4.53                                          | 7.04E-05                                  | 1.93E-03                          |
| regulation of cell junction assembly<br>(GO:1901888)                                                      | 82                                   | 10                                | 2.21                                   | +                                        | 4.52                                          | 1.52E-04                                  | 3.78E-03                          |
| cardiac muscle contraction (GO:0060048)                                                                   | 74                                   | 9                                 | 2                                      | +                                        | 4.51                                          | 3.28E-04                                  | 7.35E-03                          |
| hair follicle development (GO:0001942)                                                                    | 74                                   | 9                                 | 2                                      | +                                        | 4.51                                          | 3.28E-04                                  | 7.36E-03                          |
| response to mechanical stimulus (GO:0009612)                                                              | 215                                  | 26                                | 5.8                                    | +                                        | 4.48                                          | 1.25E-09                                  | 9.98E-08                          |
| positive regulation of actin filament bundle<br>assembly (GO:0032233)                                     | 58                                   | 7                                 | 1.57                                   | +                                        | 4.47                                          | 1.56E-03                                  | 2.66E-02                          |
| regulation of peptidyl-lysine acetylation (GO:2000756)                                                    | 58                                   | 7                                 | 1.57                                   | +                                        | 4.47                                          | 1.56E-03                                  | 2.66E-02                          |
| metanephros development (GO:0001656)                                                                      | 83                                   | 10                                | 2.24                                   | +                                        | 4.46                                          | 1.66E-04                                  | 4.07E-03                          |
| positive regulation of ossification (GO:0045778)                                                          | 83                                   | 10                                | 2.24                                   | +                                        | 4.46                                          | 1.66E-04                                  | 4.08E-03                          |
| regulation of cellular response to growth factor<br>stimulus (GO:0090287)                                 | 249                                  | 30                                | 6.72                                   | +                                        | 4.46                                          | 7.20E-11                                  | 6.68E-09                          |
| stem cell differentiation (GO:0048863)                                                                    | 133                                  | 16                                | 3.59                                   | +                                        | 4.46                                          | 2.05E-06                                  | 8.62E-05                          |

Continued

Supplementary Table SV11 Continued

| GO biological process complete                                                                             | Homo sapiens<br>- REFLIST<br>(21042) | Client Text<br>Box Input<br>(568) | Client Text<br>Box Input<br>(expected) | Client Text<br>Box Input<br>(over/under) | Client Text<br>Box Input (fold<br>Enrichment) | Client Text<br>Box Input (raw<br>P-value) | Client Text<br>Box Input<br>(FDR) |
|------------------------------------------------------------------------------------------------------------|--------------------------------------|-----------------------------------|----------------------------------------|------------------------------------------|-----------------------------------------------|-------------------------------------------|-----------------------------------|
| cardiac muscle cell development (GO:0055013)                                                               | 50                                   | 6                                 | 1.35                                   | +                                        | 4.45                                          | 3.42E-03                                  | 4.92E-02                          |
| digestive tract morphogenesis (GO:0048546)                                                                 | 50                                   | 6                                 | 1.35                                   | +                                        | 4.45                                          | 3.42E-03                                  | 4.92E-02                          |
| <b>positive regulation of locomotion (GO:0040017)</b>                                                      | 477                                  | 57                                | 12.88                                  | +                                        | 4.43                                          | 1.90E-19                                  | 5.36E-17                          |
| <b>female sex differentiation (GO:0046660)</b>                                                             | 109                                  | 13                                | 2.94                                   | +                                        | 4.42                                          | 2.00E-05                                  | 6.32E-04                          |
| renal tubule morphogenesis (GO:0061333)                                                                    | 67                                   | 8                                 | 1.81                                   | +                                        | 4.42                                          | 7.79E-04                                  | 1.54E-02                          |
| <b>connective tissue development (GO:0061448)</b>                                                          | 202                                  | 24                                | 5.45                                   | +                                        | 4.4                                           | 7.45E-09                                  | 5.11E-07                          |
| <b>response to cadmium ion (GO:0046686)</b>                                                                | 59                                   | 7                                 | 1.59                                   | +                                        | 4.4                                           | 1.70E-03                                  | 2.86E-02                          |
| <b>regeneration (GO:0031099)</b>                                                                           | 152                                  | 18                                | 4.1                                    | +                                        | 4.39                                          | 5.86E-07                                  | 2.78E-05                          |
| <b>skin epidermis development (GO:0098773)</b>                                                             | 76                                   | 9                                 | 2.05                                   | +                                        | 4.39                                          | 3.92E-04                                  | 8.53E-03                          |
| <b>kidney development (GO:0001822)</b>                                                                     | 254                                  | 30                                | 6.86                                   | +                                        | 4.38                                          | 1.12E-10                                  | 1.03E-08                          |
| <b>respiratory system development (GO:0060541)</b>                                                         | 195                                  | 23                                | 5.26                                   | +                                        | 4.37                                          | 1.73E-08                                  | 1.10E-06                          |
| heart contraction (GO:0060047)                                                                             | 85                                   | 10                                | 2.29                                   | +                                        | 4.36                                          | 1.98E-04                                  | 4.73E-03                          |
| <b>ureteric bud development (GO:0001657)</b>                                                               | 85                                   | 10                                | 2.29                                   | +                                        | 4.36                                          | 1.98E-04                                  | 4.72E-03                          |
| <b>urogenital system development (GO:0001655)</b>                                                          | 306                                  | 36                                | 8.26                                   | +                                        | 4.36                                          | 1.64E-12                                  | 1.84E-10                          |
| <b>regulation of angiogenesis (GO:0045765)</b>                                                             | 247                                  | 29                                | 6.67                                   | +                                        | 4.35                                          | 2.60E-10                                  | 2.31E-08                          |
| <b>platelet degranulation (GO:002576)</b>                                                                  | 128                                  | 15                                | 3.46                                   | +                                        | 4.34                                          | 5.68E-06                                  | 2.16E-04                          |
| cellular response to metal ion (GO:0071248)                                                                | 154                                  | 18                                | 4.16                                   | +                                        | 4.33                                          | 6.97E-07                                  | 3.23E-05                          |
| <b>hair cycle process (GO:0022405)</b>                                                                     | 77                                   | 9                                 | 2.08                                   | +                                        | 4.33                                          | 4.28E-04                                  | 9.23E-03                          |
| <b>molting cycle process (GO:0022404)</b>                                                                  | 77                                   | 9                                 | 2.08                                   | +                                        | 4.33                                          | 4.28E-04                                  | 9.22E-03                          |
| cellular response to calcium ion (GO:0071277)                                                              | 60                                   | 7                                 | 1.62                                   | +                                        | 4.32                                          | 1.86E-03                                  | 3.09E-02                          |
| <b>myofibril assembly (GO:0030239)</b>                                                                     | 60                                   | 7                                 | 1.62                                   | +                                        | 4.32                                          | 1.86E-03                                  | 3.08E-02                          |
| <b>mesonephric epithelium development (GO:0072163)</b>                                                     | 86                                   | 10                                | 2.32                                   | +                                        | 4.31                                          | 2.16E-04                                  | 5.09E-03                          |
| <b>mesonephric tubule development (GO:0072164)</b>                                                         | 86                                   | 10                                | 2.32                                   | +                                        | 4.31                                          | 2.16E-04                                  | 5.09E-03                          |
| <b>regulation of transmembrane receptor protein serine/threonine kinase signaling pathway (GO:0090092)</b> | 215                                  | 25                                | 5.8                                    | +                                        | 4.31                                          | 5.38E-09                                  | 3.83E-07                          |
| <b>response to calcium ion (GO:0051592)</b>                                                                | 121                                  | 14                                | 3.27                                   | +                                        | 4.29                                          | 1.32E-05                                  | 4.46E-04                          |
| <b>ovulation cycle process (GO:0022602)</b>                                                                | 78                                   | 9                                 | 2.11                                   | +                                        | 4.27                                          | 4.67E-04                                  | 9.95E-03                          |
| <b>positive regulation of chemotaxis (GO:0050921)</b>                                                      | 130                                  | 15                                | 3.51                                   | +                                        | 4.27                                          | 6.74E-06                                  | 2.48E-04                          |
| endothelium development (GO:0003158)                                                                       | 87                                   | 10                                | 2.35                                   | +                                        | 4.26                                          | 2.35E-04                                  | 5.47E-03                          |
| <b>regulation of actomyosin structure organization (GO:0110020)</b>                                        | 87                                   | 10                                | 2.35                                   | +                                        | 4.26                                          | 2.35E-04                                  | 5.48E-03                          |
| <b>cell-matrix adhesion (GO:0007160)</b>                                                                   | 122                                  | 14                                | 3.29                                   | +                                        | 4.25                                          | 1.44E-05                                  | 4.79E-04                          |

Continued

Supplementary Table SVII Continued

| GO biological process complete                                                                                              | Homo sapiens<br>- REFLIST<br>(21042) | Client Text<br>Box Input<br>(568) | Client Text<br>Box Input<br>(expected) | Client Text<br>Box Input<br>(over/under) | Client Text<br>Box Input (fold<br>Enrichment) | Client Text<br>Box Input (raw<br>P-value) | Client Text<br>Box Input<br>(FDR) |
|-----------------------------------------------------------------------------------------------------------------------------|--------------------------------------|-----------------------------------|----------------------------------------|------------------------------------------|-----------------------------------------------|-------------------------------------------|-----------------------------------|
| cellular response to corticosteroid stimulus<br>(GO:0071384)                                                                | 61                                   | 7                                 | 1.65                                   | +                                        | 4.25                                          | 2.03E-03                                  | 3.30E-02                          |
| maternal process involved in female pregnancy<br>(GO:0060135)                                                               | 61                                   | 7                                 | 1.65                                   | +                                        | 4.25                                          | 2.03E-03                                  | 3.30E-02                          |
| mesoderm development (GO:0007498)                                                                                           | 122                                  | 14                                | 3.29                                   | +                                        | 4.25                                          | 1.44E-05                                  | 4.80E-04                          |
| <b>nephron development (GO:0072006)</b>                                                                                     | 122                                  | 14                                | 3.29                                   | +                                        | 4.25                                          | 1.44E-05                                  | 4.78E-04                          |
| neuron projection extension (GO:1990138)                                                                                    | 61                                   | 7                                 | 1.65                                   | +                                        | 4.25                                          | 2.03E-03                                  | 3.30E-02                          |
| <b>regulation of cell migration (GO:0030334)</b>                                                                            | 733                                  | 84                                | 19.79                                  | +                                        | 4.25                                          | 2.74E-27                                  | 2.36E-24                          |
| regulation of interleukin-1 production (GO:0032652)                                                                         | 70                                   | 8                                 | 1.89                                   | +                                        | 4.23                                          | 1.01E-03                                  | 1.89E-02                          |
| <b>regulation of stress fiber assembly (GO:0051492)</b>                                                                     | 79                                   | 9                                 | 2.13                                   | +                                        | 4.22                                          | 5.08E-04                                  | 1.08E-02                          |
| renal system process (GO:0003014)                                                                                           | 106                                  | 12                                | 2.86                                   | +                                        | 4.19                                          | 6.57E-05                                  | 1.83E-03                          |
| glycosaminoglycan catabolic process (GO:0006027)                                                                            | 62                                   | 7                                 | 1.67                                   | +                                        | 4.18                                          | 2.20E-03                                  | 3.54E-02                          |
| <b>ossification (GO:0001503)</b>                                                                                            | 248                                  | 28                                | 6.69                                   | +                                        | 4.18                                          | 1.18E-09                                  | 9.57E-08                          |
| <b>somitogenesis (GO:0001756)</b>                                                                                           | 62                                   | 7                                 | 1.67                                   | +                                        | 4.18                                          | 2.20E-03                                  | 3.55E-02                          |
| <b>regulation of ERK1 and ERK2 cascade<br/>(GO:0070372)</b>                                                                 | 268                                  | 30                                | 7.23                                   | +                                        | 4.15                                          | 3.63E-10                                  | 3.18E-08                          |
| <b>actomyosin structure organization (GO:0031032)</b>                                                                       | 99                                   | 11                                | 2.67                                   | +                                        | 4.12                                          | 1.53E-04                                  | 3.80E-03                          |
| kidney morphogenesis (GO:0060993)                                                                                           | 81                                   | 9                                 | 2.19                                   | +                                        | 4.12                                          | 6.00E-04                                  | 1.23E-02                          |
| <b>mesonephros development (GO:0001823)</b>                                                                                 | 90                                   | 10                                | 2.43                                   | +                                        | 4.12                                          | 3.02E-04                                  | 6.83E-03                          |
| <b>negative regulation of transmembrane receptor<br/>protein serine/threonine kinase signaling pathway<br/>(GO:0090101)</b> | 108                                  | 12                                | 2.92                                   | +                                        | 4.12                                          | 7.75E-05                                  | 2.09E-03                          |
| <b>positive regulation of epithelial cell proliferation<br/>(GO:0050679)</b>                                                | 171                                  | 19                                | 4.62                                   | +                                        | 4.12                                          | 6.93E-07                                  | 3.23E-05                          |
| regulation of systemic arterial blood pressure<br>(GO:0003073)                                                              | 90                                   | 10                                | 2.43                                   | +                                        | 4.12                                          | 3.02E-04                                  | 6.84E-03                          |
| <b>striated muscle cell differentiation (GO:0051146)</b>                                                                    | 189                                  | 21                                | 5.1                                    | +                                        | 4.12                                          | 1.81E-07                                  | 9.51E-06                          |
| <b>response to growth factor (GO:0070848)</b>                                                                               | 497                                  | 55                                | 13.42                                  | +                                        | 4.1                                           | 1.91E-17                                  | 4.49E-15                          |
| negative regulation of MAP kinase activity (GO:0043407)                                                                     | 73                                   | 8                                 | 1.97                                   | +                                        | 4.06                                          | 1.30E-03                                  | 2.31E-02                          |
| regulation of chemokine production (GO:0032642)                                                                             | 73                                   | 8                                 | 1.97                                   | +                                        | 4.06                                          | 1.30E-03                                  | 2.32E-02                          |
| <b>cell growth (GO:0016049)</b>                                                                                             | 119                                  | 13                                | 3.21                                   | +                                        | 4.05                                          | 4.62E-05                                  | 1.34E-03                          |
| <b>cellular response to ionizing radiation<br/>(GO:0071479)</b>                                                             | 64                                   | 7                                 | 1.73                                   | +                                        | 4.05                                          | 2.60E-03                                  | 4.00E-02                          |
| <b>plasma membrane organization (GO:0007009)</b>                                                                            | 64                                   | 7                                 | 1.73                                   | +                                        | 4.05                                          | 2.60E-03                                  | 4.00E-02                          |
| <b>Rho protein signal transduction (GO:0007266)</b>                                                                         | 64                                   | 7                                 | 1.73                                   | +                                        | 4.05                                          | 2.60E-03                                  | 4.00E-02                          |

Continued

Supplementary Table SVII Continued

| GO biological process complete                                                           | Homo sapiens<br>- REFLIST<br>(21042) | Client Text<br>Box Input<br>(568) | Client Text<br>Box Input<br>(expected) | Client Text<br>Box Input<br>(over/under) | Client Text<br>Box Input (fold<br>Enrichment) | Client Text<br>Box Input (raw<br>P-value) | Client Text<br>Box Input<br>(FDR) |
|------------------------------------------------------------------------------------------|--------------------------------------|-----------------------------------|----------------------------------------|------------------------------------------|-----------------------------------------------|-------------------------------------------|-----------------------------------|
| transmembrane receptor protein serine/threonine kinase signaling pathway (GO:0007178)    | 192                                  | 21                                | 5.18                                   | +                                        | 4.05                                          | 2.30E-07                                  | 1.17E-05                          |
| regulation of osteoblast differentiation (GO:0045667)                                    | 110                                  | 12                                | 2.97                                   | +                                        | 4.04                                          | 9.10E-05                                  | 2.42E-03                          |
| cell-substrate adhesion (GO:0031589)                                                     | 166                                  | 18                                | 4.48                                   | +                                        | 4.02                                          | 1.87E-06                                  | 7.99E-05                          |
| regulation of cell motility (GO:2000145)                                                 | 784                                  | 85                                | 21.16                                  | +                                        | 4.02                                          | 4.21E-26                                  | 2.97E-23                          |
| homophilic cell adhesion via plasma membrane adhesion molecules (GO:0007156)             | 157                                  | 17                                | 4.24                                   | +                                        | 4.01                                          | 3.65E-06                                  | 1.46E-04                          |
| regulation of Notch signaling pathway (GO:0008593)                                       | 74                                   | 8                                 | 2                                      | +                                        | 4                                             | 1.40E-03                                  | 2.45E-02                          |
| positive regulation of DNA biosynthetic process (GO:2000573)                             | 65                                   | 7                                 | 1.75                                   | +                                        | 3.99                                          | 2.81E-03                                  | 4.26E-02                          |
| regulation of embryonic development (GO:0045995)                                         | 121                                  | 13                                | 3.27                                   | +                                        | 3.98                                          | 5.41E-05                                  | 1.54E-03                          |
| negative regulation of cellular component movement (GO:0051271)                          | 261                                  | 28                                | 7.05                                   | +                                        | 3.97                                          | 3.34E-09                                  | 2.44E-07                          |
| positive regulation of binding (GO:0051099)                                              | 168                                  | 18                                | 4.53                                   | +                                        | 3.97                                          | 2.18E-06                                  | 9.16E-05                          |
| positive regulation of protein import into nucleus (GO:0042307)                          | 103                                  | 11                                | 2.78                                   | +                                        | 3.96                                          | 2.10E-04                                  | 4.97E-03                          |
| regulation of cellular response to transforming growth factor beta stimulus (GO:1903844) | 103                                  | 11                                | 2.78                                   | +                                        | 3.96                                          | 2.10E-04                                  | 4.98E-03                          |
| cellular response to inorganic substance (GO:0071241)                                    | 178                                  | 19                                | 4.8                                    | +                                        | 3.95                                          | 1.20E-06                                  | 5.33E-05                          |
| placenta development (GO:0001890)                                                        | 150                                  | 16                                | 4.05                                   | +                                        | 3.95                                          | 8.35E-06                                  | 3.05E-04                          |
| cellular response to growth factor stimulus (GO:0071363)                                 | 470                                  | 50                                | 12.69                                  | +                                        | 3.94                                          | 2.50E-15                                  | 4.46E-13                          |
| morphogenesis of a branching epithelium (GO:0061138)                                     | 160                                  | 17                                | 4.32                                   | +                                        | 3.94                                          | 4.61E-06                                  | 1.79E-04                          |
| anatomical structure formation involved in morphogenesis (GO:0048646)                    | 840                                  | 89                                | 22.67                                  | +                                        | 3.93                                          | 1.10E-26                                  | 8.15E-24                          |
| muscle contraction (GO:0006936)                                                          | 245                                  | 26                                | 6.61                                   | +                                        | 3.93                                          | 1.49E-08                                  | 9.72E-07                          |
| nephron morphogenesis (GO:0072028)                                                       | 66                                   | 7                                 | 1.78                                   | +                                        | 3.93                                          | 3.04E-03                                  | 4.55E-02                          |
| positive regulation of phosphatidylinositol 3-kinase signaling (GO:0014068)              | 66                                   | 7                                 | 1.78                                   | +                                        | 3.93                                          | 3.04E-03                                  | 4.55E-02                          |
| regulation of cellular component movement (GO:0051270)                                   | 858                                  | 91                                | 23.16                                  | +                                        | 3.93                                          | 2.56E-27                                  | 2.34E-24                          |
| regulation of cytokine production involved in immune response (GO:0002718)               | 66                                   | 7                                 | 1.78                                   | +                                        | 3.93                                          | 3.04E-03                                  | 4.54E-02                          |

Continued

**Supplementary Table SV11 Continued**

| <b>GO biological process complete</b>                                         | <b>Homo sapiens - REFLIST (21042)</b> | <b>Client Text Box Input (568)</b> | <b>Client Text Box Input (expected)</b> | <b>Client Text Box Input (over/under)</b> | <b>Client Text Box Input (fold Enrichment)</b> | <b>Client Text Box Input (raw P-value)</b> | <b>Client Text Box Input (FDR)</b> |
|-------------------------------------------------------------------------------|---------------------------------------|------------------------------------|-----------------------------------------|-------------------------------------------|------------------------------------------------|--------------------------------------------|------------------------------------|
| regulation of protein acetylation (GO:1901983)                                | 66                                    | 7                                  | 1.78                                    | +                                         | 3.93                                           | 3.04E-03                                   | 4.55E-02                           |
| dorsal/ventral pattern formation (GO:0009953)                                 | 85                                    | 9                                  | 2.29                                    | +                                         | 3.92                                           | 8.23E-04                                   | 1.61E-02                           |
| reactive oxygen species metabolic process (GO:0072593)                        | 104                                   | 11                                 | 2.81                                    | +                                         | 3.92                                           | 2.27E-04                                   | 5.29E-03                           |
| <b>developmental growth involved in morphogenesis (GO:0060560)</b>            | 114                                   | 12                                 | 3.08                                    | +                                         | 3.9                                            | 1.24E-04                                   | 3.20E-03                           |
| negative regulation of endopeptidase activity (GO:0010951)                    | 247                                   | 26                                 | 6.67                                    | +                                         | 3.9                                            | 1.74E-08                                   | 1.10E-06                           |
| regulation of epithelial cell differentiation (GO:0030856)                    | 133                                   | 14                                 | 3.59                                    | +                                         | 3.9                                            | 3.47E-05                                   | 1.02E-03                           |
| regulation of striated muscle cell differentiation (GO:0051153)               | 95                                    | 10                                 | 2.56                                    | +                                         | 3.9                                            | 4.48E-04                                   | 9.62E-03                           |
| <b>cell junction organization (GO:0034330)</b>                                | 200                                   | 21                                 | 5.4                                     | +                                         | 3.89                                           | 4.26E-07                                   | 2.08E-05                           |
| <b>morphogenesis of an epithelium (GO:002009)</b>                             | 419                                   | 44                                 | 11.31                                   | +                                         | 3.89                                           | 1.92E-13                                   | 2.48E-11                           |
| <b>developmental cell growth (GO:0048588)</b>                                 | 86                                    | 9                                  | 2.32                                    | +                                         | 3.88                                           | 8.89E-04                                   | 1.70E-02                           |
| <b>negative regulation of locomotion (GO:0040013)</b>                         | 277                                   | 29                                 | 7.48                                    | +                                         | 3.88                                           | 2.90E-09                                   | 2.16E-07                           |
| negative regulation of peptidase activity (GO:0010466)                        | 258                                   | 27                                 | 6.96                                    | +                                         | 3.88                                           | 1.03E-08                                   | 6.81E-07                           |
| positive regulation of protein import (GO:1904591)                            | 105                                   | 11                                 | 2.83                                    | +                                         | 3.88                                           | 2.45E-04                                   | 5.65E-03                           |
| aminoglycan catabolic process (GO:0006026)                                    | 67                                    | 7                                  | 1.81                                    | +                                         | 3.87                                           | 3.29E-03                                   | 4.83E-02                           |
| <b>cartilage development (GO:0051216)</b>                                     | 153                                   | 16                                 | 4.13                                    | +                                         | 3.87                                           | 1.05E-05                                   | 3.68E-04                           |
| epithelial to mesenchymal transition (GO:0001837)                             | 67                                    | 7                                  | 1.81                                    | +                                         | 3.87                                           | 3.29E-03                                   | 4.83E-02                           |
| <b>negative regulation of cell migration (GO:0030336)</b>                     | 230                                   | 24                                 | 6.21                                    | +                                         | 3.87                                           | 7.15E-08                                   | 3.99E-06                           |
| regulation of blood vessel endothelial cell migration (GO:0043535)            | 67                                    | 7                                  | 1.81                                    | +                                         | 3.87                                           | 3.29E-03                                   | 4.83E-02                           |
| <b>regulation of epithelial cell proliferation (GO:0050678)</b>               | 306                                   | 32                                 | 8.26                                    | +                                         | 3.87                                           | 4.48E-10                                   | 3.82E-08                           |
| diterpenoid metabolic process (GO:0016101)                                    | 96                                    | 10                                 | 2.59                                    | +                                         | 3.86                                           | 4.83E-04                                   | 1.03E-02                           |
| positive regulation of axonogenesis (GO:0050772)                              | 77                                    | 8                                  | 2.08                                    | +                                         | 3.85                                           | 1.77E-03                                   | 2.97E-02                           |
| regulation of receptor-mediated endocytosis (GO:0048259)                      | 77                                    | 8                                  | 2.08                                    | +                                         | 3.85                                           | 1.77E-03                                   | 2.96E-02                           |
| <b>striated muscle cell development (GO:0055002)</b>                          | 125                                   | 13                                 | 3.37                                    | +                                         | 3.85                                           | 7.34E-05                                   | 2.01E-03                           |
| <b>cell-cell adhesion via plasma-membrane adhesion molecules (GO:0098742)</b> | 223                                   | 23                                 | 6.02                                    | +                                         | 3.82                                           | 1.62E-07                                   | 8.55E-06                           |
| <b>muscle organ development (GO:0007517)</b>                                  | 292                                   | 30                                 | 7.88                                    | +                                         | 3.81                                           | 2.31E-09                                   | 1.78E-07                           |
| <b>positive regulation of protein kinase B signaling (GO:0051897)</b>         | 146                                   | 15                                 | 3.94                                    | +                                         | 3.81                                           | 2.38E-05                                   | 7.35E-04                           |

Continued

Supplementary Table SVII Continued

| GO biological process complete                                           | Homo sapiens<br>- REFLIST<br>(21042) | Client Text<br>Box Input<br>(568) | Client Text<br>Box Input<br>(expected) | Client Text<br>Box Input<br>(over/under) | Client Text<br>Box Input (fold<br>Enrichment) | Client Text<br>Box Input (raw<br>P-value) | Client Text<br>Box Input<br>(FDR) |
|--------------------------------------------------------------------------|--------------------------------------|-----------------------------------|----------------------------------------|------------------------------------------|-----------------------------------------------|-------------------------------------------|-----------------------------------|
| <b>regulation of locomotion (GO:0040012)</b>                             | 855                                  | 88                                | 23.08                                  | +                                        | 3.81                                          | 1.42E-25                                  | 9.58E-23                          |
| negative regulation of MAPK cascade (GO:0043409)                         | 156                                  | 16                                | 4.21                                   | +                                        | 3.8                                           | 1.31E-05                                  | 4.43E-04                          |
| <b>response to ketone (GO:1901654)</b>                                   | 185                                  | 19                                | 4.99                                   | +                                        | 3.8                                           | 2.03E-06                                  | 8.59E-05                          |
| <b>somite development (GO:0061053)</b>                                   | 78                                   | 8                                 | 2.11                                   | +                                        | 3.8                                           | 1.91E-03                                  | 3.13E-02                          |
| <b>response to steroid hormone (GO:0048545)</b>                          | 332                                  | 34                                | 8.96                                   | +                                        | 3.79                                          | 2.10E-10                                  | 1.89E-08                          |
| <b>response to wounding (GO:0009611)</b>                                 | 557                                  | 57                                | 15.04                                  | +                                        | 3.79                                          | 1.21E-16                                  | 2.40E-14                          |
| <b>muscle system process (GO:0003012)</b>                                | 294                                  | 30                                | 7.94                                   | +                                        | 3.78                                          | 2.67E-09                                  | 2.03E-07                          |
| <b>negative regulation of cell motility (GO:2000146)</b>                 | 245                                  | 25                                | 6.61                                   | +                                        | 3.78                                          | 5.69E-08                                  | 3.22E-06                          |
| regulation of extrinsic apoptotic signaling pathway (GO:2001236)         | 157                                  | 16                                | 4.24                                   | +                                        | 3.78                                          | 1.41E-05                                  | 4.71E-04                          |
| regulation of organ morphogenesis (GO:2000027)                           | 255                                  | 26                                | 6.88                                   | +                                        | 3.78                                          | 3.14E-08                                  | 1.88E-06                          |
| <b>muscle structure development (GO:0061061)</b>                         | 463                                  | 47                                | 12.5                                   | +                                        | 3.76                                          | 8.69E-14                                  | 1.24E-11                          |
| axis specification (GO:0009798)                                          | 89                                   | 9                                 | 2.4                                    | +                                        | 3.75                                          | 1.11E-03                                  | 2.03E-02                          |
| <b>female gonad development (GO:0008585)</b>                             | 89                                   | 9                                 | 2.4                                    | +                                        | 3.75                                          | 1.11E-03                                  | 2.03E-02                          |
| <b>positive regulation of neuron death (GO:1901216)</b>                  | 79                                   | 8                                 | 2.13                                   | +                                        | 3.75                                          | 2.05E-03                                  | 3.34E-02                          |
| retinoid metabolic process (GO:0001523)                                  | 89                                   | 9                                 | 2.4                                    | +                                        | 3.75                                          | 1.11E-03                                  | 2.04E-02                          |
| mucopolysaccharide metabolic process (GO:1903510)                        | 109                                  | 11                                | 2.94                                   | +                                        | 3.74                                          | 3.29E-04                                  | 7.36E-03                          |
| <b>morphogenesis of a branching structure (GO:0001763)</b>               | 169                                  | 17                                | 4.56                                   | +                                        | 3.73                                          | 8.96E-06                                  | 3.25E-04                          |
| <b>wound healing (GO:0042060)</b>                                        | 467                                  | 47                                | 12.61                                  | +                                        | 3.73                                          | 1.16E-13                                  | 1.56E-11                          |
| <b>negative regulation of response to external stimulus (GO:0032102)</b> | 269                                  | 27                                | 7.26                                   | +                                        | 3.72                                          | 2.30E-08                                  | 1.42E-06                          |
| <b>cell-cell junction organization (GO:0045216)</b>                      | 170                                  | 17                                | 4.59                                   | +                                        | 3.7                                           | 9.62E-06                                  | 3.44E-04                          |
| <b>muscle cell development (GO:0055001)</b>                              | 140                                  | 14                                | 3.78                                   | +                                        | 3.7                                           | 5.79E-05                                  | 1.64E-03                          |
| positive regulation of cell cycle arrest (GO:0071158)                    | 90                                   | 9                                 | 2.43                                   | +                                        | 3.7                                           | 1.19E-03                                  | 2.16E-02                          |
| <b>regulation of actin filament bundle assembly (GO:0032231)</b>         | 90                                   | 9                                 | 2.43                                   | +                                        | 3.7                                           | 1.19E-03                                  | 2.16E-02                          |
| regulation of epithelial to mesenchymal transition (GO:0010717)          | 80                                   | 8                                 | 2.16                                   | +                                        | 3.7                                           | 2.21E-03                                  | 3.55E-02                          |
| renal tubule development (GO:0061326)                                    | 80                                   | 8                                 | 2.16                                   | +                                        | 3.7                                           | 2.21E-03                                  | 3.54E-02                          |
| <b>response to amino acid (GO:0043200)</b>                               | 110                                  | 11                                | 2.97                                   | +                                        | 3.7                                           | 3.53E-04                                  | 7.83E-03                          |
| skeletal muscle tissue development (GO:0007519)                          | 130                                  | 13                                | 3.51                                   | +                                        | 3.7                                           | 1.06E-04                                  | 2.77E-03                          |
| regulation of leukocyte migration (GO:0002685)                           | 171                                  | 17                                | 4.62                                   | +                                        | 3.68                                          | 1.03E-05                                  | 3.64E-04                          |
| <b>reproductive structure development (GO:0048608)</b>                   | 423                                  | 42                                | 11.42                                  | +                                        | 3.68                                          | 3.70E-12                                  | 3.93E-10                          |

Continued

Supplementary Table SVII Continued

| GO biological process complete                                                        | Homo sapiens - REFLIST (21042) | Client Text Box Input (568) | Client Text Box Input (expected) | Client Text Box Input (over/under) | Client Text Box Input (fold Enrichment) | Client Text Box Input (raw P-value) | Client Text Box Input (FDR) |
|---------------------------------------------------------------------------------------|--------------------------------|-----------------------------|----------------------------------|------------------------------------|-----------------------------------------|-------------------------------------|-----------------------------|
| <b>tube development (GO:0035295)</b>                                                  | 563                            | 56                          | 15.2                             | +                                  | 3.68                                    | 7.07E-16                            | 1.34E-13                    |
| glycosaminoglycan biosynthetic process (GO:0006024)                                   | 101                            | 10                          | 2.73                             | +                                  | 3.67                                    | 6.96E-04                            | 1.40E-02                    |
| <b>osteoblast differentiation (GO:0001649)</b>                                        | 121                            | 12                          | 3.27                             | +                                  | 3.67                                    | 2.07E-04                            | 4.93E-03                    |
| <b>regulation of cell-matrix adhesion (GO:0001952)</b>                                | 101                            | 10                          | 2.73                             | +                                  | 3.67                                    | 6.96E-04                            | 1.40E-02                    |
| regulation of transforming growth factor beta receptor signaling pathway (GO:0017015) | 101                            | 10                          | 2.73                             | +                                  | 3.67                                    | 6.96E-04                            | 1.40E-02                    |
| <b>hair cycle (GO:0042633)</b>                                                        | 91                             | 9                           | 2.46                             | +                                  | 3.66                                    | 1.28E-03                            | 2.30E-02                    |
| <b>molting cycle (GO:0042303)</b>                                                     | 91                             | 9                           | 2.46                             | +                                  | 3.66                                    | 1.28E-03                            | 2.30E-02                    |
| regulation of heart rate (GO:0002027)                                                 | 91                             | 9                           | 2.46                             | +                                  | 3.66                                    | 1.28E-03                            | 2.30E-02                    |
| platelet activation (GO:0030168)                                                      | 142                            | 14                          | 3.83                             | +                                  | 3.65                                    | 6.67E-05                            | 1.85E-03                    |
| positive regulation of nucleocytoplasmic transport (GO:0046824)                       | 122                            | 12                          | 3.29                             | +                                  | 3.64                                    | 2.22E-04                            | 5.21E-03                    |
| <b>regulation of reactive oxygen species metabolic process (GO:2000377)</b>           | 163                            | 16                          | 4.4                              | +                                  | 3.64                                    | 2.16E-05                            | 6.69E-04                    |
| <b>reproductive system development (GO:0061458)</b>                                   | 427                            | 42                          | 11.53                            | +                                  | 3.64                                    | 4.89E-12                            | 5.13E-10                    |
| aminoglycan biosynthetic process (GO:0006023)                                         | 102                            | 10                          | 2.75                             | +                                  | 3.63                                    | 7.47E-04                            | 1.48E-02                    |
| <b>muscle cell differentiation (GO:0042692)</b>                                       | 235                            | 23                          | 6.34                             | +                                  | 3.63                                    | 3.80E-07                            | 1.87E-05                    |
| branching morphogenesis of an epithelial tube (GO:0048754)                            | 133                            | 13                          | 3.59                             | +                                  | 3.62                                    | 1.30E-04                            | 3.33E-03                    |
| negative regulation of leukocyte differentiation (GO:1902106)                         | 92                             | 9                           | 2.48                             | +                                  | 3.62                                    | 1.38E-03                            | 2.41E-02                    |
| <b>cell adhesion (GO:0007155)</b>                                                     | 873                            | 85                          | 23.57                            | +                                  | 3.61                                    | 3.18E-23                            | 1.59E-20                    |
| <b>positive regulation of ERK1 and ERK2 cascade (GO:0070374)</b>                      | 195                            | 19                          | 5.26                             | +                                  | 3.61                                    | 4.13E-06                            | 1.62E-04                    |
| <b>biological adhesion (GO:0022610)</b>                                               | 878                            | 85                          | 23.7                             | +                                  | 3.59                                    | 4.50E-23                            | 2.05E-20                    |
| response to antineoplastic agent (GO:0097327)                                         | 93                             | 9                           | 2.51                             | +                                  | 3.59                                    | 1.47E-03                            | 2.55E-02                    |
| <b>cerebral cortex development (GO:0021987)</b>                                       | 114                            | 11                          | 3.08                             | +                                  | 3.57                                    | 4.67E-04                            | 9.95E-03                    |
| <b>male gonad development (GO:0008584)</b>                                            | 135                            | 13                          | 3.64                             | +                                  | 3.57                                    | 1.50E-04                            | 3.74E-03                    |
| positive regulation of muscle cell differentiation (GO:0051149)                       | 83                             | 8                           | 2.24                             | +                                  | 3.57                                    | 2.73E-03                            | 4.16E-02                    |
| proteoglycan metabolic process (GO:0006029)                                           | 83                             | 8                           | 2.24                             | +                                  | 3.57                                    | 2.73E-03                            | 4.17E-02                    |
| regulation of DNA biosynthetic process (GO:2000278)                                   | 104                            | 10                          | 2.81                             | +                                  | 3.56                                    | 8.57E-04                            | 1.66E-02                    |
| development of primary female sexual characteristics (GO:0046545)                     | 94                             | 9                           | 2.54                             | +                                  | 3.55                                    | 1.58E-03                            | 2.70E-02                    |
| <b>embryonic morphogenesis (GO:0048598)</b>                                           | 563                            | 54                          | 15.2                             | +                                  | 3.55                                    | 9.64E-15                            | 1.57E-12                    |

Continued

Supplementary Table SV11 Continued

| GO biological process complete                                                       | Homo sapiens<br>- REFLIST<br>(21042) | Client Text<br>Box Input<br>(568) | Client Text<br>Box Input<br>(expected) | Client Text<br>Box Input<br>(over/under) | Client Text<br>Box Input (fold<br>Enrichment) | Client Text<br>Box Input (raw<br>P-value) | Client Text<br>Box Input<br>(FDR) |
|--------------------------------------------------------------------------------------|--------------------------------------|-----------------------------------|----------------------------------------|------------------------------------------|-----------------------------------------------|-------------------------------------------|-----------------------------------|
| <b>cellular response to acid chemical (GO:0071229)</b>                               | 199                                  | 19                                | 5.37                                   | +                                        | 3.54                                          | 5.41E-06                                  | 2.06E-04                          |
| <b>development of primary male sexual characteristics (GO:0046546)</b>               | 136                                  | 13                                | 3.67                                   | +                                        | 3.54                                          | 1.60E-04                                  | 3.94E-03                          |
| positive regulation of protein localization to nucleus (GO:1900182)                  | 136                                  | 13                                | 3.67                                   | +                                        | 3.54                                          | 1.60E-04                                  | 3.95E-03                          |
| regulation of lipase activity (GO:0060191)                                           | 84                                   | 8                                 | 2.27                                   | +                                        | 3.53                                          | 2.92E-03                                  | 4.40E-02                          |
| <b>tissue development (GO:0009888)</b>                                               | 1658                                 | 158                               | 44.76                                  | +                                        | 3.53                                          | 2.05E-43                                  | 1.59E-39                          |
| regulation of myeloid leukocyte differentiation (GO:0002761)                         | 116                                  | 11                                | 3.13                                   | +                                        | 3.51                                          | 5.35E-04                                  | 1.12E-02                          |
| positive regulation of myeloid cell differentiation (GO:0045639)                     | 85                                   | 8                                 | 2.29                                   | +                                        | 3.49                                          | 3.12E-03                                  | 4.65E-02                          |
| skeletal muscle organ development (GO:0060538)                                       | 138                                  | 13                                | 3.73                                   | +                                        | 3.49                                          | 1.83E-04                                  | 4.43E-03                          |
| terpenoid metabolic process (GO:0006721)                                             | 106                                  | 10                                | 2.86                                   | +                                        | 3.49                                          | 9.81E-04                                  | 1.84E-02                          |
| <b>cell migration (GO:0016477)</b>                                                   | 872                                  | 82                                | 23.54                                  | +                                        | 3.48                                          | 1.58E-21                                  | 5.31E-19                          |
| <b>cellular response to external stimulus (GO:0071496)</b>                           | 298                                  | 28                                | 8.04                                   | +                                        | 3.48                                          | 4.61E-08                                  | 2.66E-06                          |
| <b>response to metal ion (GO:0010038)</b>                                            | 330                                  | 31                                | 8.91                                   | +                                        | 3.48                                          | 8.77E-09                                  | 5.89E-07                          |
| <b>response to inorganic substance (GO:0010035)</b>                                  | 480                                  | 45                                | 12.96                                  | +                                        | 3.47                                          | 3.72E-12                                  | 3.93E-10                          |
| cellular response to BMP stimulus (GO:0071773)                                       | 107                                  | 10                                | 2.89                                   | +                                        | 3.46                                          | 1.05E-03                                  | 1.95E-02                          |
| regulation of leukocyte chemotaxis (GO:0002688)                                      | 107                                  | 10                                | 2.89                                   | +                                        | 3.46                                          | 1.05E-03                                  | 1.94E-02                          |
| <b>regulation of ossification (GO:0030278)</b>                                       | 182                                  | 17                                | 4.91                                   | +                                        | 3.46                                          | 2.17E-05                                  | 6.72E-04                          |
| response to BMP (GO:0071772)                                                         | 107                                  | 10                                | 2.89                                   | +                                        | 3.46                                          | 1.05E-03                                  | 1.94E-02                          |
| <b>telencephalon development (GO:0021537)</b>                                        | 246                                  | 23                                | 6.64                                   | +                                        | 3.46                                          | 7.93E-07                                  | 3.65E-05                          |
| <b>animal organ morphogenesis (GO:0009887)</b>                                       | 881                                  | 82                                | 23.78                                  | +                                        | 3.45                                          | 2.85E-21                                  | 9.41E-19                          |
| <b>negative regulation of cell growth (GO:0030308)</b>                               | 161                                  | 15                                | 4.35                                   | +                                        | 3.45                                          | 6.71E-05                                  | 1.86E-03                          |
| regulation of cyclin-dependent protein serine/threonine kinase activity (GO:0000079) | 86                                   | 8                                 | 2.32                                   | +                                        | 3.45                                          | 3.34E-03                                  | 4.82E-02                          |
| <b>regulation of muscle system process (GO:0090257)</b>                              | 215                                  | 20                                | 5.8                                    | +                                        | 3.45                                          | 4.42E-06                                  | 1.72E-04                          |
| <b>response to estradiol (GO:0032355)</b>                                            | 129                                  | 12                                | 3.48                                   | +                                        | 3.45                                          | 3.56E-04                                  | 7.87E-03                          |
| <b>axon guidance (GO:0007411)</b>                                                    | 226                                  | 21                                | 6.1                                    | +                                        | 3.44                                          | 2.60E-06                                  | 1.07E-04                          |
| <b>cell-cell adhesion (GO:0098609)</b>                                               | 442                                  | 41                                | 11.93                                  | +                                        | 3.44                                          | 4.75E-11                                  | 4.49E-09                          |
| inner ear development (GO:0048839)                                                   | 184                                  | 17                                | 4.97                                   | +                                        | 3.42                                          | 2.47E-05                                  | 7.55E-04                          |
| <b>regulation of protein kinase B signaling (GO:0051896)</b>                         | 195                                  | 18                                | 5.26                                   | +                                        | 3.42                                          | 1.45E-05                                  | 4.81E-04                          |

Continued



Supplementary Table SVII Continued

| GO biological process complete                                    | Homo sapiens - REFLIST (21042) | Client Text Box Input (568) | Client Text Box Input (expected) | Client Text Box Input (over/under) | Client Text Box Input (fold Enrichment) | Client Text Box Input (raw P-value) | Client Text Box Input (FDR) |
|-------------------------------------------------------------------|--------------------------------|-----------------------------|----------------------------------|------------------------------------|-----------------------------------------|-------------------------------------|-----------------------------|
| neuron projection guidance (GO:0097485)                           | 228                            | 21                          | 6.15                             | +                                  | 3.41                                    | 2.96E-06                            | 1.21E-04                    |
| leukocyte migration (GO:0050900)                                  | 360                            | 33                          | 9.72                             | +                                  | 3.4                                     | 5.05E-09                            | 3.64E-07                    |
| response to oxygen levels (GO:0070482)                            | 371                            | 34                          | 10.01                            | +                                  | 3.4                                     | 2.96E-09                            | 2.19E-07                    |
| skeletal system development (GO:0001501)                          | 469                            | 43                          | 12.66                            | +                                  | 3.4                                     | 2.22E-11                            | 2.18E-09                    |
| glycosaminoglycan metabolic process (GO:0030203)                  | 153                            | 14                          | 4.13                             | +                                  | 3.39                                    | 1.39E-04                            | 3.49E-03                    |
| regulation of muscle cell differentiation (GO:0051147)            | 142                            | 13                          | 3.83                             | +                                  | 3.39                                    | 2.37E-04                            | 5.50E-03                    |
| positive regulation of cell adhesion (GO:0045785)                 | 395                            | 36                          | 10.66                            | +                                  | 3.38                                    | 1.15E-09                            | 9.41E-08                    |
| regulation of peptidyl-tyrosine phosphorylation (GO:0050730)      | 230                            | 21                          | 6.21                             | +                                  | 3.38                                    | 3.36E-06                            | 1.35E-04                    |
| odontogenesis (GO:0042476)                                        | 110                            | 10                          | 2.97                             | +                                  | 3.37                                    | 1.27E-03                            | 2.29E-02                    |
| positive regulation of leukocyte migration (GO:0002687)           | 121                            | 11                          | 3.27                             | +                                  | 3.37                                    | 7.40E-04                            | 1.47E-02                    |
| regulation of blood pressure (GO:0008217)                         | 176                            | 16                          | 4.75                             | +                                  | 3.37                                    | 5.08E-05                            | 1.46E-03                    |
| positive regulation of JNK cascade (GO:0046330)                   | 122                            | 11                          | 3.29                             | +                                  | 3.34                                    | 7.88E-04                            | 1.55E-02                    |
| positive regulation of leukocyte differentiation (GO:1902107)     | 133                            | 12                          | 3.59                             | +                                  | 3.34                                    | 4.59E-04                            | 9.83E-03                    |
| response to monosaccharide (GO:0034284)                           | 144                            | 13                          | 3.89                             | +                                  | 3.34                                    | 2.69E-04                            | 6.17E-03                    |
| response to organophosphorus (GO:0046683)                         | 133                            | 12                          | 3.59                             | +                                  | 3.34                                    | 4.59E-04                            | 9.81E-03                    |
| regulation of lipid transport (GO:0032368)                        | 100                            | 9                           | 2.7                              | +                                  | 3.33                                    | 2.34E-03                            | 3.74E-02                    |
| eye morphogenesis (GO:0048592)                                    | 145                            | 13                          | 3.91                             | +                                  | 3.32                                    | 2.86E-04                            | 6.51E-03                    |
| regulation of muscle contraction (GO:0006937)                     | 156                            | 14                          | 4.21                             | +                                  | 3.32                                    | 1.67E-04                            | 4.09E-03                    |
| negative regulation of epithelial cell proliferation (GO:0050680) | 123                            | 11                          | 3.32                             | +                                  | 3.31                                    | 8.38E-04                            | 1.64E-02                    |
| positive regulation of endocytosis (GO:0045807)                   | 123                            | 11                          | 3.32                             | +                                  | 3.31                                    | 8.38E-04                            | 1.63E-02                    |
| response to decreased oxygen levels (GO:0036293)                  | 347                            | 31                          | 9.37                             | +                                  | 3.31                                    | 2.56E-08                            | 1.57E-06                    |
| striated muscle contraction (GO:0006941)                          | 112                            | 10                          | 3.02                             | +                                  | 3.31                                    | 1.44E-03                            | 2.49E-02                    |
| negative regulation of growth (GO:0045926)                        | 236                            | 21                          | 6.37                             | +                                  | 3.3                                     | 4.86E-06                            | 1.87E-04                    |
| pallium development (GO:0021543)                                  | 169                            | 15                          | 4.56                             | +                                  | 3.29                                    | 1.11E-04                            | 2.88E-03                    |
| cellular response to oxidative stress (GO:0034599)                | 226                            | 20                          | 6.1                              | +                                  | 3.28                                    | 8.78E-06                            | 3.19E-04                    |
| male sex differentiation (GO:0046661)                             | 158                            | 14                          | 4.26                             | +                                  | 3.28                                    | 1.89E-04                            | 4.56E-03                    |
| positive regulation of MAP kinase activity (GO:0043406)           | 260                            | 23                          | 7.02                             | +                                  | 3.28                                    | 1.90E-06                            | 8.10E-05                    |
| response to hypoxia (GO:0001666)                                  | 339                            | 30                          | 9.15                             | +                                  | 3.28                                    | 5.23E-08                            | 3.00E-06                    |

Continued

**Supplementary Table SVII Continued**

| GO biological process complete                                                      | Homo sapiens<br>- REFLIST<br>(21042) | Client Text<br>Box Input<br>(568) | Client Text<br>Box Input<br>(expected) | Client Text<br>Box Input<br>(over/under) | Client Text<br>Box Input (fold<br>Enrichment) | Client Text<br>Box Input (raw<br>P-value) | Client Text<br>Box Input<br>(FDR) |
|-------------------------------------------------------------------------------------|--------------------------------------|-----------------------------------|----------------------------------------|------------------------------------------|-----------------------------------------------|-------------------------------------------|-----------------------------------|
| regulation of morphogenesis of an epithelium (GO:1905330)                           | 182                                  | 16                                | 4.91                                   | +                                        | 3.26                                          | 7.34E-05                                  | 2.00E-03                          |
| <b>regulation of peptidase activity (GO:0052547)</b>                                | 421                                  | 37                                | 11.36                                  | +                                        | 3.26                                          | 1.69E-09                                  | 1.33E-07                          |
| <b>positive regulation of MAPK cascade (GO:0043410)</b>                             | 502                                  | 44                                | 13.55                                  | +                                        | 3.25                                          | 5.00E-11                                  | 4.70E-09                          |
| positive regulation of peptidase activity (GO:0010952)                              | 171                                  | 15                                | 4.62                                   | +                                        | 3.25                                          | 1.25E-04                                  | 3.22E-03                          |
| <b>positive regulation of peptidyl-tyrosine phosphorylation (GO:0050731)</b>        | 171                                  | 15                                | 4.62                                   | +                                        | 3.25                                          | 1.25E-04                                  | 3.22E-03                          |
| <b>supramolecular fiber organization (GO:0097435)</b>                               | 388                                  | 34                                | 10.47                                  | +                                        | 3.25                                          | 8.38E-09                                  | 5.67E-07                          |
| aminoglycan metabolic process (GO:0006022)                                          | 160                                  | 14                                | 4.32                                   | +                                        | 3.24                                          | 2.13E-04                                  | 5.04E-03                          |
| myeloid leukocyte migration (GO:0097529)                                            | 103                                  | 9                                 | 2.78                                   | +                                        | 3.24                                          | 2.81E-03                                  | 4.28E-02                          |
| response to purine-containing compound (GO:0014074)                                 | 149                                  | 13                                | 4.02                                   | +                                        | 3.23                                          | 3.64E-04                                  | 8.00E-03                          |
| <b>regulation of protein binding (GO:0043393)</b>                                   | 207                                  | 18                                | 5.59                                   | +                                        | 3.22                                          | 3.03E-05                                  | 9.06E-04                          |
| response to hexose (GO:0009746)                                                     | 138                                  | 12                                | 3.73                                   | +                                        | 3.22                                          | 6.23E-04                                  | 1.28E-02                          |
| <b>positive regulation of protein serine/threonine kinase activity (GO:0071902)</b> | 347                                  | 30                                | 9.37                                   | +                                        | 3.2                                           | 8.39E-08                                  | 4.62E-06                          |
| <b>ear development (GO:0043583)</b>                                                 | 209                                  | 18                                | 5.64                                   | +                                        | 3.19                                          | 3.41E-05                                  | 1.01E-03                          |
| <b>regulation of body fluid levels (GO:0050878)</b>                                 | 499                                  | 43                                | 13.47                                  | +                                        | 3.19                                          | 1.37E-10                                  | 1.24E-08                          |
| regulation of cell cycle arrest (GO:0071156)                                        | 116                                  | 10                                | 3.13                                   | +                                        | 3.19                                          | 1.84E-03                                  | 3.06E-02                          |
| anterior/posterior pattern specification (GO:0009952)                               | 198                                  | 17                                | 5.34                                   | +                                        | 3.18                                          | 5.80E-05                                  | 1.63E-03                          |
| <b>negative regulation of hemopoiesis (GO:1903707)</b>                              | 128                                  | 11                                | 3.46                                   | +                                        | 3.18                                          | 1.13E-03                                  | 2.07E-02                          |
| <b>negative regulation of hydrolase activity (GO:0051346)</b>                       | 420                                  | 36                                | 11.34                                  | +                                        | 3.18                                          | 5.18E-09                                  | 3.72E-07                          |
| negative regulation of protein serine/threonine kinase activity (GO:0071901)        | 128                                  | 11                                | 3.46                                   | +                                        | 3.18                                          | 1.13E-03                                  | 2.07E-02                          |
| <b>positive regulation of cell death (GO:0010942)</b>                               | 653                                  | 56                                | 17.63                                  | +                                        | 3.18                                          | 2.25E-13                                  | 2.84E-11                          |
| positive regulation of homeostatic process (GO:0032846)                             | 221                                  | 19                                | 5.97                                   | +                                        | 3.18                                          | 2.13E-05                                  | 6.64E-04                          |
| <b>regulation of anatomical structure morphogenesis (GO:0022603)</b>                | 980                                  | 84                                | 26.45                                  | +                                        | 3.18                                          | 1.07E-19                                  | 3.14E-17                          |
| <b>epithelium development (GO:0060429)</b>                                          | 1074                                 | 92                                | 28.99                                  | +                                        | 3.17                                          | 1.52E-21                                  | 5.23E-19                          |
| hormone metabolic process (GO:0042445)                                              | 187                                  | 16                                | 5.05                                   | +                                        | 3.17                                          | 9.86E-05                                  | 2.61E-03                          |
| <b>gonad development (GO:0008406)</b>                                               | 211                                  | 18                                | 5.7                                    | +                                        | 3.16                                          | 3.83E-05                                  | 1.12E-03                          |
| <b>negative regulation of protein phosphorylation (GO:0001933)</b>                  | 410                                  | 35                                | 11.07                                  | +                                        | 3.16                                          | 9.34E-09                                  | 6.22E-07                          |
| apoptotic signaling pathway (GO:0097190)                                            | 294                                  | 25                                | 7.94                                   | +                                        | 3.15                                          | 1.33E-06                                  | 5.86E-05                          |

Continued

Supplementary Table SVII Continued

| GO biological process complete                                           | Homo sapiens - REFLIST (21042) | Client Text Box Input (568) | Client Text Box Input (expected) | Client Text Box Input (over/under) | Client Text Box Input (fold Enrichment) | Client Text Box Input (raw P-value) | Client Text Box Input (FDR) |
|--------------------------------------------------------------------------|--------------------------------|-----------------------------|----------------------------------|------------------------------------|-----------------------------------------|-------------------------------------|-----------------------------|
| <b>positive regulation of cell proliferation (GO:0008284)</b>            | 871                            | 74                          | 23.51                            | +                                  | 3.15                                    | 3.32E-17                            | 7.45E-15                    |
| <b>regulation of cell adhesion (GO:0030155)</b>                          | 671                            | 57                          | 18.11                            | +                                  | 3.15                                    | 1.95E-13                            | 2.48E-11                    |
| response to retinoic acid (GO:0032526)                                   | 106                            | 9                           | 2.86                             | +                                  | 3.15                                    | 3.36E-03                            | 4.85E-02                    |
| <b>tube morphogenesis (GO:0035239)</b>                                   | 341                            | 29                          | 9.2                              | +                                  | 3.15                                    | 1.90E-07                            | 9.90E-06                    |
| <b>cell motility (GO:0048870)</b>                                        | 969                            | 82                          | 26.16                            | +                                  | 3.13                                    | 6.39E-19                            | 1.68E-16                    |
| <b>embryo development (GO:0009790)</b>                                   | 924                            | 78                          | 24.94                            | +                                  | 3.13                                    | 5.84E-18                            | 1.44E-15                    |
| <b>localization of cell (GO:0051674)</b>                                 | 969                            | 82                          | 26.16                            | +                                  | 3.13                                    | 6.39E-19                            | 1.71E-16                    |
| <b>axon development (GO:0061564)</b>                                     | 380                            | 32                          | 10.26                            | +                                  | 3.12                                    | 5.45E-08                            | 3.12E-06                    |
| positive regulation of hemopoiesis (GO:1903708)                          | 166                            | 14                          | 4.48                             | +                                  | 3.12                                    | 3.03E-04                            | 6.83E-03                    |
| <b>regulation of MAPK cascade (GO:0043408)</b>                           | 700                            | 59                          | 18.9                             | +                                  | 3.12                                    | 9.73E-14                            | 1.36E-11                    |
| <b>negative regulation of cell adhesion (GO:0007162)</b>                 | 238                            | 20                          | 6.42                             | +                                  | 3.11                                    | 1.77E-05                            | 5.74E-04                    |
| <b>regulation of JNK cascade (GO:0046328)</b>                            | 167                            | 14                          | 4.51                             | +                                  | 3.11                                    | 3.20E-04                            | 7.20E-03                    |
| <b>regulation of MAP kinase activity (GO:0043405)</b>                    | 333                            | 28                          | 8.99                             | +                                  | 3.11                                    | 3.83E-07                            | 1.87E-05                    |
| regulation of peptidyl-serine phosphorylation (GO:0033135)               | 131                            | 11                          | 3.54                             | +                                  | 3.11                                    | 1.35E-03                            | 2.37E-02                    |
| <b>taxis (GO:0042330)</b>                                                | 500                            | 42                          | 13.5                             | +                                  | 3.11                                    | 4.65E-10                            | 3.94E-08                    |
| cellular response to extracellular stimulus (GO:0031668)                 | 227                            | 19                          | 6.13                             | +                                  | 3.1                                     | 2.99E-05                            | 8.96E-04                    |
| regulation of cysteine-type endopeptidase activity (GO:2000116)          | 239                            | 20                          | 6.45                             | +                                  | 3.1                                     | 1.87E-05                            | 5.99E-04                    |
| regulation of endopeptidase activity (GO:0052548)                        | 394                            | 33                          | 10.64                            | +                                  | 3.1                                     | 3.80E-08                            | 2.23E-06                    |
| <b>negative regulation of neuron projection development (GO:0010977)</b> | 120                            | 10                          | 3.24                             | +                                  | 3.09                                    | 2.31E-03                            | 3.71E-02                    |
| <b>positive regulation of response to external stimulus (GO:0032103)</b> | 276                            | 23                          | 7.45                             | +                                  | 3.09                                    | 4.79E-06                            | 1.84E-04                    |
| positive regulation of stress-activated MAPK cascade (GO:0032874)        | 144                            | 12                          | 3.89                             | +                                  | 3.09                                    | 8.82E-04                            | 1.69E-02                    |
| <b>response to carbohydrate (GO:0009743)</b>                             | 168                            | 14                          | 4.53                             | +                                  | 3.09                                    | 3.39E-04                            | 7.56E-03                    |
| signal transduction by p53 class mediator (GO:0072331)                   | 132                            | 11                          | 3.56                             | +                                  | 3.09                                    | 1.43E-03                            | 2.47E-02                    |
| <b>anatomical structure morphogenesis (GO:0009653)</b>                   | 2021                           | 168                         | 54.55                            | +                                  | 3.08                                    | 3.02E-39                            | 9.38E-36                    |
| development of primary sexual characteristics (GO:0045137)               | 217                            | 18                          | 5.86                             | +                                  | 3.07                                    | 5.37E-05                            | 1.53E-03                    |
| <b>female pregnancy (GO:0007565)</b>                                     | 181                            | 15                          | 4.89                             | +                                  | 3.07                                    | 2.23E-04                            | 5.21E-03                    |
| <b>locomotion (GO:0040011)</b>                                           | 1205                           | 100                         | 32.53                            | +                                  | 3.07                                    | 1.71E-22                            | 6.99E-20                    |

Continued

Supplementary Table SVII Continued

| GO biological process complete                                                                   | Homo sapiens<br>- REFLIST<br>(21042) | Client Text<br>Box Input<br>(568) | Client Text<br>Box Input<br>(expected) | Client Text<br>Box Input<br>(over/under) | Client Text<br>Box Input (fold<br>Enrichment) | Client Text<br>Box Input (raw<br>P-value) | Client Text<br>Box Input<br>(FDR) |
|--------------------------------------------------------------------------------------------------|--------------------------------------|-----------------------------------|----------------------------------------|------------------------------------------|-----------------------------------------------|-------------------------------------------|-----------------------------------|
| <b>morphogenesis of embryonic epithelium<br/>(GO:0016331)</b>                                    | 145                                  | 12                                | 3.91                                   | +                                        | 3.07                                          | 9.33E-04                                  | 1.76E-02                          |
| negative regulation of cell activation (GO:0050866)                                              | 169                                  | 14                                | 4.56                                   | +                                        | 3.07                                          | 3.58E-04                                  | 7.90E-03                          |
| positive regulation of stress-activated protein kinase<br>signaling cascade (GO:0070304)         | 145                                  | 12                                | 3.91                                   | +                                        | 3.07                                          | 9.33E-04                                  | 1.77E-02                          |
| <b>negative regulation of phosphorylation<br/>(GO:0042326)</b>                                   | 448                                  | 37                                | 12.09                                  | +                                        | 3.06                                          | 7.90E-09                                  | 5.38E-07                          |
| response to glucose (GO:0009749)                                                                 | 133                                  | 11                                | 3.59                                   | +                                        | 3.06                                          | 1.51E-03                                  | 2.59E-02                          |
| <b>positive regulation of programmed cell death<br/>(GO:0043068)</b>                             | 607                                  | 50                                | 16.39                                  | +                                        | 3.05                                          | 1.81E-11                                  | 1.79E-09                          |
| regulation of heart contraction (GO:0008016)                                                     | 231                                  | 19                                | 6.24                                   | +                                        | 3.05                                          | 3.74E-05                                  | 1.09E-03                          |
| <b>chemotaxis (GO:0006935)</b>                                                                   | 499                                  | 41                                | 13.47                                  | +                                        | 3.04                                          | 1.38E-09                                  | 1.09E-07                          |
| <b>embryonic organ development (GO:0048568)</b>                                                  | 426                                  | 35                                | 11.5                                   | +                                        | 3.04                                          | 2.28E-08                                  | 1.42E-06                          |
| negative regulation of cytokine production (GO:0001818)                                          | 244                                  | 20                                | 6.59                                   | +                                        | 3.04                                          | 2.46E-05                                  | 7.54E-04                          |
| <b>positive regulation of developmental process<br/>(GO:0051094)</b>                             | 1241                                 | 102                               | 33.5                                   | +                                        | 3.04                                          | 1.17E-22                                  | 4.90E-20                          |
| <b>regulation of G1/S transition of mitotic cell cycle<br/>(GO:2000045)</b>                      | 146                                  | 12                                | 3.94                                   | +                                        | 3.04                                          | 9.86E-04                                  | 1.84E-02                          |
| <b>camera-type eye development (GO:0043010)</b>                                                  | 293                                  | 24                                | 7.91                                   | +                                        | 3.03                                          | 3.93E-06                                  | 1.56E-04                          |
| <b>negative regulation of signal transduction<br/>(GO:0009968)</b>                               | 1176                                 | 96                                | 31.74                                  | +                                        | 3.02                                          | 4.08E-21                                  | 1.32E-18                          |
| <b>positive regulation of apoptotic process<br/>(GO:0043065)</b>                                 | 601                                  | 49                                | 16.22                                  | +                                        | 3.02                                          | 4.08E-11                                  | 3.90E-09                          |
| blood coagulation (GO:0007596)                                                                   | 295                                  | 24                                | 7.96                                   | +                                        | 3.01                                          | 4.38E-06                                  | 1.71E-04                          |
| <b>positive regulation of cell differentiation<br/>(GO:0045597)</b>                              | 862                                  | 70                                | 23.27                                  | +                                        | 3.01                                          | 2.19E-15                                  | 4.00E-13                          |
| regulation of cysteine-type endopeptidase activity<br>involved in apoptotic process (GO:0043281) | 209                                  | 17                                | 5.64                                   | +                                        | 3.01                                          | 1.07E-04                                  | 2.81E-03                          |
| <b>regulation of protein serine/threonine kinase<br/>activity (GO:0071900)</b>                   | 492                                  | 40                                | 13.28                                  | +                                        | 3.01                                          | 2.97E-09                                  | 2.16E-07                          |
| <b>aging (GO:0007568)</b>                                                                        | 259                                  | 21                                | 6.99                                   | +                                        | 3                                             | 1.80E-05                                  | 5.83E-04                          |
| cellular response to starvation (GO:0009267)                                                     | 136                                  | 11                                | 3.67                                   | +                                        | 3                                             | 1.78E-03                                  | 2.98E-02                          |
| regulation of leukocyte proliferation (GO:0070663)                                               | 210                                  | 17                                | 5.67                                   | +                                        | 3                                             | 1.13E-04                                  | 2.94E-03                          |
| coagulation (GO:0050817)                                                                         | 297                                  | 24                                | 8.02                                   | +                                        | 2.99                                          | 4.87E-06                                  | 1.87E-04                          |
| embryonic epithelial tube formation (GO:0001838)                                                 | 124                                  | 10                                | 3.35                                   | +                                        | 2.99                                          | 2.89E-03                                  | 4.37E-02                          |
| interaction with host (GO:0051701)                                                               | 161                                  | 13                                | 4.35                                   | +                                        | 2.99                                          | 7.19E-04                                  | 1.44E-02                          |

Continued

Supplementary Table SVII Continued

| GO biological process complete                                                                         | Homo sapiens - REFLIST (21042) | Client Text Box Input (568) | Client Text Box Input (expected) | Client Text Box Input (over/under) | Client Text Box Input (fold Enrichment) | Client Text Box Input (raw P-value) | Client Text Box Input (FDR) |
|--------------------------------------------------------------------------------------------------------|--------------------------------|-----------------------------|----------------------------------|------------------------------------|-----------------------------------------|-------------------------------------|-----------------------------|
| <b>negative regulation of signaling (GO:0023057)</b>                                                   | 1277                           | 103                         | 34.47                            | +                                  | 2.99                                    | 2.59E-22                            | 1.01E-19                    |
| positive regulation of cysteine-type endopeptidase activity involved in apoptotic process (GO:0043280) | 124                            | 10                          | 3.35                             | +                                  | 2.99                                    | 2.89E-03                            | 4.36E-02                    |
| negative regulation of apoptotic signaling pathway (GO:2001234)                                        | 211                            | 17                          | 5.7                              | +                                  | 2.98                                    | 1.19E-04                            | 3.09E-03                    |
| <b>multi-cellular organism process (GO:0044706)</b>                                                    | 212                            | 17                          | 5.72                             | +                                  | 2.97                                    | 1.26E-04                            | 3.23E-03                    |
| <b>negative regulation of cell communication (GO:0010648)</b>                                          | 1273                           | 102                         | 34.36                            | +                                  | 2.97                                    | 6.80E-22                            | 2.45E-19                    |
| positive regulation of leukocyte proliferation (GO:0070665)                                            | 137                            | 11                          | 3.7                              | +                                  | 2.97                                    | 1.88E-03                            | 3.11E-02                    |
| regulation of cell cycle G1/S phase transition (GO:1902806)                                            | 162                            | 13                          | 4.37                             | +                                  | 2.97                                    | 7.58E-04                            | 1.50E-02                    |
| homeostasis (GO:0007599)                                                                               | 300                            | 24                          | 8.1                              | +                                  | 2.96                                    | 5.71E-06                            | 2.16E-04                    |
| response to ionizing radiation (GO:0010212)                                                            | 150                            | 12                          | 4.05                             | +                                  | 2.96                                    | 1.22E-03                            | 2.21E-02                    |
| <b>negative regulation of phosphate metabolic process (GO:0045936)</b>                                 | 578                            | 46                          | 15.6                             | +                                  | 2.95                                    | 3.45E-10                            | 3.04E-08                    |
| <b>positive regulation of multicellular organismal process (GO:0051240)</b>                            | 1493                           | 119                         | 40.3                             | +                                  | 2.95                                    | 1.74E-25                            | 1.08E-22                    |
| <b>rhythmic process (GO:0048511)</b>                                                                   | 289                            | 23                          | 7.8                              | +                                  | 2.95                                    | 9.64E-06                            | 3.44E-04                    |
| isoprenoid metabolic process (GO:0006720)                                                              | 126                            | 10                          | 3.4                              | +                                  | 2.94                                    | 3.21E-03                            | 4.76E-02                    |
| <b>negative regulation of phosphorus metabolic process (GO:0010563)</b>                                | 579                            | 46                          | 15.63                            | +                                  | 2.94                                    | 3.64E-10                            | 3.17E-08                    |
| <b>regulation of cell proliferation (GO:0042127)</b>                                                   | 1588                           | 126                         | 42.87                            | +                                  | 2.94                                    | 6.72E-27                            | 5.48E-24                    |
| <b>epithelial tube morphogenesis (GO:0060562)</b>                                                      | 303                            | 24                          | 8.18                             | +                                  | 2.93                                    | 6.68E-06                            | 2.46E-04                    |
| positive regulation of cell morphogenesis involved in differentiation (GO:0010770)                     | 139                            | 11                          | 3.75                             | +                                  | 2.93                                    | 2.09E-03                            | 3.38E-02                    |
| <b>regulation of system process (GO:0044057)</b>                                                       | 505                            | 40                          | 13.63                            | +                                  | 2.93                                    | 5.78E-09                            | 4.07E-07                    |
| <b>cell morphogenesis involved in differentiation (GO:0000904)</b>                                     | 508                            | 40                          | 13.71                            | +                                  | 2.92                                    | 6.75E-09                            | 4.69E-07                    |
| <b>sensory organ morphogenesis (GO:0090596)</b>                                                        | 254                            | 20                          | 6.86                             | +                                  | 2.92                                    | 4.17E-05                            | 1.21E-03                    |
| <b>sex differentiation (GO:0007548)</b>                                                                | 266                            | 21                          | 7.18                             | +                                  | 2.92                                    | 2.60E-05                            | 7.95E-04                    |
| <b>cell morphogenesis involved in neuron differentiation (GO:0048667)</b>                              | 408                            | 32                          | 11.01                            | +                                  | 2.91                                    | 2.44E-07                            | 1.24E-05                    |
| cellular response to toxic substance (GO:0097237)                                                      | 204                            | 16                          | 5.51                             | +                                  | 2.91                                    | 2.49E-04                            | 5.74E-03                    |
| <b>negative regulation of cell proliferation (GO:0008285)</b>                                          | 661                            | 52                          | 17.84                            | +                                  | 2.91                                    | 3.38E-11                            | 3.26E-09                    |

Continued

Supplementary Table SVII Continued

| GO biological process complete                                                   | Homo sapiens<br>- REFLIST<br>(21042) | Client Text<br>Box Input<br>(568) | Client Text<br>Box Input<br>(expected) | Client Text<br>Box Input<br>(over/under) | Client Text<br>Box Input (fold<br>Enrichment) | Client Text<br>Box Input (raw<br>P-value) | Client Text<br>Box Input<br>(FDR) |
|----------------------------------------------------------------------------------|--------------------------------------|-----------------------------------|----------------------------------------|------------------------------------------|-----------------------------------------------|-------------------------------------------|-----------------------------------|
| <b>response to oxidative stress (GO:0006979)</b>                                 | 371                                  | 29                                | 10.01                                  | +                                        | 2.9                                           | 9.54E-07                                  | 4.29E-05                          |
| positive regulation of endopeptidase activity<br>(GO:0010950)                    | 154                                  | 12                                | 4.16                                   | +                                        | 2.89                                          | 1.51E-03                                  | 2.60E-02                          |
| <b>cellular response to drug (GO:00335690)</b>                                   | 309                                  | 24                                | 8.34                                   | +                                        | 2.88                                          | 9.07E-06                                  | 3.28E-04                          |
| <b>negative regulation of canonical Wnt signaling<br/>pathway (GO:0090090)</b>   | 167                                  | 13                                | 4.51                                   | +                                        | 2.88                                          | 9.84E-04                                  | 1.85E-02                          |
| regulation of endocytosis (GO:0030100)                                           | 219                                  | 17                                | 5.91                                   | +                                        | 2.88                                          | 1.81E-04                                  | 4.39E-03                          |
| <b>axonogenesis (GO:0007409)</b>                                                 | 349                                  | 27                                | 9.42                                   | +                                        | 2.87                                          | 2.70E-06                                  | 1.11E-04                          |
| <b>cellular response to tumor necrosis factor<br/>(GO:0071356)</b>               | 245                                  | 19                                | 6.61                                   | +                                        | 2.87                                          | 7.79E-05                                  | 2.10E-03                          |
| glial cell differentiation (GO:0010001)                                          | 155                                  | 12                                | 4.18                                   | +                                        | 2.87                                          | 1.59E-03                                  | 2.71E-02                          |
| negative regulation of proteolysis (GO:0045861)                                  | 348                                  | 27                                | 9.39                                   | +                                        | 2.87                                          | 2.57E-06                                  | 1.07E-04                          |
| <b>regulation of binding (GO:0051098)</b>                                        | 349                                  | 27                                | 9.42                                   | +                                        | 2.87                                          | 2.70E-06                                  | 1.11E-04                          |
| <b>regulation of cell growth (GO:0001558)</b>                                    | 389                                  | 30                                | 10.5                                   | +                                        | 2.86                                          | 8.05E-07                                  | 3.68E-05                          |
| <b>eye development (GO:0001654)</b>                                              | 338                                  | 26                                | 9.12                                   | +                                        | 2.85                                          | 4.55E-06                                  | 1.77E-04                          |
| <b>negative regulation of developmental process<br/>(GO:0051093)</b>             | 862                                  | 66                                | 23.27                                  | +                                        | 2.84                                          | 1.93E-13                                  | 2.48E-11                          |
| <b>regionalization (GO:0003002)</b>                                              | 313                                  | 24                                | 8.45                                   | +                                        | 2.84                                          | 1.11E-05                                  | 3.85E-04                          |
| <b>circulatory system process (GO:0003013)</b>                                   | 380                                  | 29                                | 10.26                                  | +                                        | 2.83                                          | 1.49E-06                                  | 6.49E-05                          |
| <b>negative regulation of response to stimulus<br/>(GO:0048585)</b>              | 1477                                 | 113                               | 39.87                                  | +                                        | 2.83                                          | 8.52E-23                                  | 3.67E-20                          |
| <b>positive regulation of intracellular signal<br/>transduction (GO:1902533)</b> | 968                                  | 74                                | 26.13                                  | +                                        | 2.83                                          | 6.04E-15                                  | 1.03E-12                          |
| <b>regulation of canonical Wnt signaling pathway<br/>(GO:0040828)</b>            | 249                                  | 19                                | 6.72                                   | +                                        | 2.83                                          | 9.50E-05                                  | 2.52E-03                          |
| <b>negative regulation of intracellular signal<br/>transduction (GO:1902532)</b> | 500                                  | 38                                | 13.5                                   | +                                        | 2.82                                          | 3.88E-08                                  | 2.27E-06                          |
| cellular response to nutrient levels (GO:0031669)                                | 198                                  | 15                                | 5.34                                   | +                                        | 2.81                                          | 5.40E-04                                  | 1.12E-02                          |
| gliogenesis (GO:0042063)                                                         | 198                                  | 15                                | 5.34                                   | +                                        | 2.81                                          | 5.40E-04                                  | 1.12E-02                          |
| intrinsic apoptotic signaling pathway (GO:0097193)                               | 158                                  | 12                                | 4.26                                   | +                                        | 2.81                                          | 1.85E-03                                  | 3.08E-02                          |
| <b>response to toxic substance (GO:0009636)</b>                                  | 501                                  | 38                                | 13.52                                  | +                                        | 2.81                                          | 4.07E-08                                  | 2.36E-06                          |
| <b>enzyme linked receptor protein signaling<br/>pathway (GO:0007167)</b>         | 715                                  | 54                                | 19.3                                   | +                                        | 2.8                                           | 5.75E-11                                  | 5.37E-09                          |
| epithelial cell development (GO:0002064)                                         | 185                                  | 14                                | 4.99                                   | +                                        | 2.8                                           | 8.26E-04                                  | 1.62E-02                          |
| negative regulation of protein kinase activity<br>(GO:0006469)                   | 251                                  | 19                                | 6.78                                   | +                                        | 2.8                                           | 1.05E-04                                  | 2.76E-03                          |

Continued

Supplementary Table SV11 Continued

| GO biological process complete                                              | Homo sapiens<br>- REFLIST<br>(21042) | Client Text<br>Box Input<br>(568) | Client Text<br>Box Input<br>(expected) | Client Text<br>Box Input<br>(over/under) | Client Text<br>Box Input (fold<br>Enrichment) | Client Text<br>Box Input (raw<br>P-value) | Client Text<br>Box Input<br>(FDR) |
|-----------------------------------------------------------------------------|--------------------------------------|-----------------------------------|----------------------------------------|------------------------------------------|-----------------------------------------------|-------------------------------------------|-----------------------------------|
| regulation of blood circulation (GO:1903522)                                | 278                                  | 21                                | 7.5                                    | +                                        | 2.8                                           | 4.74E-05                                  | 1.37E-03                          |
| <b>movement of cell or subcellular component (GO:0006928)</b>               | 1462                                 | 110                               | 39.46                                  | +                                        | 2.79                                          | 1.21E-21                                  | 4.28E-19                          |
| <b>response to tumor necrosis factor (GO:0034612)</b>                       | 266                                  | 20                                | 7.18                                   | +                                        | 2.79                                          | 7.58E-05                                  | 2.05E-03                          |
| tube formation (GO:0035148)                                                 | 146                                  | 11                                | 3.94                                   | +                                        | 2.79                                          | 2.98E-03                                  | 4.49E-02                          |
| regulation of receptor activity (GO:0010469)                                | 547                                  | 41                                | 14.77                                  | +                                        | 2.78                                          | 1.59E-08                                  | 1.03E-06                          |
| viral life cycle (GO:0019058)                                               | 200                                  | 15                                | 5.4                                    | +                                        | 2.78                                          | 5.95E-04                                  | 1.22E-02                          |
| <b>negative regulation of cell projection organization (GO:0031345)</b>     | 147                                  | 11                                | 3.97                                   | +                                        | 2.77                                          | 3.13E-03                                  | 4.65E-02                          |
| <b>negative regulation of multicellular organismal process (GO:0051241)</b> | 1044                                 | 78                                | 28.18                                  | +                                        | 2.77                                          | 3.24E-15                                  | 5.64E-13                          |
| <b>positive regulation of protein phosphorylation (GO:0001934)</b>          | 936                                  | 70                                | 25.27                                  | +                                        | 2.77                                          | 9.61E-14                                  | 1.35E-11                          |
| <b>blood circulation (GO:0008015)</b>                                       | 376                                  | 28                                | 10.15                                  | +                                        | 2.76                                          | 3.51E-06                                  | 1.41E-04                          |
| regulation of lymphocyte proliferation (GO:0050670)                         | 201                                  | 15                                | 5.43                                   | +                                        | 2.76                                          | 6.25E-04                                  | 1.28E-02                          |
| appendage morphogenesis (GO:0035107)                                        | 148                                  | 11                                | 4                                      | +                                        | 2.75                                          | 3.28E-03                                  | 4.84E-02                          |
| <b>forebrain development (GO:0030900)</b>                                   | 377                                  | 28                                | 10.18                                  | +                                        | 2.75                                          | 3.68E-06                                  | 1.46E-04                          |
| limb morphogenesis (GO:0035108)                                             | 148                                  | 11                                | 4                                      | +                                        | 2.75                                          | 3.28E-03                                  | 4.84E-02                          |
| <b>positive regulation of protein kinase activity (GO:0045860)</b>          | 512                                  | 38                                | 13.82                                  | +                                        | 2.75                                          | 6.88E-08                                  | 3.85E-06                          |
| regulation of mononuclear cell proliferation (GO:0032944)                   | 202                                  | 15                                | 5.45                                   | +                                        | 2.75                                          | 6.55E-04                                  | 1.34E-02                          |
| positive regulation of I-kappaB kinase/NF-kappaB signaling (GO:0043123)     | 189                                  | 14                                | 5.1                                    | +                                        | 2.74                                          | 1.00E-03                                  | 1.87E-02                          |
| cellular response to abiotic stimulus (GO:0071214)                          | 285                                  | 21                                | 7.69                                   | +                                        | 2.73                                          | 6.62E-05                                  | 1.84E-03                          |
| cellular response to environmental stimulus (GO:0104004)                    | 285                                  | 21                                | 7.69                                   | +                                        | 2.73                                          | 6.62E-05                                  | 1.84E-03                          |
| <b>positive regulation of Wnt signaling pathway (GO:0030177)</b>            | 163                                  | 12                                | 4.4                                    | +                                        | 2.73                                          | 2.35E-03                                  | 3.75E-02                          |
| regulation of T cell proliferation (GO:0042129)                             | 149                                  | 11                                | 4.02                                   | +                                        | 2.73                                          | 3.45E-03                                  | 4.94E-02                          |
| <b>negative regulation of cell differentiation (GO:0045596)</b>             | 639                                  | 47                                | 17.25                                  | +                                        | 2.72                                          | 2.39E-09                                  | 1.82E-07                          |
| regulation of protein import into nucleus (GO:0042306)                      | 177                                  | 13                                | 4.78                                   | +                                        | 2.72                                          | 1.61E-03                                  | 2.72E-02                          |
| response to lipopolysaccharide (GO:0032496)                                 | 300                                  | 22                                | 8.1                                    | +                                        | 2.72                                          | 4.77E-05                                  | 1.37E-03                          |
| <b>positive regulation of phosphorylation (GO:0042327)</b>                  | 983                                  | 72                                | 26.53                                  | +                                        | 2.71                                          | 1.07E-13                                  | 1.47E-11                          |
| <b>response to lipid (GO:0033993)</b>                                       | 834                                  | 61                                | 22.51                                  | +                                        | 2.71                                          | 1.03E-11                                  | 1.04E-09                          |

Continued

Supplementary Table SV11 Continued

| GO biological process complete                                                      | Homo sapiens<br>- REFLIST<br>(21042) | Client Text<br>Box Input<br>(568) | Client Text<br>Box Input<br>(expected) | Client Text<br>Box Input<br>(over/under) | Client Text<br>Box Input (fold<br>Enrichment) | Client Text<br>Box Input (raw<br>P-value) | Client Text<br>Box Input<br>(FDR) |
|-------------------------------------------------------------------------------------|--------------------------------------|-----------------------------------|----------------------------------------|------------------------------------------|-----------------------------------------------|-------------------------------------------|-----------------------------------|
| <b>sensory organ development (GO:0007423)</b>                                       | 519                                  | 38                                | 14.01                                  | +                                        | 2.71                                          | 9.53E-08                                  | 5.19E-06                          |
| <b>regulation of stress-activated MAPK cascade (GO:0032872)</b>                     | 206                                  | 15                                | 5.56                                   | +                                        | 2.7                                           | 7.90E-04                                  | 1.55E-02                          |
| <b>response to organic cyclic compound (GO:0014070)</b>                             | 879                                  | 64                                | 23.73                                  | +                                        | 2.7                                           | 3.66E-12                                  | 3.92E-10                          |
| <b>negative regulation of apoptotic process (GO:0043066)</b>                        | 853                                  | 62                                | 23.03                                  | +                                        | 2.69                                          | 8.79E-12                                  | 8.97E-10                          |
| <b>negative regulation of programmed cell death (GO:0043069)</b>                    | 867                                  | 63                                | 23.4                                   | +                                        | 2.69                                          | 5.94E-12                                  | 6.14E-10                          |
| <b>regulation of multicellular organismal development (GO:2000026)</b>              | 1805                                 | 131                               | 48.72                                  | +                                        | 2.69                                          | 1.26E-24                                  | 7.51E-22                          |
| cellular response to xenobiotic stimulus (GO:0071466)                               | 166                                  | 12                                | 4.48                                   | +                                        | 2.68                                          | 2.71E-03                                  | 4.14E-02                          |
| embryonic organ morphogenesis (GO:0048562)                                          | 290                                  | 21                                | 7.83                                   | +                                        | 2.68                                          | 8.33E-05                                  | 2.24E-03                          |
| regulation of protein import (GO:1904589)                                           | 180                                  | 13                                | 4.86                                   | +                                        | 2.68                                          | 1.85E-03                                  | 3.08E-02                          |
| <b>regulation of stress-activated protein kinase signaling cascade (GO:0070302)</b> | 207                                  | 15                                | 5.59                                   | +                                        | 2.68                                          | 8.28E-04                                  | 1.62E-02                          |
| <b>response to acid chemical (GO:0001101)</b>                                       | 332                                  | 24                                | 8.96                                   | +                                        | 2.68                                          | 2.72E-05                                  | 8.26E-04                          |
| response to molecule of bacterial origin (GO:0002237)                               | 318                                  | 23                                | 8.58                                   | +                                        | 2.68                                          | 3.95E-05                                  | 1.15E-03                          |
| <b>cellular component morphogenesis (GO:0032989)</b>                                | 735                                  | 53                                | 19.84                                  | +                                        | 2.67                                          | 4.16E-10                                  | 3.56E-08                          |
| <b>negative regulation of cell development (GO:0010721)</b>                         | 277                                  | 20                                | 7.48                                   | +                                        | 2.67                                          | 1.27E-04                                  | 3.25E-03                          |
| <b>cell morphogenesis (GO:0000902)</b>                                              | 640                                  | 46                                | 17.28                                  | +                                        | 2.66                                          | 6.94E-09                                  | 4.80E-07                          |
| positive regulation of protein secretion (GO:0050714)                               | 237                                  | 17                                | 6.4                                    | +                                        | 2.66                                          | 4.27E-04                                  | 9.23E-03                          |
| <b>skin development (GO:0043588)</b>                                                | 376                                  | 27                                | 10.15                                  | +                                        | 2.66                                          | 9.70E-06                                  | 3.46E-04                          |
| <b>response to drug (GO:0042493)</b>                                                | 911                                  | 65                                | 24.59                                  | +                                        | 2.64                                          | 8.38E-12                                  | 8.61E-10                          |
| central nervous system neuron differentiation (GO:0021953)                          | 169                                  | 12                                | 4.56                                   | +                                        | 2.63                                          | 3.10E-03                                  | 4.62E-02                          |
| <b>developmental process involved in reproduction (GO:0003006)</b>                  | 649                                  | 46                                | 17.52                                  | +                                        | 2.63                                          | 1.71E-08                                  | 1.09E-06                          |
| <b>gland development (GO:0048732)</b>                                               | 409                                  | 29                                | 11.04                                  | +                                        | 2.63                                          | 5.74E-06                                  | 2.16E-04                          |
| regulation of leukocyte differentiation (GO:1902105)                                | 254                                  | 18                                | 6.86                                   | +                                        | 2.63                                          | 3.35E-04                                  | 7.49E-03                          |
| cell chemotaxis (GO:0060326)                                                        | 184                                  | 13                                | 4.97                                   | +                                        | 2.62                                          | 2.21E-03                                  | 3.55E-02                          |
| negative regulation of kinase activity (GO:0033673)                                 | 269                                  | 19                                | 7.26                                   | +                                        | 2.62                                          | 2.41E-04                                  | 5.57E-03                          |
| <b>positive regulation of kinase activity (GO:0033674)</b>                          | 551                                  | 39                                | 14.87                                  | +                                        | 2.62                                          | 1.47E-07                                  | 7.80E-06                          |

Continued



Supplementary Table SVII Continued

| GO biological process complete                                          | Homo sapiens - REFLIST (21042) | Client Text Box Input (568) | Client Text Box Input (expected) | Client Text Box Input (over/under) | Client Text Box Input (fold Enrichment) | Client Text Box Input (raw P-value) | Client Text Box Input (FDR) |
|-------------------------------------------------------------------------|--------------------------------|-----------------------------|----------------------------------|------------------------------------|-----------------------------------------|-------------------------------------|-----------------------------|
| <b>negative regulation of immune system process (GO:0002683)</b>        | 398                            | 28                          | 10.74                            | +                                  | 2.61                                    | 9.50E-06                            | 3.41E-04                    |
| positive regulation of cell cycle process (GO:0090068)                  | 270                            | 19                          | 7.29                             | +                                  | 2.61                                    | 2.52E-04                            | 5.79E-03                    |
| regulation of protein localization to nucleus (GO:1900180)              | 227                            | 16                          | 6.13                             | +                                  | 2.61                                    | 7.43E-04                            | 1.47E-02                    |
| <b>regulation of protein phosphorylation (GO:0001932)</b>               | 1362                           | 96                          | 36.77                            | +                                  | 2.61                                    | 4.65E-17                            | 1.03E-14                    |
| <b>positive regulation of phosphate metabolic process (GO:0045937)</b>  | 1098                           | 77                          | 29.64                            | +                                  | 2.6                                     | 1.22E-13                            | 1.61E-11                    |
| <b>positive regulation of phosphorus metabolic process (GO:0010562)</b> | 1098                           | 77                          | 29.64                            | +                                  | 2.6                                     | 1.22E-13                            | 1.62E-11                    |
| regulation of cytokine secretion (GO:0050707)                           | 171                            | 12                          | 4.62                             | +                                  | 2.6                                     | 3.39E-03                            | 4.89E-02                    |
| <b>regulation of Wnt signaling pathway (GO:0030111)</b>                 | 328                            | 23                          | 8.85                             | +                                  | 2.6                                     | 6.15E-05                            | 1.72E-03                    |
| <b>cellular response to hypoxia (GO:0071456)</b>                        | 186                            | 13                          | 5.02                             | +                                  | 2.59                                    | 2.42E-03                            | 3.80E-02                    |
| <b>negative regulation of neuron differentiation (GO:0045665)</b>       | 186                            | 13                          | 5.02                             | +                                  | 2.59                                    | 2.42E-03                            | 3.80E-02                    |
| <b>negative regulation of Wnt signaling pathway (GO:0030178)</b>        | 200                            | 14                          | 5.4                              | +                                  | 2.59                                    | 1.65E-03                            | 2.78E-02                    |
| positive regulation of DNA metabolic process (GO:0051054)               | 215                            | 15                          | 5.8                              | +                                  | 2.58                                    | 1.18E-03                            | 2.15E-02                    |
| <b>negative regulation of cell death (GO:0060548)</b>                   | 946                            | 65                          | 25.54                            | +                                  | 2.55                                    | 2.68E-11                            | 2.59E-09                    |
| regulation of myeloid cell differentiation (GO:0045637)                 | 218                            | 15                          | 5.88                             | +                                  | 2.55                                    | 1.35E-03                            | 2.39E-02                    |
| <b>chordate embryonic development (GO:0043009)</b>                      | 568                            | 39                          | 15.33                            | +                                  | 2.54                                    | 3.79E-07                            | 1.87E-05                    |
| <b>embryo development ending in birth or egg hatching (GO:0009792)</b>  | 574                            | 39                          | 15.49                            | +                                  | 2.52                                    | 4.54E-07                            | 2.19E-05                    |
| <b>epidermis development (GO:0008544)</b>                               | 412                            | 28                          | 11.12                            | +                                  | 2.52                                    | 2.44E-05                            | 7.49E-04                    |
| <b>neuron projection morphogenesis (GO:0048812)</b>                     | 456                            | 31                          | 12.31                            | +                                  | 2.52                                    | 8.10E-06                            | 2.96E-04                    |
| regulation of hormone levels (GO:0010817)                               | 514                            | 35                          | 13.87                            | +                                  | 2.52                                    | 1.85E-06                            | 7.95E-05                    |
| regulation of hormone secretion (GO:0046883)                            | 265                            | 18                          | 7.15                             | +                                  | 2.52                                    | 5.37E-04                            | 1.12E-02                    |
| <b>response to abiotic stimulus (GO:0009628)</b>                        | 1118                           | 76                          | 30.18                            | +                                  | 2.52                                    | 9.27E-13                            | 1.08E-10                    |
| positive regulation of cytokine production (GO:0001819)                 | 398                            | 27                          | 10.74                            | +                                  | 2.51                                    | 3.58E-05                            | 1.05E-03                    |
| positive regulation of protein transport (GO:0051222)                   | 488                            | 33                          | 13.17                            | +                                  | 2.51                                    | 4.19E-06                            | 1.64E-04                    |
| <b>regulation of developmental process (GO:0050793)</b>                 | 2379                           | 161                         | 64.22                            | +                                  | 2.51                                    | 1.48E-27                            | 1.43E-24                    |

Continued

**Supplementary Table SVII Continued**

| <b>GO biological process complete</b>                                     | <b>Homo sapiens - REFLIST (21042)</b> | <b>Client Text Box Input (568)</b> | <b>Client Text Box Input (expected)</b> | <b>Client Text Box Input (over/under)</b> | <b>Client Text Box Input (fold Enrichment)</b> | <b>Client Text Box Input (raw P-value)</b> | <b>Client Text Box Input (FDR)</b> |
|---------------------------------------------------------------------------|---------------------------------------|------------------------------------|-----------------------------------------|-------------------------------------------|------------------------------------------------|--------------------------------------------|------------------------------------|
| <b>regulation of response to external stimulus (GO:0032101)</b>           | 782                                   | 53                                 | 21.11                                   | +                                         | 2.51                                           | 3.30E-09                                   | 2.43E-07                           |
| cellular response to decreased oxygen levels (GO:0036294)                 | 193                                   | 13                                 | 5.21                                    | +                                         | 2.5                                            | 3.26E-03                                   | 4.81E-02                           |
| <b>plasma membrane bounded cell projection morphogenesis (GO:0120039)</b> | 460                                   | 31                                 | 12.42                                   | +                                         | 2.5                                            | 8.97E-06                                   | 3.25E-04                           |
| <b>positive regulation of cell cycle (GO:0045787)</b>                     | 371                                   | 25                                 | 10.01                                   | +                                         | 2.5                                            | 7.85E-05                                   | 2.11E-03                           |
| positive regulation of secretion (GO:0051047)                             | 386                                   | 26                                 | 10.42                                   | +                                         | 2.5                                            | 5.47E-05                                   | 1.55E-03                           |
| <b>regulation of apoptotic process (GO:0042981)</b>                       | 1497                                  | 101                                | 40.41                                   | +                                         | 2.5                                            | 9.25E-17                                   | 1.86E-14                           |
| <b>regulation of programmed cell death (GO:0043067)</b>                   | 1512                                  | 102                                | 40.81                                   | +                                         | 2.5                                            | 6.33E-17                                   | 1.33E-14                           |
| <b>regulation of protein kinase activity (GO:0045859)</b>                 | 784                                   | 53                                 | 21.16                                   | +                                         | 2.5                                            | 3.57E-09                                   | 2.58E-07                           |
| <b>negative regulation of catalytic activity (GO:0043086)</b>             | 891                                   | 60                                 | 24.05                                   | +                                         | 2.49                                           | 4.91E-10                                   | 4.12E-08                           |
| <b>cell projection morphogenesis (GO:0048858)</b>                         | 463                                   | 31                                 | 12.5                                    | +                                         | 2.48                                           | 9.76E-06                                   | 3.47E-04                           |
| <b>cellular response to oxygen levels (GO:0071453)</b>                    | 209                                   | 14                                 | 5.64                                    | +                                         | 2.48                                           | 2.42E-03                                   | 3.80E-02                           |
| <b>negative regulation of molecular function (GO:0044092)</b>             | 1178                                  | 79                                 | 31.8                                    | +                                         | 2.48                                           | 4.92E-13                                   | 5.91E-11                           |
| <b>neuron projection development (GO:0031175)</b>                         | 601                                   | 40                                 | 16.22                                   | +                                         | 2.47                                           | 4.83E-07                                   | 2.33E-05                           |
| <b>regulation of cell death (GO:0010941)</b>                              | 1629                                  | 108                                | 43.97                                   | +                                         | 2.46                                           | 2.10E-17                                   | 4.85E-15                           |
| <b>regulation of cell differentiation (GO:0045595)</b>                    | 1643                                  | 109                                | 44.35                                   | +                                         | 2.46                                           | 1.38E-17                                   | 3.28E-15                           |
| <b>regulation of phosphorylation (GO:0042325)</b>                         | 1490                                  | 99                                 | 40.22                                   | +                                         | 2.46                                           | 5.81E-16                                   | 1.11E-13                           |
| positive regulation of peptide secretion (GO:0002793)                     | 257                                   | 17                                 | 6.94                                    | +                                         | 2.45                                           | 9.98E-04                                   | 1.86E-02                           |
| <b>regulation of multicellular organismal process (GO:0051239)</b>        | 2777                                  | 184                                | 74.96                                   | +                                         | 2.45                                           | 5.06E-31                                   | 6.54E-28                           |
| <b>apoptotic process (GO:0006915)</b>                                     | 910                                   | 60                                 | 24.56                                   | +                                         | 2.44                                           | 8.15E-10                                   | 6.68E-08                           |
| regulation of cytokine production (GO:0001817)                            | 623                                   | 41                                 | 16.82                                   | +                                         | 2.44                                           | 4.44E-07                                   | 2.15E-05                           |
| <b>cellular response to organic cyclic compound (GO:0071407)</b>          | 503                                   | 33                                 | 13.58                                   | +                                         | 2.43                                           | 6.72E-06                                   | 2.47E-04                           |
| <b>animal organ development (GO:0048513)</b>                              | 2988                                  | 195                                | 80.66                                   | +                                         | 2.42                                           | 3.42E-32                                   | 4.82E-29                           |
| cell fate commitment (GO:0045165)                                         | 230                                   | 15                                 | 6.21                                    | +                                         | 2.42                                           | 2.20E-03                                   | 3.55E-02                           |
| in utero embryonic development (GO:0001701)                               | 322                                   | 21                                 | 8.69                                    | +                                         | 2.42                                           | 4.20E-04                                   | 9.10E-03                           |
| <b>positive regulation of nervous system development (GO:0051962)</b>     | 460                                   | 30                                 | 12.42                                   | +                                         | 2.42                                           | 2.00E-05                                   | 6.32E-04                           |

Continued

Supplementary Table SVII Continued

| GO biological process complete                                            | Homo sapiens - REFLIST (21042) | Client Text Box Input (568) | Client Text Box Input (expected) | Client Text Box Input (over/under) | Client Text Box Input (fold Enrichment) | Client Text Box Input (raw P-value) | Client Text Box Input (FDR) |
|---------------------------------------------------------------------------|--------------------------------|-----------------------------|----------------------------------|------------------------------------|-----------------------------------------|-------------------------------------|-----------------------------|
| cellular response to organonitrogen compound (GO:0071417)                 | 491                            | 32                          | 13.25                            | +                                  | 2.41                                    | 1.05E-05                            | 3.67E-04                    |
| positive regulation of cell development (GO:0010720)                      | 462                            | 30                          | 12.47                            | +                                  | 2.41                                    | 2.13E-05                            | 6.64E-04                    |
| response to cytokine (GO:0034097)                                         | 921                            | 60                          | 24.86                            | +                                  | 2.41                                    | 1.18E-09                            | 9.58E-08                    |
| response to endogenous stimulus (GO:0009719)                              | 1368                           | 89                          | 36.93                            | +                                  | 2.41                                    | 6.41E-14                            | 9.46E-12                    |
| positive regulation of neuron projection development (GO:0010976)         | 216                            | 14                          | 5.83                             | +                                  | 2.4                                     | 3.20E-03                            | 4.75E-02                    |
| positive regulation of protein modification process (GO:0031401)          | 1202                           | 78                          | 32.45                            | +                                  | 2.4                                     | 3.47E-12                            | 3.74E-10                    |
| regulation of kinase activity (GO:0043549)                                | 849                            | 55                          | 22.92                            | +                                  | 2.4                                     | 7.49E-09                            | 5.12E-07                    |
| cell development (GO:0048468)                                             | 1486                           | 96                          | 40.11                            | +                                  | 2.39                                    | 9.44E-15                            | 1.56E-12                    |
| cell death (GO:0008219)                                                   | 1074                           | 69                          | 28.99                            | +                                  | 2.38                                    | 1.12E-10                            | 1.03E-08                    |
| positive regulation of signal transduction (GO:0009967)                   | 1510                           | 97                          | 40.76                            | +                                  | 2.38                                    | 8.48E-15                            | 1.41E-12                    |
| cell part morphogenesis (GO:0032990)                                      | 484                            | 31                          | 13.06                            | +                                  | 2.37                                    | 1.93E-05                            | 6.16E-04                    |
| cellular response to cytokine stimulus (GO:0071345)                       | 827                            | 53                          | 22.32                            | +                                  | 2.37                                    | 1.97E-08                            | 1.23E-06                    |
| cellular response to oxygen-containing compound (GO:1901701)              | 905                            | 58                          | 24.43                            | +                                  | 2.37                                    | 5.37E-09                            | 3.84E-07                    |
| negative regulation of protein metabolic process (GO:0051248)             | 1125                           | 72                          | 30.37                            | +                                  | 2.37                                    | 4.61E-11                            | 4.39E-09                    |
| pattern specification process (GO:007389)                                 | 406                            | 26                          | 10.96                            | +                                  | 2.37                                    | 9.49E-05                            | 2.52E-03                    |
| regulation of intracellular signal transduction (GO:1902531)              | 1800                           | 115                         | 48.59                            | +                                  | 2.37                                    | 2.16E-17                            | 4.93E-15                    |
| activation of protein kinase activity (GO:0032147)                        | 315                            | 20                          | 8.5                              | +                                  | 2.35                                    | 7.30E-04                            | 1.45E-02                    |
| positive regulation of neurogenesis (GO:0050769)                          | 394                            | 25                          | 10.64                            | +                                  | 2.35                                    | 1.47E-04                            | 3.68E-03                    |
| growth (GO:0040007)                                                       | 395                            | 25                          | 10.66                            | +                                  | 2.34                                    | 1.51E-04                            | 3.78E-03                    |
| positive regulation of establishment of protein localization (GO:1904951) | 523                            | 33                          | 14.12                            | +                                  | 2.34                                    | 1.82E-05                            | 5.86E-04                    |
| positive regulation of signaling (GO:0023056)                             | 1650                           | 104                         | 44.54                            | +                                  | 2.34                                    | 2.37E-15                            | 4.27E-13                    |
| regulation of growth (GO:0040008)                                         | 649                            | 41                          | 17.52                            | +                                  | 2.34                                    | 1.30E-06                            | 5.76E-05                    |
| inflammatory response (GO:0006954)                                        | 462                            | 29                          | 12.47                            | +                                  | 2.33                                    | 7.39E-05                            | 2.00E-03                    |
| negative regulation of cellular protein metabolic process (GO:0032269)    | 1066                           | 67                          | 28.78                            | +                                  | 2.33                                    | 6.55E-10                            | 5.40E-08                    |
| regulation of cell development (GO:0060284)                               | 794                            | 50                          | 21.43                            | +                                  | 2.33                                    | 1.14E-07                            | 6.15E-06                    |

Continued

Supplementary Table SVII Continued

| GO biological process complete                                                  | Homo sapiens<br>- REFLIST<br>(21042) | Client Text<br>Box Input<br>(568) | Client Text<br>Box Input<br>(expected) | Client Text<br>Box Input<br>(over/under) | Client Text<br>Box Input (fold<br>Enrichment) | Client Text<br>Box Input (raw<br>P-value) | Client Text<br>Box Input<br>(FDR) |
|---------------------------------------------------------------------------------|--------------------------------------|-----------------------------------|----------------------------------------|------------------------------------------|-----------------------------------------------|-------------------------------------------|-----------------------------------|
| regulation of small GTPase mediated signal transduction (GO:0051056)            | 318                                  | 20                                | 8.58                                   | +                                        | 2.33                                          | 7.91E-04                                  | 1.55E-02                          |
| response to oxygen-containing compound (GO:1901700)                             | 1445                                 | 91                                | 39.01                                  | +                                        | 2.33                                          | 2.44E-13                                  | 3.03E-11                          |
| developmental growth (GO:0048589)                                               | 352                                  | 22                                | 9.5                                    | +                                        | 2.32                                          | 4.47E-04                                  | 9.61E-03                          |
| positive regulation of cell communication (GO:0010647)                          | 1643                                 | 103                               | 44.35                                  | +                                        | 2.32                                          | 6.97E-15                                  | 1.17E-12                          |
| response to hormone (GO:0009725)                                                | 877                                  | 55                                | 23.67                                  | +                                        | 2.32                                          | 2.33E-08                                  | 1.43E-06                          |
| positive regulation of cell-cell adhesion (GO:0022409)                          | 257                                  | 16                                | 6.94                                   | +                                        | 2.31                                          | 3.14E-03                                  | 4.66E-02                          |
| positive regulation of transferase activity (GO:0051347)                        | 690                                  | 43                                | 18.63                                  | +                                        | 2.31                                          | 1.42E-06                                  | 6.19E-05                          |
| cellular response to endogenous stimulus (GO:0071495)                           | 1113                                 | 69                                | 30.04                                  | +                                        | 2.3                                           | 4.73E-10                                  | 3.98E-08                          |
| cellular response to lipid (GO:0071396)                                         | 486                                  | 30                                | 13.12                                  | +                                        | 2.29                                          | 6.13E-05                                  | 1.72E-03                          |
| positive regulation of cellular protein metabolic process (GO:0032270)          | 1520                                 | 94                                | 41.03                                  | +                                        | 2.29                                          | 2.63E-13                                  | 3.24E-11                          |
| regulation of cell morphogenesis (GO:0022604)                                   | 436                                  | 27                                | 11.77                                  | +                                        | 2.29                                          | 1.60E-04                                  | 3.95E-03                          |
| regulation of cell projection organization (GO:0031344)                         | 550                                  | 34                                | 14.85                                  | +                                        | 2.29                                          | 1.70E-05                                  | 5.56E-04                          |
| transmembrane receptor protein tyrosine kinase signaling pathway (GO:007169)    | 518                                  | 32                                | 13.98                                  | +                                        | 2.29                                          | 3.21E-05                                  | 9.58E-04                          |
| epithelial cell differentiation (GO:0030855)                                    | 667                                  | 41                                | 18                                     | +                                        | 2.28                                          | 3.20E-06                                  | 1.29E-04                          |
| programmed cell death (GO:0012501)                                              | 1039                                 | 64                                | 28.05                                  | +                                        | 2.28                                          | 2.85E-09                                  | 2.14E-07                          |
| regulation of DNA binding transcription factor activity (GO:0051090)            | 390                                  | 24                                | 10.53                                  | +                                        | 2.28                                          | 4.58E-04                                  | 9.82E-03                          |
| positive regulation of secretion by cell (GO:1903532)                           | 359                                  | 22                                | 9.69                                   | +                                        | 2.27                                          | 5.54E-04                                  | 1.15E-02                          |
| regulation of protein secretion (GO:0050708)                                    | 424                                  | 26                                | 11.45                                  | +                                        | 2.27                                          | 2.39E-04                                  | 5.53E-03                          |
| actin filament-based process (GO:0030029)                                       | 509                                  | 31                                | 13.74                                  | +                                        | 2.26                                          | 5.27E-05                                  | 1.51E-03                          |
| positive regulation of cell projection organization (GO:0031346)                | 312                                  | 19                                | 8.42                                   | +                                        | 2.26                                          | 1.44E-03                                  | 2.49E-02                          |
| regulation of phosphate metabolic process (GO:0019220)                          | 1723                                 | 105                               | 46.51                                  | +                                        | 2.26                                          | 1.55E-14                                  | 2.43E-12                          |
| regulation of phosphorus metabolic process (GO:0051174)                         | 1737                                 | 106                               | 46.89                                  | +                                        | 2.26                                          | 1.04E-14                                  | 1.68E-12                          |
| regulation of plasma membrane bounded cell projection organization (GO:0120035) | 541                                  | 33                                | 14.6                                   | +                                        | 2.26                                          | 2.82E-05                                  | 8.54E-04                          |
| positive regulation of cellular component organization (GO:0051130)             | 1167                                 | 71                                | 31.5                                   | +                                        | 2.25                                          | 6.12E-10                                  | 5.07E-08                          |

Continued

Supplementary Table SVII Continued

| GO biological process complete                                   | Homo sapiens<br>- REFLIST<br>(21042) | Client Text<br>Box Input<br>(568) | Client Text<br>Box Input<br>(expected) | Client Text<br>Box Input<br>(over/under) | Client Text<br>Box Input (fold<br>Enrichment) | Client Text<br>Box Input (raw<br>P-value) | Client Text<br>Box Input<br>(FDR) |
|------------------------------------------------------------------|--------------------------------------|-----------------------------------|----------------------------------------|------------------------------------------|-----------------------------------------------|-------------------------------------------|-----------------------------------|
| neuron development (GO:0048666)                                  | 744                                  | 45                                | 20.08                                  | +                                        | 2.24                                          | 1.18E-06                                  | 5.23E-05                          |
| regulation of actin filament-based process (GO:0032970)          | 347                                  | 21                                | 9.37                                   | +                                        | 2.24                                          | 8.51E-04                                  | 1.66E-02                          |
| positive regulation of protein metabolic process (GO:0051247)    | 1612                                 | 97                                | 43.51                                  | +                                        | 2.23                                          | 3.86E-13                                  | 4.68E-11                          |
| head development (GO:0060322)                                    | 734                                  | 44                                | 19.81                                  | +                                        | 2.22                                          | 1.90E-06                                  | 8.11E-05                          |
| regulation of apoptotic signaling pathway (GO:2001233)           | 383                                  | 23                                | 10.34                                  | +                                        | 2.22                                          | 7.29E-04                                  | 1.46E-02                          |
| regulation of cell-cell adhesion (GO:0022407)                    | 418                                  | 25                                | 11.28                                  | +                                        | 2.22                                          | 4.00E-04                                  | 8.69E-03                          |
| response to extracellular stimulus (GO:0009991)                  | 483                                  | 29                                | 13.04                                  | +                                        | 2.22                                          | 1.15E-04                                  | 2.99E-03                          |
| regulation of neuron projection development (GO:0010975)         | 385                                  | 23                                | 10.39                                  | +                                        | 2.21                                          | 7.54E-04                                  | 1.49E-02                          |
| regulation of peptide secretion (GO:0002791)                     | 452                                  | 27                                | 12.2                                   | +                                        | 2.21                                          | 2.21E-04                                  | 5.20E-03                          |
| negative regulation of protein modification process (GO:0031400) | 622                                  | 37                                | 16.79                                  | +                                        | 2.2                                           | 1.71E-05                                  | 5.56E-04                          |
| positive regulation of transport (GO:0051050)                    | 978                                  | 58                                | 26.4                                   | +                                        | 2.2                                           | 6.86E-08                                  | 3.85E-06                          |
| regulation of hemopoiesis (GO:1903706)                           | 421                                  | 25                                | 11.36                                  | +                                        | 2.2                                           | 4.27E-04                                  | 9.22E-03                          |
| regulation of homeostatic process (GO:0032844)                   | 471                                  | 28                                | 12.71                                  | +                                        | 2.2                                           | 1.74E-04                                  | 4.25E-03                          |
| regulation of protein modification process (GO:0031399)          | 1753                                 | 104                               | 47.32                                  | +                                        | 2.2                                           | 9.91E-14                                  | 1.37E-11                          |
| system development (GO:0048731)                                  | 4173                                 | 247                               | 112.64                                 | +                                        | 2.19                                          | 3.82E-36                                  | 7.41E-33                          |
| brain development (GO:0007420)                                   | 697                                  | 41                                | 18.81                                  | +                                        | 2.18                                          | 9.50E-06                                  | 3.42E-04                          |
| cellular response to nitrogen compound (GO:1901699)              | 577                                  | 34                                | 15.58                                  | +                                        | 2.18                                          | 4.75E-05                                  | 1.37E-03                          |
| multicellular organism development (GO:0007275)                  | 4769                                 | 278                               | 128.73                                 | +                                        | 2.16                                          | 3.04E-41                                  | 1.57E-37                          |
| response to peptide (GO:1901652)                                 | 446                                  | 26                                | 12.04                                  | +                                        | 2.16                                          | 3.88E-04                                  | 8.46E-03                          |
| response to external stimulus (GO:0009605)                       | 1893                                 | 110                               | 51.1                                   | +                                        | 2.15                                          | 6.62E-14                                  | 9.60E-12                          |
| response to peptide hormone (GO:0043434)                         | 379                                  | 22                                | 10.23                                  | +                                        | 2.15                                          | 1.26E-03                                  | 2.28E-02                          |
| cell activation (GO:0001775)                                     | 1019                                 | 59                                | 27.51                                  | +                                        | 2.14                                          | 1.26E-07                                  | 6.74E-06                          |
| central nervous system development (GO:0007417)                  | 899                                  | 52                                | 24.27                                  | +                                        | 2.14                                          | 6.71E-07                                  | 3.15E-05                          |
| regulation of localization (GO:0032879)                          | 2595                                 | 150                               | 70.05                                  | +                                        | 2.14                                          | 5.68E-19                                  | 1.54E-16                          |
| regulation of neurogenesis (GO:0050767)                          | 675                                  | 39                                | 18.22                                  | +                                        | 2.14                                          | 2.11E-05                                  | 6.61E-04                          |
| regulation of signal transduction (GO:0009966)                   | 3083                                 | 178                               | 83.22                                  | +                                        | 2.14                                          | 5.15E-23                                  | 2.28E-20                          |
| response to organonitrogen compound (GO:0010243)                 | 884                                  | 51                                | 23.86                                  | +                                        | 2.14                                          | 9.42E-07                                  | 4.25E-05                          |

Continued

Supplementary Table SVII Continued

| GO biological process complete                                    | Homo sapiens<br>- REFLIST<br>(21042) | Client Text<br>Box Input<br>(568) | Client Text<br>Box Input<br>(expected) | Client Text<br>Box Input<br>(over/under) | Client Text<br>Box Input (fold<br>Enrichment) | Client Text<br>Box Input (raw<br>P-value) | Client Text<br>Box Input<br>(FDR) |
|-------------------------------------------------------------------|--------------------------------------|-----------------------------------|----------------------------------------|------------------------------------------|-----------------------------------------------|-------------------------------------------|-----------------------------------|
| response to radiation (GO:0009314)                                | 432                                  | 25                                | 11.66                                  | +                                        | 2.14                                          | 5.56E-04                                  | 1.15E-02                          |
| <b>anatomical structure development (GO:0048856)</b>              | 5137                                 | 296                               | 138.67                                 | +                                        | 2.13                                          | 3.59E-44                                  | 5.57E-40                          |
| regulation of cell activation (GO:0050865)                        | 574                                  | 33                                | 15.49                                  | +                                        | 2.13                                          | 8.64E-05                                  | 2.31E-03                          |
| <b>cellular response to organic substance (GO:0071310)</b>        | 2150                                 | 123                               | 58.04                                  | +                                        | 2.12                                          | 3.96E-15                                  | 6.81E-13                          |
| <b>cytokine-mediated signaling pathway (GO:0019221)</b>           | 541                                  | 31                                | 14.6                                   | +                                        | 2.12                                          | 1.57E-04                                  | 3.90E-03                          |
| <b>neuron differentiation (GO:0030182)</b>                        | 925                                  | 53                                | 24.97                                  | +                                        | 2.12                                          | 6.14E-07                                  | 2.90E-05                          |
| positive regulation of cellular protein localization (GO:1903829) | 401                                  | 23                                | 10.82                                  | +                                        | 2.12                                          | 1.06E-03                                  | 1.96E-02                          |
| regulation of protein transport (GO:0051223)                      | 787                                  | 45                                | 21.24                                  | +                                        | 2.12                                          | 6.47E-06                                  | 2.39E-04                          |
| <b>regulation of hydrolase activity (GO:0051336)</b>              | 1194                                 | 68                                | 32.23                                  | +                                        | 2.11                                          | 1.77E-08                                  | 1.12E-06                          |
| <b>post-translational protein modification (GO:0043687)</b>       | 440                                  | 25                                | 11.88                                  | +                                        | 2.1                                           | 9.85E-04                                  | 1.84E-02                          |
| regulation of peptide transport (GO:0090087)                      | 817                                  | 46                                | 22.05                                  | +                                        | 2.09                                          | 5.94E-06                                  | 2.22E-04                          |
| positive regulation of organelle organization (GO:0010638)        | 622                                  | 35                                | 16.79                                  | +                                        | 2.08                                          | 9.08E-05                                  | 2.42E-03                          |
| <b>regulation of cell communication (GO:0010646)</b>              | 3374                                 | 189                               | 91.08                                  | +                                        | 2.08                                          | 3.30E-23                                  | 1.55E-20                          |
| <b>secretion (GO:0046903)</b>                                     | 1071                                 | 60                                | 28.91                                  | +                                        | 2.08                                          | 2.56E-07                                  | 1.28E-05                          |
| <b>secretion by cell (GO:0032940)</b>                             | 960                                  | 54                                | 25.91                                  | +                                        | 2.08                                          | 9.03E-07                                  | 4.11E-05                          |
| <b>cell surface receptor signaling pathway (GO:0007166)</b>       | 2278                                 | 127                               | 61.49                                  | +                                        | 2.07                                          | 1.10E-14                                  | 1.75E-12                          |
| <b>regulation of nervous system development (GO:0051960)</b>      | 770                                  | 43                                | 20.79                                  | +                                        | 2.07                                          | 1.55E-05                                  | 5.11E-04                          |
| <b>regulation of signaling (GO:0023051)</b>                       | 3423                                 | 191                               | 92.4                                   | +                                        | 2.07                                          | 3.30E-23                                  | 1.60E-20                          |
| positive regulation of cell activation (GO:0050867)               | 377                                  | 21                                | 10.18                                  | +                                        | 2.06                                          | 2.37E-03                                  | 3.73E-02                          |
| <b>regulation of transferase activity (GO:0051338)</b>            | 1024                                 | 57                                | 27.64                                  | +                                        | 2.06                                          | 6.82E-07                                  | 3.19E-05                          |
| <b>response to organic substance (GO:0010033)</b>                 | 2765                                 | 153                               | 74.64                                  | +                                        | 2.05                                          | 9.57E-18                                  | 2.32E-15                          |
| <b>neurogenesis (GO:0022008)</b>                                  | 1471                                 | 81                                | 39.71                                  | +                                        | 2.04                                          | 2.76E-09                                  | 2.08E-07                          |
| <b>cell differentiation (GO:0030154)</b>                          | 3491                                 | 191                               | 94.23                                  | +                                        | 2.03                                          | 2.50E-22                                  | 9.93E-20                          |
| cellular component disassembly (GO:0022411)                       | 419                                  | 23                                | 11.31                                  | +                                        | 2.03                                          | 2.17E-03                                  | 3.51E-02                          |
| <b>developmental process (GO:0032502)</b>                         | 5497                                 | 301                               | 148.38                                 | +                                        | 2.03                                          | 8.38E-41                                  | 3.25E-37                          |
| regulation of cellular protein localization (GO:1903827)          | 603                                  | 33                                | 16.28                                  | +                                        | 2.03                                          | 2.15E-04                                  | 5.07E-03                          |
| cell proliferation (GO:0008283)                                   | 678                                  | 37                                | 18.3                                   | +                                        | 2.02                                          | 1.08E-04                                  | 2.83E-03                          |
| <b>cellular response to chemical stimulus (GO:0070887)</b>        | 2624                                 | 143                               | 70.83                                  | +                                        | 2.02                                          | 5.27E-16                                  | 1.02E-13                          |

Continued

**Supplementary Table SV11 Continued**

| GO biological process complete                                               | Homo sapiens<br>- REFLIST<br>(21042) | Client Text<br>Box Input<br>(568) | Client Text<br>Box Input<br>(expected) | Client Text<br>Box Input<br>(over/under) | Client Text<br>Box Input (fold<br>Enrichment) | Client Text<br>Box Input (raw<br>P-value) | Client Text<br>Box Input<br>(FDR) |
|------------------------------------------------------------------------------|--------------------------------------|-----------------------------------|----------------------------------------|------------------------------------------|-----------------------------------------------|-------------------------------------------|-----------------------------------|
| <b>cellular developmental process (GO:0048869)</b>                           | 3565                                 | 193                               | 96.23                                  | +                                        | 2.01                                          | 3.66E-22                                  | 1.38E-19                          |
| regulation of establishment of protein localization<br>(GO:0070201)          | 830                                  | 45                                | 22.4                                   | +                                        | 2.01                                          | 1.94E-05                                  | 6.17E-04                          |
| <b>positive regulation of molecular function<br/>(GO:0044093)</b>            | 1761                                 | 95                                | 47.54                                  | +                                        | 2                                             | 2.54E-10                                  | 2.26E-08                          |
| <b>positive regulation of response to stimulus<br/>(GO:0048584)</b>          | 2187                                 | 118                               | 59.04                                  | +                                        | 2                                             | 8.75E-13                                  | 1.04E-10                          |
| regulation of neuron differentiation (GO:0045664)                            | 538                                  | 29                                | 14.52                                  | +                                        | 2                                             | 7.20E-04                                  | 1.44E-02                          |
| <b>response to nitrogen compound (GO:1901698)</b>                            | 998                                  | 54                                | 26.94                                  | +                                        | 2                                             | 2.58E-06                                  | 1.06E-04                          |
| hemopoiesis (GO:0030097)                                                     | 520                                  | 28                                | 14.04                                  | +                                        | 1.99                                          | 9.53E-04                                  | 1.80E-02                          |
| <b>regulated exocytosis (GO:0045055)</b>                                     | 688                                  | 37                                | 18.57                                  | +                                        | 1.99                                          | 1.27E-04                                  | 3.25E-03                          |
| <b>regulation of cellular component organization<br/>(GO:0051128)</b>        | 2326                                 | 125                               | 62.79                                  | +                                        | 1.99                                          | 1.79E-13                                  | 2.33E-11                          |
| regulation of protein localization (GO:0032880)                              | 1043                                 | 56                                | 28.15                                  | +                                        | 1.99                                          | 2.38E-06                                  | 9.92E-05                          |
| <b>generation of neurons (GO:0048699)</b>                                    | 1374                                 | 73                                | 37.09                                  | +                                        | 1.97                                          | 8.51E-08                                  | 4.66E-06                          |
| hematopoietic or lymphoid organ development<br>(GO:0048534)                  | 566                                  | 30                                | 15.28                                  | +                                        | 1.96                                          | 6.61E-04                                  | 1.34E-02                          |
| <b>nervous system development (GO:0007399)</b>                               | 2206                                 | 117                               | 59.55                                  | +                                        | 1.96                                          | 3.13E-12                                  | 3.40E-10                          |
| <b>regulation of cellular protein metabolic process<br/>(GO:0032268)</b>     | 2533                                 | 134                               | 68.37                                  | +                                        | 1.96                                          | 6.50E-14                                  | 9.51E-12                          |
| response to bacterium (GO:0009617)                                           | 566                                  | 30                                | 15.28                                  | +                                        | 1.96                                          | 6.61E-04                                  | 1.34E-02                          |
| <b>response to nutrient levels (GO:0031667)</b>                              | 453                                  | 24                                | 12.23                                  | +                                        | 1.96                                          | 3.23E-03                                  | 4.77E-02                          |
| cell-cell signaling (GO:0007267)                                             | 1142                                 | 60                                | 30.83                                  | +                                        | 1.95                                          | 1.71E-06                                  | 7.37E-05                          |
| <b>regulation of catalytic activity (GO:0050790)</b>                         | 2317                                 | 122                               | 62.54                                  | +                                        | 1.95                                          | 1.98E-12                                  | 2.20E-10                          |
| regulation of secretion (GO:0051046)                                         | 725                                  | 38                                | 19.57                                  | +                                        | 1.94                                          | 1.84E-04                                  | 4.44E-03                          |
| positive regulation of macromolecule biosynthetic process<br>(GO:0010557)    | 1687                                 | 88                                | 45.54                                  | +                                        | 1.93                                          | 6.26E-09                                  | 4.39E-07                          |
| <b>exocytosis (GO:0006887)</b>                                               | 772                                  | 40                                | 20.84                                  | +                                        | 1.92                                          | 1.81E-04                                  | 4.39E-03                          |
| <b>positive regulation of catalytic activity<br/>(GO:0043085)</b>            | 1436                                 | 74                                | 38.76                                  | +                                        | 1.91                                          | 2.48E-07                                  | 1.25E-05                          |
| <b>negative regulation of cellular process<br/>(GO:0048523)</b>              | 4454                                 | 228                               | 120.23                                 | +                                        | 1.9                                           | 8.24E-24                                  | 4.57E-21                          |
| <b>positive regulation of cellular component<br/>biogenesis (GO:0044089)</b> | 488                                  | 25                                | 13.17                                  | +                                        | 1.9                                           | 3.04E-03                                  | 4.55E-02                          |
| <b>regulation of cellular component biogenesis<br/>(GO:0044087)</b>          | 858                                  | 44                                | 23.16                                  | +                                        | 1.9                                           | 1.04E-04                                  | 2.74E-03                          |
| response to other organism (GO:0051707)                                      | 839                                  | 43                                | 22.65                                  | +                                        | 1.9                                           | 9.60E-05                                  | 2.54E-03                          |

Continued

Supplementary Table SVII Continued

| GO biological process complete                                          | Homo sapiens<br>- REFLIST<br>(21042) | Client Text<br>Box Input<br>(568) | Client Text<br>Box Input<br>(expected) | Client Text<br>Box Input<br>(over/under) | Client Text<br>Box Input (fold<br>Enrichment) | Client Text<br>Box Input (raw<br>P-value) | Client Text<br>Box Input<br>(FDR) |
|-------------------------------------------------------------------------|--------------------------------------|-----------------------------------|----------------------------------------|------------------------------------------|-----------------------------------------------|-------------------------------------------|-----------------------------------|
| response to stress (GO:0006950)                                         | 3358                                 | 172                               | 90.64                                  | +                                        | 1.9                                           | 5.94E-17                                  | 1.28E-14                          |
| regulation of molecular function (GO:0065009)                           | 3391                                 | 173                               | 91.54                                  | +                                        | 1.89                                          | 5.36E-17                                  | 1.17E-14                          |
| response to biotic stimulus (GO:0009607)                                | 881                                  | 45                                | 23.78                                  | +                                        | 1.89                                          | 8.28E-05                                  | 2.22E-03                          |
| response to external biotic stimulus (GO:0043207)                       | 841                                  | 43                                | 22.7                                   | +                                        | 1.89                                          | 1.39E-04                                  | 3.50E-03                          |
| negative regulation of cellular component organization (GO:0051129)     | 610                                  | 31                                | 16.47                                  | +                                        | 1.88                                          | 1.48E-03                                  | 2.56E-02                          |
| regulation of cellular response to stress (GO:0080135)                  | 631                                  | 32                                | 17.03                                  | +                                        | 1.88                                          | 1.15E-03                                  | 2.09E-02                          |
| regulation of protein metabolic process (GO:0051246)                    | 2778                                 | 141                               | 74.99                                  | +                                        | 1.88                                          | 2.40E-13                                  | 3.00E-11                          |
| regulation of secretion by cell (GO:1903530)                            | 670                                  | 34                                | 18.09                                  | +                                        | 1.88                                          | 6.89E-04                                  | 1.39E-02                          |
| regulation of response to stimulus (GO:0048583)                         | 4078                                 | 206                               | 110.08                                 | +                                        | 1.87                                          | 2.67E-20                                  | 8.28E-18                          |
| immune system development (GO:0002520)                                  | 598                                  | 30                                | 16.14                                  | +                                        | 1.86                                          | 2.06E-03                                  | 3.35E-02                          |
| positive regulation of cellular metabolic process (GO:0031325)          | 3051                                 | 153                               | 82.36                                  | +                                        | 1.86                                          | 3.38E-14                                  | 5.13E-12                          |
| positive regulation of macromolecule metabolic process (GO:0010604)     | 3034                                 | 152                               | 81.9                                   | +                                        | 1.86                                          | 4.68E-14                                  | 6.98E-12                          |
| regulation of leukocyte activation (GO:0002694)                         | 538                                  | 27                                | 14.52                                  | +                                        | 1.86                                          | 2.99E-03                                  | 4.49E-02                          |
| reproduction (GO:0000003)                                               | 1372                                 | 69                                | 37.04                                  | +                                        | 1.86                                          | 1.36E-06                                  | 5.94E-05                          |
| reproductive process (GO:0022414)                                       | 1371                                 | 69                                | 37.01                                  | +                                        | 1.86                                          | 1.34E-06                                  | 5.89E-05                          |
| myeloid leukocyte activation (GO:0002274)                               | 564                                  | 28                                | 15.22                                  | +                                        | 1.84                                          | 2.59E-03                                  | 3.99E-02                          |
| positive regulation of cellular process (GO:0048522)                    | 4978                                 | 247                               | 134.37                                 | +                                        | 1.84                                          | 1.57E-24                                  | 9.01E-22                          |
| positive regulation of metabolic process (GO:0009893)                   | 3268                                 | 162                               | 88.22                                  | +                                        | 1.84                                          | 1.10E-14                                  | 1.76E-12                          |
| positive regulation of nitrogen compound metabolic process (GO:0051173) | 2940                                 | 146                               | 79.36                                  | +                                        | 1.84                                          | 3.68E-13                                  | 4.49E-11                          |
| multicellular organismal process (GO:0032501)                           | 6688                                 | 331                               | 180.53                                 | +                                        | 1.83                                          | 2.31E-37                                  | 5.11E-34                          |
| positive regulation of transcription by RNA polymerase II (GO:0045944)  | 1114                                 | 55                                | 30.07                                  | +                                        | 1.83                                          | 2.92E-05                                  | 8.84E-04                          |
| leukocyte activation (GO:0045321)                                       | 873                                  | 43                                | 23.57                                  | +                                        | 1.82                                          | 2.81E-04                                  | 6.41E-03                          |
| negative regulation of biological process (GO:0048519)                  | 4952                                 | 243                               | 133.67                                 | +                                        | 1.82                                          | 2.95E-23                                  | 1.53E-20                          |
| positive regulation of biosynthetic process (GO:0009891)                | 1831                                 | 90                                | 49.43                                  | +                                        | 1.82                                          | 5.67E-08                                  | 3.22E-06                          |
| regulation of cellular localization (GO:0060341)                        | 877                                  | 43                                | 23.67                                  | +                                        | 1.82                                          | 2.92E-04                                  | 6.64E-03                          |
| regulation of response to stress (GO:0080134)                           | 1442                                 | 71                                | 38.92                                  | +                                        | 1.82                                          | 2.35E-06                                  | 9.81E-05                          |

Continued



Supplementary Table SVII Continued

| GO biological process complete                                                       | Homo sapiens<br>- REFLIST<br>(21042) | Client Text<br>Box Input<br>(568) | Client Text<br>Box Input<br>(expected) | Client Text<br>Box Input<br>(over/under) | Client Text<br>Box Input (fold<br>Enrichment) | Client Text<br>Box Input (raw<br>P-value) | Client Text<br>Box Input<br>(FDR) |
|--------------------------------------------------------------------------------------|--------------------------------------|-----------------------------------|----------------------------------------|------------------------------------------|-----------------------------------------------|-------------------------------------------|-----------------------------------|
| cellular response to hormone stimulus (GO:0032870)                                   | 598                                  | 29                                | 16.14                                  | +                                        | 1.8                                           | 3.27E-03                                  | 4.83E-02                          |
| <b>positive regulation of biological process (GO:0048518)</b>                        | 5607                                 | 273                               | 151.35                                 | +                                        | 1.8                                           | 8.36E-27                                  | 6.48E-24                          |
| regulation of proteolysis (GO:0030162)                                               | 843                                  | 41                                | 22.76                                  | +                                        | 1.8                                           | 5.10E-04                                  | 1.08E-02                          |
| positive regulation of cellular biosynthetic process (GO:0031328)                    | 1804                                 | 87                                | 48.7                                   | +                                        | 1.79                                          | 2.38E-07                                  | 1.21E-05                          |
| <b>defense response (GO:0006952)</b>                                                 | 1255                                 | 60                                | 33.88                                  | +                                        | 1.77                                          | 3.55E-05                                  | 1.04E-03                          |
| <b>positive regulation of gene expression (GO:0010628)</b>                           | 1818                                 | 87                                | 49.07                                  | +                                        | 1.77                                          | 3.80E-07                                  | 1.87E-05                          |
| positive regulation of nucleic acid-templated transcription (GO:1903508)             | 1433                                 | 68                                | 38.68                                  | +                                        | 1.76                                          | 1.13E-05                                  | 3.90E-04                          |
| positive regulation of RNA biosynthetic process (GO:1902680)                         | 1434                                 | 68                                | 38.71                                  | +                                        | 1.76                                          | 1.14E-05                                  | 3.92E-04                          |
| positive regulation of transcription, DNA-templated (GO:0045893)                     | 1433                                 | 68                                | 38.68                                  | +                                        | 1.76                                          | 1.13E-05                                  | 3.89E-04                          |
| <b>response to chemical (GO:0042221)</b>                                             | 4164                                 | 197                               | 112.4                                  | +                                        | 1.75                                          | 3.30E-16                                  | 6.47E-14                          |
| multicellular organismal reproductive process (GO:0048609)                           | 809                                  | 38                                | 21.84                                  | +                                        | 1.74                                          | 1.36E-03                                  | 2.39E-02                          |
| <b>plasma membrane bounded cell projection organization (GO:0120036)</b>             | 1021                                 | 48                                | 27.56                                  | +                                        | 1.74                                          | 3.63E-04                                  | 7.97E-03                          |
| <b>regulation of transport (GO:0051049)</b>                                          | 1849                                 | 87                                | 49.91                                  | +                                        | 1.74                                          | 7.02E-07                                  | 3.25E-05                          |
| <b>cell projection organization (GO:0030030)</b>                                     | 1050                                 | 49                                | 28.34                                  | +                                        | 1.73                                          | 3.07E-04                                  | 6.93E-03                          |
| <b>intracellular signal transduction (GO:0035556)</b>                                | 1605                                 | 75                                | 43.32                                  | +                                        | 1.73                                          | 7.13E-06                                  | 2.61E-04                          |
| <b>regulation of biological quality (GO:0065008)</b>                                 | 3628                                 | 168                               | 97.93                                  | +                                        | 1.72                                          | 1.08E-12                                  | 1.25E-10                          |
| multicellular organism reproduction (GO:0032504)                                     | 821                                  | 38                                | 22.16                                  | +                                        | 1.71                                          | 2.08E-03                                  | 3.38E-02                          |
| positive regulation of RNA metabolic process (GO:0051254)                            | 1504                                 | 69                                | 40.6                                   | +                                        | 1.7                                           | 2.61E-05                                  | 7.96E-04                          |
| <b>system process (GO:0003008)</b>                                                   | 1852                                 | 85                                | 49.99                                  | +                                        | 1.7                                           | 2.34E-06                                  | 9.81E-05                          |
| cellular response to stress (GO:0033554)                                             | 1599                                 | 73                                | 43.16                                  | +                                        | 1.69                                          | 2.09E-05                                  | 6.56E-04                          |
| <b>negative regulation of cellular metabolic process (GO:0031324)</b>                | 2516                                 | 115                               | 67.92                                  | +                                        | 1.69                                          | 3.52E-08                                  | 2.08E-06                          |
| <b>negative regulation of macromolecule metabolic process (GO:0010605)</b>           | 2546                                 | 116                               | 68.73                                  | +                                        | 1.69                                          | 2.92E-08                                  | 1.76E-06                          |
| positive regulation of nucleobase-containing compound metabolic process (GO:0045935) | 1744                                 | 79                                | 47.08                                  | +                                        | 1.68                                          | 1.09E-05                                  | 3.82E-04                          |
| <b>negative regulation of nitrogen compound metabolic process (GO:0051172)</b>       | 2347                                 | 106                               | 63.35                                  | +                                        | 1.67                                          | 2.02E-07                                  | 1.04E-05                          |

Continued

Supplementary Table SVII Continued

| GO biological process complete                                                      | Homo sapiens<br>- REFLIST<br>(21042) | Client Text<br>Box Input<br>(568) | Client Text<br>Box Input<br>(expected) | Client Text<br>Box Input<br>(over/under) | Client Text<br>Box Input (fold<br>Enrichment) | Client Text<br>Box Input (raw<br>P-value) | Client Text<br>Box Input<br>(FDR) |
|-------------------------------------------------------------------------------------|--------------------------------------|-----------------------------------|----------------------------------------|------------------------------------------|-----------------------------------------------|-------------------------------------------|-----------------------------------|
| regulation of immune system process (GO:0002682)                                    | 1531                                 | 69                                | 41.33                                  | +                                        | 1.67                                          | 4.41E-05                                  | 1.28E-03                          |
| immune system process (GO:0002376)                                                  | 2575                                 | 115                               | 69.51                                  | +                                        | 1.65                                          | 1.01E-07                                  | 5.50E-06                          |
| <b>negative regulation of metabolic process (GO:0009892)</b>                        | 2795                                 | 124                               | 75.45                                  | +                                        | 1.64                                          | 3.52E-08                                  | 2.08E-06                          |
| positive regulation of immune system process (GO:0002684)                           | 1037                                 | 46                                | 27.99                                  | +                                        | 1.64                                          | 1.67E-03                                  | 2.80E-02                          |
| <b>cell communication (GO:0007154)</b>                                              | 5447                                 | 229                               | 147.03                                 | +                                        | 1.56                                          | 1.78E-13                                  | 2.34E-11                          |
| multi-organism process (GO:0051704)                                                 | 2348                                 | 98                                | 63.38                                  | +                                        | 1.55                                          | 2.11E-05                                  | 6.59E-04                          |
| <b>signaling (GO:0023052)</b>                                                       | 5349                                 | 222                               | 144.39                                 | +                                        | 1.54                                          | 2.37E-12                                  | 2.58E-10                          |
| <b>cellular component organization (GO:0016043)</b>                                 | 5273                                 | 218                               | 142.34                                 | +                                        | 1.53                                          | 5.53E-12                                  | 5.75E-10                          |
| regulation of transcription by RNA polymerase II (GO:0006357)                       | 1986                                 | 82                                | 53.61                                  | +                                        | 1.53                                          | 1.59E-04                                  | 3.95E-03                          |
| <b>response to stimulus (GO:0050896)</b>                                            | 8142                                 | 331                               | 219.78                                 | +                                        | 1.51                                          | 2.03E-20                                  | 6.43E-18                          |
| <b>cellular response to stimulus (GO:0051716)</b>                                   | 6423                                 | 259                               | 173.38                                 | +                                        | 1.49                                          | 1.15E-13                                  | 1.57E-11                          |
| <b>signal transduction (GO:0007165)</b>                                             | 4956                                 | 199                               | 133.78                                 | +                                        | 1.49                                          | 1.25E-09                                  | 9.97E-08                          |
| <b>cellular component organization or biogenesis (GO:0071840)</b>                   | 5498                                 | 218                               | 148.41                                 | +                                        | 1.47                                          | 3.84E-10                                  | 3.31E-08                          |
| <b>regulation of cellular metabolic process (GO:0031323)</b>                        | 6187                                 | 230                               | 167.01                                 | +                                        | 1.38                                          | 2.71E-08                                  | 1.64E-06                          |
| <b>regulation of macromolecule metabolic process (GO:0060255)</b>                   | 6151                                 | 229                               | 166.04                                 | +                                        | 1.38                                          | 3.26E-08                                  | 1.94E-06                          |
| <b>regulation of nitrogen compound metabolic process (GO:0051171)</b>               | 5958                                 | 219                               | 160.83                                 | +                                        | 1.36                                          | 2.06E-07                                  | 1.06E-05                          |
| <b>regulation of primary metabolic process (GO:0080090)</b>                         | 6124                                 | 225                               | 165.31                                 | +                                        | 1.36                                          | 1.51E-07                                  | 8.01E-06                          |
| <b>localization (GO:0051179)</b>                                                    | 5436                                 | 196                               | 146.74                                 | +                                        | 1.34                                          | 6.26E-06                                  | 2.33E-04                          |
| <b>regulation of metabolic process (GO:0019222)</b>                                 | 6672                                 | 242                               | 180.1                                  | +                                        | 1.34                                          | 8.53E-08                                  | 4.66E-06                          |
| <b>regulation of biological process (GO:0050789)</b>                                | 11425                                | 407                               | 308.4                                  | +                                        | 1.32                                          | 6.18E-17                                  | 1.31E-14                          |
| <b>biological regulation (GO:0065007)</b>                                           | 12072                                | 428                               | 325.87                                 | +                                        | 1.31                                          | 1.46E-18                                  | 3.65E-16                          |
| <b>regulation of cellular process (GO:0050794)</b>                                  | 10764                                | 382                               | 290.56                                 | +                                        | 1.31                                          | 2.29E-14                                  | 3.55E-12                          |
| regulation of macromolecule biosynthetic process (GO:0010556)                       | 4221                                 | 146                               | 113.94                                 | +                                        | 1.28                                          | 1.23E-03                                  | 2.21E-02                          |
| <b>cellular process (GO:0009987)</b>                                                | 15084                                | 492                               | 407.17                                 | +                                        | 1.21                                          | 7.24E-17                                  | 1.50E-14                          |
| <b>biological_process (GO:0008150)</b>                                              | 17500                                | 542                               | 472.39                                 | +                                        | 1.15                                          | 8.11E-19                                  | 2.06E-16                          |
| detection of chemical stimulus involved in sensory perception of smell (GO:0050911) | 429                                  | 0                                 | 11.58                                  | -                                        | <0.01                                         | 2.05E-05                                  | 6.46E-04                          |

Continued

**Supplementary Table SVII Continued**

| <b>GO biological process complete</b>                                                             | <b>Homo sapiens<br/>- REFLIST<br/>(21042)</b> | <b>Client Text<br/>Box Input<br/>(568)</b> | <b>Client Text<br/>Box Input<br/>(expected)</b> | <b>Client Text<br/>Box Input<br/>(over/under)</b> | <b>Client Text<br/>Box Input (fold<br/>Enrichment)</b> | <b>Client Text<br/>Box Input (raw<br/>P-value)</b> | <b>Client Text<br/>Box Input<br/>(FDR)</b> |
|---------------------------------------------------------------------------------------------------|-----------------------------------------------|--------------------------------------------|-------------------------------------------------|---------------------------------------------------|--------------------------------------------------------|----------------------------------------------------|--------------------------------------------|
| mRNA splicing, via spliceosome (GO:0000398)                                                       | 285                                           | 0                                          | 7.69                                            | -                                                 | < 0.01                                                 | 1.06E-03                                           | 1.97E-02                                   |
| ribonucleoprotein complex biogenesis (GO:0022613)                                                 | 468                                           | 0                                          | 12.63                                           | -                                                 | < 0.01                                                 | 6.07E-06                                           | 2.26E-04                                   |
| ribosome biogenesis (GO:0042254)                                                                  | 334                                           | 0                                          | 9.02                                            | -                                                 | < 0.01                                                 | 2.10E-04                                           | 4.98E-03                                   |
| RNA splicing, via transesterification reactions (GO:0000375)                                      | 288                                           | 0                                          | 7.77                                            | -                                                 | < 0.01                                                 | 1.10E-03                                           | 2.02E-02                                   |
| RNA splicing, via transesterification reactions with bulged adenosine as nucleophile (GO:0000377) | 285                                           | 0                                          | 7.69                                            | -                                                 | < 0.01                                                 | 1.06E-03                                           | 1.96E-02                                   |
| rRNA processing (GO:0006364)                                                                      | 261                                           | 0                                          | 7.05                                            | -                                                 | < 0.01                                                 | 1.50E-03                                           | 2.58E-02                                   |
| sensory perception of smell (GO:0007608)                                                          | 458                                           | 0                                          | 12.36                                           | -                                                 | < 0.01                                                 | 9.32E-06                                           | 3.36E-04                                   |
| establishment of localization in cell (GO:0051649)                                                | 1494                                          | 22                                         | 40.33                                           | -                                                 | 0.55                                                   | 1.97E-03                                           | 3.23E-02                                   |
| intracellular transport (GO:0046907)                                                              | 1265                                          | 18                                         | 34.15                                           | -                                                 | 0.53                                                   | 2.90E-03                                           | 4.38E-02                                   |
| cellular macromolecular complex assembly (GO:0034622)                                             | 815                                           | 9                                          | 22                                              | -                                                 | 0.41                                                   | 2.59E-03                                           | 4.00E-02                                   |
| intracellular protein transport (GO:0006886)                                                      | 744                                           | 7                                          | 20.08                                           | -                                                 | 0.35                                                   | 1.53E-03                                           | 2.63E-02                                   |
| <b>RNA processing (GO:0006396)</b>                                                                | 897                                           | 7                                          | 24.21                                           | -                                                 | 0.29                                                   | 7.03E-05                                           | 1.93E-03                                   |
| Unclassified (UNCLASSIFIED)                                                                       | 3542                                          | 26                                         | 95.61                                           | -                                                 | 0.27                                                   | 8.11E-19                                           | 2.10E-16                                   |
| detection of chemical stimulus involved in sensory perception (GO:0050907)                        | 472                                           | 3                                          | 12.74                                           | -                                                 | 0.24                                                   | 3.18E-03                                           | 4.71E-02                                   |
| mRNA processing (GO:0006397)                                                                      | 465                                           | 3                                          | 12.55                                           | -                                                 | 0.24                                                   | 3.05E-03                                           | 4.55E-02                                   |
| mRNA metabolic process (GO:0016071)                                                               | 680                                           | 4                                          | 18.36                                           | -                                                 | 0.22                                                   | 1.30E-04                                           | 3.32E-03                                   |
| sensory perception of chemical stimulus (GO:0007606)                                              | 533                                           | 3                                          | 14.39                                           | -                                                 | 0.21                                                   | 8.35E-04                                           | 1.63E-02                                   |
| ncRNA processing (GO:0034470)                                                                     | 405                                           | 2                                          | 10.93                                           | -                                                 | 0.18                                                   | 2.55E-03                                           | 3.99E-02                                   |
| peptide biosynthetic process (GO:0043043)                                                         | 410                                           | 2                                          | 11.07                                           | -                                                 | 0.18                                                   | 2.61E-03                                           | 4.01E-02                                   |
| cilium assembly (GO:0060271)                                                                      | 328                                           | 1                                          | 8.85                                            | -                                                 | 0.11                                                   | 2.68E-03                                           | 4.11E-02                                   |
| cilium organization (GO:0044782)                                                                  | 341                                           | 1                                          | 9.2                                             | -                                                 | 0.11                                                   | 1.85E-03                                           | 3.08E-02                                   |
| translation (GO:0006412)                                                                          | 383                                           | 1                                          | 10.34                                           | -                                                 | 0.1                                                    | 9.56E-04                                           | 1.80E-02                                   |
