# Supplementary material for: Human induced pluripotent stem cells from two azoospermic patients with Klinefelter syndrome show similar X chromosome inactivation behavior to female pluripotent stem cells
Source: PubMed Central journal article supplement — Hum Reprod. 2019 Nov 19;34(11):2297–310. doi: 10.1093/humrep/dez134 (PMC6894010; doi:10.1093/humrep/dez134), 2019-11-19
Supplement: supp_t8_dez134.pdf [file supp_t8_dez134.pdf]

**Supplementary Table SVIII RNA fluorescence in-situ hybridization co.**

| Sample         | Total cells counted | No XIST cloud | One XIST cloud | Two XIST clouds | I ATRX |
|----------------|---------------------|---------------|----------------|-----------------|--------|
| <b>f-HM2</b>   | 257                 | 257           | 0              | 0               | -      |
| <b>f-KS1</b>   | 220                 | 9             | 190            | 17              | -      |
| <b>f-KS2</b>   | 334                 | 14            | 314            | 6               | -      |
| <b>f-HF1</b>   | 227                 | 8             | 215            | 4               | -      |
| <b>ips-HM1</b> | 552                 | 552           | 0              | 0               | 524    |
| <b>ips-HM2</b> | 464                 | 464           | 0              | 0               | 453    |
| <b>ips-KS1</b> | 1077                | 1025          | 52             | 1               | 1044   |
| <b>ips-KS2</b> | 886                 | 299           | 587            | 1               | 877    |
| <b>ips-HF1</b> | 1518                | 1424          | 94             | 9               | 1381   |
| <b>HS980</b>   | 1301                | 1294          | 7              | 0               | 1081   |
