# Supplementary material for: Human induced pluripotent stem cells from two azoospermic patients with Klinefelter syndrome show similar X chromosome inactivation behavior to female pluripotent stem cells
Source: PubMed Central journal article supplement — Hum Reprod. 2019 Nov 19;34(11):2297–310. doi: 10.1093/humrep/dez134 (PMC6894010; doi:10.1093/humrep/dez134), 2019-11-19
Supplement: supp_t10_dez134.pdf [file supp_t10_dez134.pdf]

**Supplementary Table SX Differentially expressed genes for ips-KS2 versus ips-HM1 and ips-HM2 hiPSCs.** (See also Fig. 5)

| Gene id         | Gene       | Locus                 | ips-KS2 vs ips-HM1    |                       |                       | ips-KS2 vs ips-HM2 |                       |                       |                       |          |
|-----------------|------------|-----------------------|-----------------------|-----------------------|-----------------------|--------------------|-----------------------|-----------------------|-----------------------|----------|
|                 |            |                       | Avg-value-<br>ips-KS2 | Avg-value-<br>ips-HM1 | log2<br>(fold_change) | p_value            | Avg-value-<br>ips-KS2 | Avg-value-<br>ips-HM2 | log2<br>(fold_change) | p_value  |
| ENSG0000060718  | COL11A1    | 1:103342022-103574052 | 8.92426               | 40.5486               | 2.18385               | 5.00E-05           | 9.63176               | 40.4575               | 2.07054               | 0.00015  |
| ENSG00000116774 | OLFM13     | 1:114522062-114524876 | 45.1998               | 71.3573               | 0.658746              | 0.00025            | 48.6791               | 82.3332               | 0.758173              | 0.00165  |
| ENSG00000120937 | NPPB       | 1:11917520-11918988   | 1.06852               | 20.3333               | 4.25016               | 5.00E-05           | 1.15037               | 33.3586               | 4.85789               | 5.00E-05 |
| ENSG00000143369 | ECM1       | 1:150480537-150486265 | 0.630046              | 3.11202               | 2.30432               | 5.00E-05           | 0.677995              | 4.21341               | 2.63564               | 5.00E-05 |
| ENSG00000197747 | S100A10    | 1:151955390-151966866 | 97.7438               | 259.227               | 1.40714               | 5.00E-05           | 105.345               | 201.073               | 0.932588              | 0.00035  |
| ENSG00000197956 | S100A6     | 1:153506078-153508720 | 18.1794               | 53.2273               | 1.54986               | 5.00E-05           | 19.5528               | 54.2509               | 1.47227               | 5.00E-05 |
| ENSG00000169418 | NPR1       | 1:153651112-153666468 | 4.02583               | 2.40595               | -0.742679             | 0.00205            | 4.3302                | 2.18806               | -0.984786             | 0.0047   |
| ENSG00000158710 | TAGLN2     | 1:159887896-159895522 | 48.8973               | 137.298               | 1.48949               | 5.00E-05           | 52.6316               | 107.271               | 1.02726               | 0.00015  |
| ENSG00000018625 | ATPIA2     | 1:160085548-160113381 | 17.0681               | 4.30029               | -1.9888               | 5.00E-05           | 18.3786               | 10.7186               | -0.777918             | 0.00685  |
| ENSG00000158874 | APOA2      | 1:161185023-161193421 | 0.100845              | 6.22822               | 5.94861               | 5.00E-05           | 0.108602              | 11.4842               | 6.72446               | 5.00E-05 |
| ENSG00000198821 | CD247      | 1:167399876-167487847 | 1.24022               | 0.485795              | -1.35218              | 0.0037             | 1.33515               | 0.488384              | -1.45092              | 0.00935  |
| ENSG00000117148 | ACTL8      | 1:18081807-18153558   | 1.07139               | 0.384188              | -1.4796               | 0.00045            | 1.15333               | 0.415317              | -1.47352              | 0.0068   |
| ENSG00000058085 | LAMC2      | 1:183155372-183214035 | 6.02489               | 16.473                | 1.4511                | 5.00E-05           | 6.49012               | 12.1264               | 0.901837              | 0.00095  |
| ENSG00000116852 | KIF21B     | 1:200938519-200992828 | 6.01131               | 3.57463               | -0.749884             | 0.0001             | 6.46736               | 3.80565               | -0.765033             | 0.00255  |
| ENSG00000159176 | CSRPI      | 1:201452657-201502736 | 23.5769               | 66.4044               | 1.4939                | 5.00E-05           | 25.3853               | 56.4219               | 1.15226               | 0.00035  |
| ENSG00000159388 | BTG2       | 1:203274618-203278730 | 1.48268               | 6.76861               | 2.19066               | 5.00E-05           | 1.59753               | 6.30856               | 1.98147               | 5.00E-05 |
| ENSG00000122176 | FMOD       | 1:203309755-203320617 | 0.38106               | 2.94385               | 2.94961               | 5.00E-05           | 0.410518              | 2.7989                | 2.76934               | 5.00E-05 |
| ENSG00000054392 | HHA1       | 1:210501595-210849638 | 0.402556              | 1.04673               | 1.37863               | 0.00035            | 0.433861              | 1.33142               | 1.61766               | 0.00315  |
| ENSG00000198468 | FLVCR1-AS1 | 1:213025449-213031430 | 16.2743               | 9.51074               | -0.774964             | 0.00195            | 17.5214               | 7.81227               | -1.16531              | 0.001    |

Continued

Supplementary Table SX Continued

| Gene id         | Gene          | Locus                  | ips-KS2 vs ips-HMI |                   |                    | ips-KS2 vs ips-HM2 |                   |                   |                    |          |
|-----------------|---------------|------------------------|--------------------|-------------------|--------------------|--------------------|-------------------|-------------------|--------------------|----------|
|                 |               |                        | Avg-value-ips-KS2  | Avg-value-ips-HMI | log2 (fold_change) | p_value            | Avg-value-ips-KS2 | Avg-value-ips-HM2 | log2 (fold_change) | p_value  |
| ENSG00000092969 | TGFB2         | 1:218519576-218617961  | 1.06744            | 2.83351           | 1.40843            | 0.00455            | 1.15037           | 8.91642           | 2.95437            | 5.00E-05 |
| ENSG00000185155 | MIXL1         | 1:226411318-226414755  | 0.93336            | 2.07354           | 1.15159            | 0.0046             | 1.0051            | 3.28279           | 1.70758            | 0.0024   |
| ENSG00000143632 | ACTA1         | 1:229566991-229569845  | 0.698284           | 26.5172           | 5.24697            | 5.00E-05           | 0.750682          | 12.9618           | 4.10992            | 5.00E-05 |
| ENSG00000182118 | FAM89A        | 1:231154703-231175992  | 1.05942            | 3.48549           | 1.71809            | 5.00E-05           | 1.14064           | 4.08612           | 1.84088            | 0.00015  |
| ENSG00000116991 | SIPA1L2       | 1:232533710-232697304  | 3.19499            | 10.1715           | 1.67065            | 5.00E-05           | 3.44106           | 6.98697           | 1.02181            | 0.00075  |
| ENSG00000168243 | GNG4          | 1:235710986-235814054  | 39.4184            | 19.5531           | -1.01147           | 5.00E-05           | 42.4863           | 22.0116           | -0.948735          | 0.0013   |
| ENSG00000084628 | NKAIN1        | 1:31652591-31712401    | 27.1967            | 15.5674           | -0.804907          | 0.0001             | 29.2794           | 16.7354           | -0.806984          | 0.00095  |
| ENSG00000117394 | SLC2A1        | 1:43391051-43424530    | 89.3404            | 226.854           | 1.34438            | 5.00E-05           | 96.1866           | 181.939           | 0.919552           | 5.00E-05 |
| ENSG00000222009 | BTBD19        | 1:45274153-45281257    | 0.404668           | 1.21176           | 1.58229            | 0.00035            | 0.435095          | 1.53707           | 1.82078            | 0.00055  |
| ENSG00000169174 | PCSK9         | 1:55505220-55530525    | 4.57223            | 47.8292           | 3.38692            | 5.00E-05           | 4.91775           | 17.2022           | 1.80653            | 5.00E-05 |
| ENSG00000177606 | JUN           | 1:59246464-59249785    | 1.48359            | 5.25177           | 1.82371            | 5.00E-05           | 1.59607           | 3.61748           | 1.18046            | 0.0018   |
| ENSG00000158966 | CACHD1        | 1:64936427-65158741    | 31.1901            | 17.6328           | -0.822827          | 5.00E-05           | 33.6156           | 21.9401           | -0.615558          | 0.0077   |
| ENSG00000116717 | GADD45A       | 1:68150743-68154021    | 3.98144            | 10.797            | 1.43927            | 5.00E-05           | 4.2839            | 9.01421           | 1.07328            | 0.0039   |
| ENSG00000237491 | RPI1-206L10.9 | 1:714149-755214        | 0.548254           | 1.25787           | 1.19807            | 0.0038             | 0.591205          | 1.76753           | 1.58               | 0.00145  |
| ENSG00000162618 | ELTD1         | 1:79355448-79472403    | 0.776149           | 2.27485           | 1.55136            | 5.00E-05           | 0.837944          | 4.36559           | 2.38125            | 5.00E-05 |
| ENSG00000137962 | ARHGAP29      | 1:94614543-94740624    | 1.17221            | 3.18132           | 1.44039            | 5.00E-05           | 1.26526           | 2.88027           | 1.18677            | 0.0006   |
| ENSG00000117525 | F3            | 1:94994780-95007356    | 3.77776            | 18.576            | 2.29784            | 5.00E-05           | 4.07274           | 8.87339           | 1.12348            | 0.00145  |
| ENSG00000138131 | LOXL4         | 10:100007446-100028007 | 0.161513           | 1.15862           | 2.84269            | 5.00E-05           | 0.173815          | 1.74094           | 3.32424            | 5.00E-05 |
| ENSG00000107819 | SFXN3         | 10:102790990-102800998 | 1.21108            | 2.63134           | 1.1195             | 0.00225            | 1.3043            | 4.02379           | 1.62528            | 0.00055  |

Continued

Supplementary Table SX Continued

| Gene id         | Gene          | Locus                  | ips-KS2 vs iPS-HMI    |                       |                       | ips-KS2 vs ips-HM2 |                       |                       |                       |          |
|-----------------|---------------|------------------------|-----------------------|-----------------------|-----------------------|--------------------|-----------------------|-----------------------|-----------------------|----------|
|                 |               |                        | Avg-value-<br>ips-KS2 | Avg-value-<br>iPS-HMI | log2<br>(fold_change) | p_value            | Avg-value-<br>ips-KS2 | Avg-value-<br>ips-HM2 | log2<br>(fold_change) | p_value  |
| ENSG00000225383 | SFTA1P        | 10:10826399-10836943   | 1.10873               | 11.7887               | 3.41043               | 5.00E-05           | 1.19484               | 12.9267               | 3.43547               | 5.00E-05 |
| ENSG00000026025 | VIM           | 10:17256237-17279592   | 92.5775               | 480.914               | 2.37704               | 5.00E-05           | 99.6618               | 572.149               | 2.52128               | 5.00E-05 |
| ENSG00000078114 | NIEBL         | 10:21068901-21463977   | 3.89835               | 8.28584               | 1.08779               | 5.00E-05           | 4.20237               | 9.71374               | 1.20882               | 0.00015  |
| ENSG00000273038 | RPI1-479G22.8 | 10:33176188-33178239   | 0.411725              | 1.98938               | 2.27257               | 5.00E-05           | 0.443701              | 1.77917               | 2.00355               | 0.0004   |
| ENSG00000099250 | NRPI          | 10:33466419-33625190   | 1.67292               | 5.05507               | 1.59536               | 5.00E-05           | 1.80228               | 3.91782               | 1.12023               | 0.00645  |
| ENSG00000067082 | KLF6          | 10:3818187-3827473     | 6.2736                | 10.3133               | 0.717145              | 0.00275            | 6.76228               | 13.6662               | 1.01503               | 0.00025  |
| ENSG00000204175 | GPRIN2        | 10:46994086-47005643   | 6.53936               | 1.94106               | -1.75231              | 5.00E-05           | 7.03543               | 3.27162               | -1.10463              | 0.0071   |
| ENSG00000107984 | DKK1          | 10:54074055-54077802   | 1.30969               | 4.86422               | 1.89298               | 0.0005             | 1.41284               | 6.08177               | 2.10589               | 0.0017   |
| ENSG00000223784 | RPI1-554I8.2  | 10:6779343-6780988     | 0.987883              | 6.40537               | 2.69687               | 5.00E-05           | 1.06359               | 4.11608               | 1.95233               | 0.0011   |
| ENSG00000165730 | STOX1         | 10:70587297-70655188   | 3.04578               | 0.689162              | -2.1439               | 5.00E-05           | 3.28344               | 1.44359               | -1.18554              | 0.00135  |
| ENSG00000122861 | PLAU          | 10:75668934-75682535   | 10.1869               | 26.1417               | 1.35963               | 5.00E-05           | 10.9708               | 40.0426               | 1.86786               | 5.00E-05 |
| ENSG00000148600 | CDHRI         | 10:85954409-85979377   | 1.26709               | 2.23877               | 0.821187              | 0.00245            | 1.36477               | 2.6815                | 0.974389              | 0.00765  |
| ENSG00000107796 | ACTA2         | 10:90639490-90775542   | 3.88263               | 16.9068               | 2.12249               | 5.00E-05           | 4.18104               | 36.8069               | 3.13804               | 5.00E-05 |
| ENSG00000138135 | CH25H         | 10:90965693-90967071   | 0.421172              | 2.63843               | 2.6472                | 5.00E-05           | 0.453666              | 2.09244               | 2.20548               | 0.00035  |
| ENSG00000148677 | ANKRD1        | 10:92671852-92681033   | 3.5478                | 24.7336               | 2.80148               | 5.00E-05           | 3.82233               | 36.1                  | 3.23948               | 5.00E-05 |
| ENSG00000095596 | CYP26A1       | 10:94833231-94837647   | 1.60393               | 16.3282               | 3.34769               | 5.00E-05           | 1.72716               | 11.8781               | 2.78183               | 5.00E-05 |
| ENSG00000138119 | MYOF          | 10:95066185-95242074   | 1.02731               | 5.71053               | 2.47475               | 5.00E-05           | 1.10681               | 7.4921                | 2.75896               | 5.00E-05 |
| ENSG00000137672 | TRPC6         | 11:101322294-101743293 | 0.369102              | 2.38875               | 2.69416               | 5.00E-05           | 0.39787               | 1.10861               | 1.47838               | 0.0051   |
| ENSG00000152578 | GRIA4         | 11:105480720-105852819 | 8.16929               | 3.5298                | -1.21063              | 0.0001             | 8.80344               | 3.45018               | -1.3514               | 0.0001   |

Continued

Supplementary Table SX Continued

| Gene id         | Gene    | Locus                  | ips-KS2 vs ips-HMI |                   |                    | ips-KS2 vs ips-HM2 |                   |                   |                    |
|-----------------|---------|------------------------|--------------------|-------------------|--------------------|--------------------|-------------------|-------------------|--------------------|
|                 |         |                        | Avg-value-ips-KS2  | Avg-value-ips-HMI | log2 (fold_change) | p_value            | Avg-value-ips-KS2 | Avg-value-ips-HM2 | log2 (fold_change) |
| ENSG00000166741 | NINMT   | 11:113930314-114227293 | 0.147211           | 4.28647           | 4.86383            | 5.00E-05           | 4.37782           | 4.78679           | 5.00E-05           |
| ENSG00000182985 | CADMI   | 11:115039937-115375675 | 8.74082            | 24.1417           | 1.46569            | 5.00E-05           | 20.3444           | 1.11031           | 5.00E-05           |
| ENSG00000149591 | TAGLN   | 11:117070036-117103241 | 127.919            | 606.155           | 2.24445            | 5.00E-05           | 137.672           | 1.90778           | 0.0001             |
| ENSG00000076706 | MCAM    | 11:119179240-119192231 | 9.95565            | 30.806            | 1.62962            | 5.00E-05           | 10.716            | 0.728875          | 0.00655            |
| ENSG00000133816 | MICAL2  | 11:12115542-12285334   | 1.96154            | 3.80378           | 0.955449           | 0.00155            | 2.11298           | 1.19404           | 0.00055            |
| ENSG00000149564 | ESAM    | 11:124617367-124635832 | 0.240631           | 1.54313           | 2.68097            | 5.00E-05           | 0.259319          | 1.65724           | 0.00015            |
| ENSG00000134917 | ADAMTS8 | 11:130274819-130298888 | 4.55681            | 2.54454           | -0.840618          | 0.0015             | 4.90594           | 2.51957           | 0.00495            |
| ENSG00000130600 | H19     | 11:2016405-2022700     | 6.06817            | 34.2512           | 2.49682            | 5.00E-05           | 6.53077           | 1.97067           | 0.0007             |
| ENSG00000167244 | IGF2    | 11:2150341-2182571     | 0.333179           | 3.74399           | 3.49021            | 5.00E-05           | 0.358603          | 2.60111           | 5.00E-05           |
| ENSG00000026508 | CD44    | 11:35160416-35253949   | 4.67741            | 17.4596           | 1.90024            | 5.00E-05           | 5.03834           | 1.17045           | 0.0007             |
| ENSG00000132274 | TRIM22  | 11:5684424-5959849     | 11.9283            | 43.5681           | 1.86888            | 5.00E-05           | 12.8587           | 0.99774           | 0.00545            |
| ENSG00000134817 | APLN    | 11:57001050-57004709   | 0.306738           | 2.88365           | 3.23282            | 5.00E-05           | 0.33028           | 3.91747           | 5.00E-05           |
| ENSG00000124942 | AHNAK   | 11:62201015-62323707   | 0.732565           | 4.84534           | 2.72557            | 5.00E-05           | 0.789279          | 2.66231           | 5.00E-05           |
| ENSG00000168004 | HRASL5  | 11:63228875-63258666   | 2.06014            | 6.52616           | 1.66349            | 5.00E-05           | 2.22122           | 1.18475           | 0.00215            |
| ENSG00000166311 | SMPD1   | 11:6411654-6416228     | 1.21468            | 2.54467           | 1.0669             | 0.0007             | 1.30769           | 1.39041           | 0.00115            |
| ENSG00000175592 | FOSL1   | 11:65659519-65668044   | 1.46262            | 7.08403           | 2.27601            | 5.00E-05           | 1.57378           | 1.32585           | 0.00355            |
| ENSG00000174080 | CTSF    | 11:66330933-66336312   | 5.87063            | 10.1864           | 0.79506            | 0.0009             | 6.31896           | 0.812654          | 0.00795            |
| ENSG00000137501 | SYTL2   | 11:85405266-85522184   | 3.63619            | 8.51653           | 1.22784            | 0.0001             | 3.92177           | 1.26205           | 0.0014             |
| ENSG00000150687 | PRSS23  | 11:86502100-86664433   | 8.78236            | 39.9066           | 2.18395            | 5.00E-05           | 9.45549           | 2.71843           | 5.00E-05           |

Continued

Supplementary Table SX Continued

| Gene id         | Gene         | Locus                  | ips-KS2 vs ips-HM1    |                       |                       | ips-KS2 vs ips-HM2 |                       |                       |                       |          |
|-----------------|--------------|------------------------|-----------------------|-----------------------|-----------------------|--------------------|-----------------------|-----------------------|-----------------------|----------|
|                 |              |                        | Avg-value-<br>ips-KS2 | Avg-value-<br>ips-HM1 | log2<br>(fold_change) | p_value            | Avg-value-<br>ips-KS2 | Avg-value-<br>ips-HM2 | log2<br>(fold_change) | p_value  |
| ENSG00000086991 | NOX4         | 11:89057523-89322779   | 1.68029               | 3.26191               | 0.957009              | 0.00235            | 1.81146               | 5.09588               | 1.49218               | 0.00135  |
| ENSG00000151572 | ANO4         | 12:10111303-101522419  | 2.19531               | 3.82644               | 0.801577              | 0.0053             | 2.36645               | 5.99987               | 1.34221               | 0.0019   |
| ENSG00000136048 | DRAM1        | 12:102271128-102405908 | 2.32591               | 8.94133               | 1.94269               | 5.00E-05           | 2.50687               | 5.10743               | 1.02671               | 0.00295  |
| ENSG00000135127 | CCDC64       | 12:120427672-120532298 | 13.6983               | 7.61609               | -0.846874             | 0.0007             | 14.736                | 7.4707                | -0.980028             | 0.00155  |
| ENSG00000151952 | TMEM132D     | 12:129556269-130388211 | 2.51582               | 1.17634               | -1.09672              | 5.00E-05           | 2.70893               | 0                     | -inf                  | 5.00E-05 |
| ENSG00000134531 | EMPI         | 12:13349649-13369708   | 0.77725               | 3.41658               | 2.1361                | 5.00E-05           | 0.838178              | 1.98764               | 1.24573               | 0.0092   |
| ENSG00000111348 | ARHGDI3      | 12:15094950-15114662   | 0.820047              | 4.37259               | 2.41471               | 5.00E-05           | 0.8835                | 2.60509               | 1.56003               | 0.00515  |
| ENSG00000110900 | TSPAN11      | 12:31079361-31149534   | 0.592444              | 1.43579               | 1.27709               | 0.0019             | 0.637785              | 1.53088               | 1.26321               | 0.00795  |
| ENSG00000139174 | PRICKLE1     | 12:42632248-42984157   | 27.8327               | 10.6709               | -1.3831               | 0.0003             | 29.9862               | 10.0545               | -1.57646              | 0.00375  |
| ENSG00000198001 | IRAK4        | 12:44152746-44183346   | 1.77929               | 3.73697               | 1.07057               | 0.00055            | 1.91921               | 3.81064               | 0.98952               | 0.0067   |
| ENSG00000139209 | SLC38A4      | 12:47158545-47226191   | 15.7233               | 7.36918               | -1.09333              | 0.0001             | 16.9635               | 9.45488               | -0.843304             | 0.00375  |
| ENSG00000139211 | AMIGO2       | 12:47469489-47630443   | 2.32615               | 5.82502               | 1.32432               | 5.00E-05           | 2.50775               | 7.73158               | 1.62437               | 0.00015  |
| ENSG00000166863 | TAC3         | 12:57403783-57444982   | 17.7249               | 5.07483               | -1.80434              | 5.00E-05           | 19.0838               | 10.1054               | -0.917227             | 0.0091   |
| ENSG00000174099 | MSRB3        | 12:65672422-66036152   | 0.419109              | 1.8637                | 2.15277               | 5.00E-05           | 0.451902              | 2.34508               | 2.37555               | 5.00E-05 |
| ENSG00000135678 | CPM1         | 12:69201955-69365350   | 0.205889              | 1.1378                | 2.46631               | 0.0032             | 0.222023              | 2.14722               | 3.27369               | 0.00465  |
| ENSG00000139292 | LGR5         | 12:71518864-71980090   | 0.224052              | 1.20187               | 2.42337               | 5.00E-05           | 0.241803              | 1.71118               | 2.82308               | 5.00E-05 |
| ENSG00000173262 | SLC2A14      | 12:7965107-8043744     | 4.36168               | 13.3065               | 1.60918               | 5.00E-05           | 4.70032               | 8.50407               | 0.855396              | 0.00345  |
| ENSG00000257474 | RPI1-359M6.1 | 12:79933982-79944315   | 2.59435               | 151.973               | 5.8723                | 5.00E-05           | 2.79467               | 7.86481               | 1.49273               | 0.0034   |
| ENSG00000059804 | SLC2A3       | 12:8071825-8088871     | 104.927               | 303.096               | 1.53038               | 5.00E-05           | 113.088               | 263.946               | 1.22279               | 5.00E-05 |

Continued

Supplementary Table SX Continued

| Gene id         | Gene         | Locus                  | ips-KS2 vs ips-HMI |                   |                    | ips-KS2 vs ips-HM2 |                   |                   |                    |          |
|-----------------|--------------|------------------------|--------------------|-------------------|--------------------|--------------------|-------------------|-------------------|--------------------|----------|
|                 |              |                        | Avg-value-ips-KS2  | Avg-value-ips-HMI | log2 (fold_change) | p_value            | Avg-value-ips-KS2 | Avg-value-ips-HM2 | log2 (fold_change) | p_value  |
| ENSG00000197614 | MFPAP5       | 12:8786962-8815484     | 1.15938            | 5.46878           | 2.23786            | 5.00E-05           | 1.24973           | 9.99877           | 3.00014            | 5.00E-05 |
| ENSG00000111788 | RPI1-22B23.1 | 12:9429830-9466684     | 5.83171            | 3.08068           | -0.920668          | 0.00015            | 6.27482           | 3.37706           | -0.893805          | 0.0045   |
| ENSG00000214826 | DDX12P       | 12:9570308-9600825     | 7.26536            | 4.82477           | -0.590573          | 0.00495            | 7.81746           | 4.25459           | -0.877681          | 0.0031   |
| ENSG00000074527 | NTN4         | 12:96043030-96184930   | 0.358303           | 3.05041           | 3.08975            | 5.00E-05           | 0.386034          | 2.26763           | 2.55439            | 0.001    |
| ENSG00000127863 | TNFRSF19     | 13:24144508-24250232   | 0.822199           | 2.64166           | 1.68388            | 5.00E-05           | 0.886341          | 3.88723           | 2.13281            | 5.00E-05 |
| ENSG00000151846 | PABPC3       | 13:25670299-25673389   | 0.450051           | 1.00587           | 1.16028            | 0.0011             | 0.4855            | 1.32203           | 1.44521            | 0.00185  |
| ENSG00000120669 | SOHLH2       | 13:36742344-36871979   | 5.45222            | 0.570681          | -3.25609           | 0.00115            | 5.87805           | 0.935653          | -2.65129           | 0.0041   |
| ENSG00000136167 | LCPI         | 13:46700054-46786006   | 2.043              | 8.12548           | 1.99176            | 5.00E-05           | 2.20331           | 5.44126           | 1.30427            | 0.0003   |
| ENSG00000226792 | LINC00371    | 13:51656983-51746524   | 13.1398            | 4.60878           | -1.51148           | 5.00E-05           | 14.1522           | 7.98507           | -0.825651          | 0.00595  |
| ENSG00000150510 | FAM124A      | 13:51796502-51858377   | 22.7719            | 9.42807           | -1.27222           | 5.00E-05           | 24.5261           | 13.577            | -0.853153          | 0.00015  |
| ENSG00000136110 | LECT1        | 13:53277398-53313947   | 121.705            | 76.9539           | -0.661319          | 0.00035            | 131.108           | 85.0916           | -0.623668          | 0.0063   |
| ENSG00000102554 | KLF5         | 13:73629113-73651676   | 1.04788            | 3.64178           | 1.79717            | 5.00E-05           | 1.12891           | 2.63073           | 1.22054            | 0.0055   |
| ENSG00000066735 | KIF26A       | 14:104605059-104647231 | 5.09512            | 3.11393           | -0.710378          | 0.00105            | 5.47706           | 2.51103           | -1.12512           | 0.0003   |
| ENSG00000258986 | TMEM179      | 14:104941014-105071984 | 2.66738            | 0.540024          | -2.30432           | 5.00E-05           | 2.86931           | 0.6707            | -2.09697           | 0.0015   |
| ENSG00000185567 | AHNAK2       | 14:105403580-105444694 | 0.534254           | 1.23019           | 1.20329            | 0.0038             | 0.575459          | 2.02218           | 1.81313            | 0.0006   |
| ENSG00000185347 | C14orf80     | 14:105952653-105965912 | 2.11384            | 0.946464          | -1.15925           | 0.0095             | 2.27299           | 0.819432          | -1.4719            | 0.00615  |
| ENSG00000225210 | AL589743.1   | 14:19650017-19718563   | 1.62605            | 0                 | -inf               | 5.00E-05           | 1.75293           | 0                 | -inf               | 5.00E-05 |
| ENSG00000129538 | RNASEI       | 14:21269386-21271437   | 0.379757           | 1.02367           | 1.43061            | 0.002              | 0.408859          | 2.29672           | 2.4899             | 5.00E-05 |
| ENSG00000139926 | FRMD6        | 14:51921229-52197445   | 5.26837            | 10.9668           | 1.05772            | 5.00E-05           | 5.67992           | 11.0284           | 0.95728            | 0.00055  |

Continued

Supplementary Table SX Continued

| Gene id         | Gene    | Locus                      | ips-KS2 vs ips-HMI    |                       |                       | ips-KS2 vs ips-HM2 |                       |                       |                       |          |
|-----------------|---------|----------------------------|-----------------------|-----------------------|-----------------------|--------------------|-----------------------|-----------------------|-----------------------|----------|
|                 |         |                            | Avg-value-<br>ips-KS2 | Avg-value-<br>ips-HMI | log2<br>(fold_change) | p_value            | Avg-value-<br>ips-KS2 | Avg-value-<br>ips-HM2 | log2<br>(fold_change) | p_value  |
| ENSG00000202577 | SAMD4A  | 14:55033814-<br>55260033   | 1.63947               | 7.93289               | 2.27461               | 5.00E-05           | 1.76637               | 4.61219               | 1.38467               | 5.00E-05 |
| ENSG00000165617 | DACT1   | 14:59100684-<br>59115039   | 2.23466               | 19.099                | 3.09537               | 5.00E-05           | 2.40674               | 10.3533               | 2.10495               | 5.00E-05 |
| ENSG00000119681 | LTBP2   | 14:74964872-<br>75079306   | 0.243083              | 1.66161               | 2.77306               | 5.00E-05           | 0.261705              | 3.14304               | 3.58615               | 5.00E-05 |
| ENSG00000185070 | FLRT2   | 14:85996487-<br>86095034   | 1.74134               | 4.6493                | 1.41682               | 0.0076             | 1.87763               | 6.29691               | 1.74573               | 0.0025   |
| ENSG00000100604 | CHGA    | 14:93389424-<br>93401638   | 12.7273               | 3.65918               | -1.79834              | 5.00E-05           | 13.693                | 7.98508               | -0.778064             | 0.0083   |
| ENSG00000184254 | ALDH1A3 | 15:101389765-<br>101626271 | 1.74181               | 10.8705               | 2.64176               | 5.00E-05           | 1.8767                | 7.91727               | 2.07681               | 5.00E-05 |
| ENSG00000166923 | GREM1   | 15:33009470-<br>33026870   | 2.88125               | 11.4599               | 1.99183               | 5.00E-05           | 3.10618               | 34.5146               | 3.47399               | 5.00E-05 |
| ENSG00000159251 | ACTC1   | 15:35047284-<br>35105124   | 17.0938               | 181.601               | 3.40923               | 5.00E-05           | 18.4211               | 131.306               | 2.8335                | 5.00E-05 |
| ENSG00000134138 | MEIS2   | 15:37181405-<br>37393504   | 0.389764              | 1.33555               | 1.77676               | 5.00E-05           | 0.420651              | 2.16204               | 2.3617                | 5.00E-05 |
| ENSG00000137801 | THBS1   | 15:39873279-<br>39891667   | 7.24708               | 25.2028               | 1.79811               | 5.00E-05           | 7.80844               | 14.6504               | 0.907831              | 0.0009   |
| ENSG00000171766 | GATM    | 15:45653321-<br>45694525   | 5.42013               | 12.9936               | 1.2614                | 5.00E-05           | 5.84218               | 16.9444               | 1.53623               | 5.00E-05 |
| ENSG00000166147 | FBN1    | 15:48700502-<br>48938046   | 2.37888               | 7.51923               | 1.6603                | 5.00E-05           | 2.5637                | 7.85299               | 1.61501               | 5.00E-05 |
| ENSG00000255302 | EID1    | 15:49115931-<br>49255641   | 121.963               | 72.5008               | -0.750379             | 0.00015            | 131.614               | 84.6898               | -0.636053             | 0.00985  |
| ENSG00000104112 | SCG3    | 15:51973549-<br>52013223   | 39.8971               | 22.3001               | -0.839235             | 5.00E-05           | 43.0586               | 20.1778               | -1.09353              | 5.00E-05 |
| ENSG00000166450 | PRTG    | 15:55903743-<br>56035288   | 2.81066               | 5.96527               | 1.08568               | 5.00E-05           | 3.03351               | 6.58593               | 1.1184                | 0.00025  |
| ENSG00000182718 | ANXA2   | 15:60639332-<br>60695082   | 128.444               | 379.195               | 1.5618                | 5.00E-05           | 138.391               | 319.269               | 1.20602               | 5.00E-05 |
| ENSG00000140416 | TPM1    | 15:63334830-<br>63364114   | 259.135               | 579.097               | 1.1601                | 5.00E-05           | 279.175               | 475.121               | 0.767124              | 0.00155  |
| ENSG00000166938 | DIS3L   | 15:66570835-<br>66626236   | 19.3687               | 7.68704               | -1.33323              | 5.00E-05           | 20.8744               | 8.3202                | -1.32704              | 5.00E-05 |
| ENSG00000137809 | ITGA11  | 15:68594049-<br>68724501   | 0.300471              | 2.55484               | 3.08793               | 5.00E-05           | 0.323315              | 5.29746               | 4.03429               | 5.00E-05 |

Continued

Supplementary Table SX Continued

| Gene id         | Gene         | Locus                | ips-KS2 vs ips-HMI |                   |                    | ips-KS2 vs ips-HM2 |                   |                   |                    |          |
|-----------------|--------------|----------------------|--------------------|-------------------|--------------------|--------------------|-------------------|-------------------|--------------------|----------|
|                 |              |                      | Avg-value-ips-KS2  | Avg-value-ips-HMI | log2 (fold_change) | p_value            | Avg-value-ips-KS2 | Avg-value-ips-HM2 | log2 (fold_change) | p_value  |
| ENSG00000166825 | ANPEP        | 15:90328119-90358633 | 1.13476            | 2.23621           | 0.978664           | 0.00465            | 1.221             | 2.72714           | 1.15933            | 0.0023   |
| ENSG00000188897 | CTD-3088G3.8 | 16:11453701-11617444 | 1.58501            | 0.198465          | -2.99754           | 5.00E-05           | 1.70505           | 0.747092          | -1.19046           | 0.00915  |
| ENSG00000183793 | NPIPA5       | 16:15457515-15474904 | 14.542             | 2.92148           | -2.31545           | 5.00E-05           | 15.6727           | 5.1557            | -1.60402           | 5.00E-05 |
| ENSG00000261740 | RPI1-345J4.5 | 16:29262828-29519817 | 15.1424            | 8.04587           | -0.912277          | 0.00615            | 16.3182           | 6.39898           | -1.35057           | 0.00325  |
| ENSG00000008517 | IL32         | 16:3115297-3137101   | 1.19287            | 6.13452           | 2.36252            | 5.00E-05           | 1.28524           | 7.17855           | 2.48166            | 5.00E-05 |
| ENSG00000087245 | MMP2         | 16:55423611-55540603 | 28.0658            | 61.7633           | 1.13794            | 5.00E-05           | 30.2121           | 66.2704           | 1.13324            | 0.00225  |
| ENSG00000198848 | CESI         | 16:55836762-55867249 | 0.289253           | 2.73912           | 3.24331            | 5.00E-05           | 0.311517          | 6.36859           | 4.35359            | 5.00E-05 |
| ENSG00000169715 | MT1E         | 16:56659386-56661024 | 9.57423            | 51.3598           | 2.42341            | 5.00E-05           | 10.2944           | 43.2831           | 2.07195            | 5.00E-05 |
| ENSG00000150394 | CDH8         | 16:61681145-62070939 | 2.70054            | 5.21104           | 0.948322           | 0.00755            | 2.90978           | 6.2526            | 1.10355            | 0.00455  |
| ENSG00000140937 | CDH11        | 16:64977655-65160015 | 2.74874            | 8.75711           | 1.67168            | 5.00E-05           | 2.96027           | 8.49875           | 1.52152            | 5.00E-05 |
| ENSG00000260834 | RPI1-256I9.2 | 16:65224875-65610203 | 36.8779            | 107.291           | 1.54071            | 5.00E-05           | 39.7271           | 96.6405           | 1.28251            | 5.00E-05 |
| ENSG00000159593 | NAEI         | 16:66836777-66907159 | 124.664            | 80.1153           | -0.637894          | 0.0002             | 134.461           | 85.5506           | -0.652337          | 0.0031   |
| ENSG00000039523 | FAM165A      | 16:67552320-67580691 | 0.921935           | 4.26204           | 2.20881            | 5.00E-05           | 0.991854          | 3.23439           | 1.7053             | 5.00E-05 |
| ENSG00000140945 | CDH13        | 16:82660407-83841439 | 1.11362            | 14.8425           | 3.73641            | 5.00E-05           | 1.19958           | 8.55862           | 2.83485            | 5.00E-05 |
| ENSG00000015413 | DPEP1        | 16:89679715-89704839 | 2.28501            | 0.823903          | -1.47166           | 0.0008             | 2.45832           | 0.983146          | -1.32219           | 0.00335  |
| ENSG00000109099 | PMP22        | 17:15133094-15169024 | 0.899715           | 9.7167            | 3.43293            | 5.00E-05           | 0.969837          | 4.59761           | 2.24507            | 5.00E-05 |
| ENSG00000132386 | SERPINF1     | 17:1665252-1680868   | 29.5205            | 11.8192           | -1.32058           | 5.00E-05           | 31.7911           | 17.464            | -0.864239          | 0.0055   |
| ENSG00000263563 | UBBP4        | 17:21729600-21731762 | 1.46557            | 0.425358          | -1.78471           | 0.0004             | 1.5781            | 0.358002          | -2.14015           | 0.00015  |
| ENSG00000132130 | LHX1         | 17:35294083-35301917 | 0.118961           | 1.34598           | 3.5001             | 5.00E-05           | 0.127975          | 2.2957            | 4.16499            | 5.00E-05 |

Continued



Supplementary Table SX Continued

| Gene id         | Gene         | Locus                | ips-KS2 vs ips-HMI    |                       |                       | ips-KS2 vs ips-HM2 |                       |                       |                       |          |
|-----------------|--------------|----------------------|-----------------------|-----------------------|-----------------------|--------------------|-----------------------|-----------------------|-----------------------|----------|
|                 |              |                      | Avg-value-<br>ips-KS2 | Avg-value-<br>ips-HMI | log2<br>(fold_change) | p_value            | Avg-value-<br>ips-KS2 | Avg-value-<br>ips-HM2 | log2<br>(fold_change) | p_value  |
| ENSG00000263874 | LINC00672    | 17:37081420-37084310 | 2.41814               | 0.35672               | -2.76103              | 5.00E-05           | 2.60631               | 1.08965               | -1.25815              | 0.00445  |
| ENSG00000238083 | LRRC37A2     | 17:44588876-44657088 | 1.62899               | 0.777928              | -1.06627              | 0.00725            | 1.75568               | 0.604168              | -1.53901              | 0.00405  |
| ENSG0000005884  | ITGA3        | 17:48133331-48167845 | 7.65982               | 16.4679               | 1.10428               | 0.0001             | 8.24425               | 14.5022               | 0.814808              | 0.00985  |
| ENSG00000108821 | COL1A1       | 17:48260649-48278993 | 27.0825               | 70.8443               | 1.38729               | 5.00E-05           | 29.157                | 81.7164               | 1.48679               | 5.00E-05 |
| ENSG00000261040 | CTD-231912.1 | 17:58156669-58169246 | 1.11965               | 5.63151               | 2.33048               | 5.00E-05           | 1.20624               | 6.93958               | 2.52433               | 0.0007   |
| ENSG00000181031 | RPH3AL       | 17:62292-236045      | 2.11877               | 0.586255              | -1.85363              | 5.00E-05           | 2.28002               | 1.07455               | -1.08531              | 0.00355  |
| ENSG00000204347 | BTBD17       | 17:72325254-72358085 | 1.65153               | 0.788022              | -1.0675               | 0.0082             | 1.77241               | 0.525524              | -1.75389              | 0.0013   |
| ENSG00000167874 | TMEM88       | 17:7758382-7759417   | 1.11316               | 6.2254                | 2.48351               | 5.00E-05           | 1.1978                | 6.93292               | 2.53308               | 0.0001   |
| ENSG00000171246 | NPTX1        | 17:78440947-78451643 | 59.1957               | 0.559245              | -6.72587              | 5.00E-05           | 63.7499               | 32.2662               | -0.982398             | 0.0011   |
| ENSG00000265766 | CXADRP3      | 18:14477953-14499277 | 1.15377               | 0.0562215             | -4.35909              | 0.00245            | 1.24434               | 0.278688              | -2.15865              | 0.00085  |
| ENSG00000170558 | CDH2         | 18:25530929-25757410 | 20.4645               | 65.6665               | 1.68203               | 5.00E-05           | 22.0624               | 72.6712               | 1.7198                | 5.00E-05 |
| ENSG00000158270 | COLEC12      | 18:319360-500722     | 1.24111               | 8.11346               | 2.70869               | 5.00E-05           | 1.33683               | 6.72                  | 2.32964               | 5.00E-05 |
| ENSG00000152229 | PSTPIP2      | 18:43563501-43652238 | 1.44991               | 4.50766               | 1.63641               | 5.00E-05           | 1.56319               | 3.12854               | 1.001                 | 0.00705  |
| ENSG00000198796 | ALPK2        | 18:56148478-56296189 | 0.2662                | 1.41302               | 2.4082                | 5.00E-05           | 0.286805              | 3.34163               | 3.54241               | 5.00E-05 |
| ENSG00000141682 | PMAIP1       | 18:57567179-57571538 | 78.0662               | 45.7894               | -0.769686             | 5.00E-05           | 84.193                | 54.8931               | -0.617074             | 0.0079   |
| ENSG00000173482 | PTPRM        | 18:7566779-8406951   | 2.94374               | 9.31805               | 1.66238               | 5.00E-05           | 3.17203               | 7.89706               | 1.31591               | 0.0001   |
| ENSG00000213339 | QTRT1        | 19:10812105-10824113 | 28.6725               | 18.9965               | -0.593931             | 0.0081             | 30.8265               | 16.8535               | -0.871123             | 0.00175  |
| ENSG00000130176 | CNIN1        | 19:11649531-11661138 | 11.5603               | 33.2595               | 1.52459               | 5.00E-05           | 12.4348               | 26.0772               | 1.06841               | 0.0044   |
| ENSG00000130513 | GDF15        | 19:18485540-18499986 | 0.920474              | 8.2025                | 3.15561               | 5.00E-05           | 0.988045              | 9.5151                | 3.26757               | 5.00E-05 |

Continued

Supplementary Table SX Continued

| Gene id         | Gene        | Locus                 | ips-KS2 vs ips-HM1 |                   |                    | ips-KS2 vs ips-HM2 |                   |                   |                    |          |
|-----------------|-------------|-----------------------|--------------------|-------------------|--------------------|--------------------|-------------------|-------------------|--------------------|----------|
|                 |             |                       | Avg-value-ips-KS2  | Avg-value-ips-HM1 | log2 (fold_change) | p_value            | Avg-value-ips-KS2 | Avg-value-ips-HM2 | log2 (fold_change) | p_value  |
| ENSG00000172687 | ZNF738      | 19:21541731-21562104  | 82.0138            | 45.7405           | -0.842396          | 5.00E-05           | 88.4067           | 47.8092           | -0.886868          | 0.00045  |
| ENSG00000004777 | ARHGAP33    | 19:36265433-36279724  | 6.83078            | 3.49088           | -0.968459          | 0.0004             | 7.34787           | 3.97277           | -0.88718           | 0.00695  |
| ENSG00000161281 | COX7A1      | 19:36641823-36643771  | 0.431152           | 2.08472           | 2.27359            | 0.0005             | 0.463528          | 1.66368           | 1.84365            | 0.00495  |
| ENSG00000129946 | SHC2        | 19:416582-460996      | 0.94578            | 1.98378           | 1.06868            | 0.00385            | 1.01792           | 2.35754           | 1.21167            | 0.00955  |
| ENSG00000105246 | EBI3        | 19:4229494-4237528    | 0.27246            | 2.3847            | 3.1297             | 5.00E-05           | 0.29294           | 1.56382           | 2.4164             | 0.00075  |
| ENSG00000167680 | SEMA6B      | 19:4542599-4559820    | 14.5466            | 9.52982           | -0.610165          | 0.00635            | 15.6487           | 8.81334           | -0.828282          | 0.00855  |
| ENSG00000105499 | PLA2G4C     | 19:48551099-48614074  | 9.16404            | 4.49254           | -1.02845           | 0.00125            | 9.8725            | 4.63716           | -1.09018           | 0.00585  |
| ENSG00000142227 | EMP3        | 19:48799713-48833810  | 11.8105            | 33.0499           | 1.48458            | 5.00E-05           | 12.7132           | 25.852            | 1.02395            | 0.00965  |
| ENSG00000105357 | MYH14       | 19:50691442-50813802  | 5.14913            | 3.06734           | -0.747338          | 0.00445            | 5.54256           | 0.108385          | -5.67631           | 5.00E-05 |
| ENSG00000189190 | ZNF600      | 19:53267447-53290044  | 1.75991            | 7.09505           | 2.01131            | 5.00E-05           | 1.89725           | 5.20033           | 1.45469            | 0.00145  |
| ENSG00000167785 | ZNF558      | 19:8920379-8943004    | 6.94662            | 11.874            | 0.773428           | 0.0004             | 7.48756           | 14.6901           | 0.972277           | 0.00065  |
| ENSG00000144063 | MALL        | 2:110841446-110874143 | 3.45053            | 1.42854           | -1.27227           | 0.00725            | 3.71455           | 1.34703           | -1.4634            | 0.00355  |
| ENSG00000172965 | MIR4435-1HG | 2:111953539-112268567 | 15.5027            | 42.2303           | 1.44576            | 5.00E-05           | 16.7049           | 44.1759           | 1.40299            | 0.00115  |
| ENSG00000121966 | CXCR4       | 2:136871918-136875735 | 1.216              | 7.66615           | 2.65636            | 5.00E-05           | 1.31093           | 8.44057           | 2.68675            | 5.00E-05 |
| ENSG00000169554 | ZEB2        | 2:145141647-145282147 | 0.324023           | 1.1347            | 1.80815            | 5.00E-05           | 0.349125          | 1.75394           | 2.32878            | 5.00E-05 |
| ENSG00000128683 | GADI        | 2:171669722-171717661 | 0.575906           | 1.79227           | 1.63788            | 0.0023             | 0.620218          | 2.16696           | 1.80482            | 0.0058   |
| ENSG00000138448 | ITGAV       | 2:187454791-187630685 | 19.1492            | 44.9734           | 1.23179            | 5.00E-05           | 20.6575           | 43.6817           | 1.08037            | 0.00025  |
| ENSG00000003436 | TFPI        | 2:187866602-188430487 | 2.50283            | 13.9309           | 2.47666            | 5.00E-05           | 2.69833           | 12.433            | 2.20403            | 0.0001   |
| ENSG00000168542 | COL3A1      | 2:189839045-189877472 | 1.00076            | 31.3628           | 4.96989            | 5.00E-05           | 1.07826           | 19.6302           | 4.1863             | 5.00E-05 |

Continued

Supplementary Table SX Continued

| Gene id         | Gene              | Locus                     | ips-KS2 vs iPS-HMI    |                       |                       | ips-KS2 vs ips-HM2 |                       |                       |                       |          |
|-----------------|-------------------|---------------------------|-----------------------|-----------------------|-----------------------|--------------------|-----------------------|-----------------------|-----------------------|----------|
|                 |                   |                           | Avg-value-<br>ips-KS2 | Avg-value-<br>ips-HMI | log2<br>(fold_change) | p_value            | Avg-value-<br>ips-KS2 | Avg-value-<br>ips-HM2 | log2<br>(fold_change) | p_value  |
| ENSG00000204262 | COL5A2            | 2:189896621-<br>190044605 | 11.3944               | 30.9626               | 1.4422                | 5.00E-05           | 12.2772               | 29.6556               | 1.27233               | 5.00E-05 |
| ENSG00000132031 | MATN3             | 2:20189977-<br>20212455   | 3.78969               | 13.4153               | 1.82373               | 5.00E-05           | 4.08462               | 9.8318                | 1.26725               | 0.00015  |
| ENSG00000143878 | RHOB              | 2:20646834-<br>20649200   | 5.05535               | 15.133                | 1.58181               | 5.00E-05           | 5.44134               | 13.2577               | 1.2848                | 5.00E-05 |
| ENSG00000115414 | FN1               | 2:216225162-<br>216300895 | 37.9862               | 282.107               | 2.8927                | 5.00E-05           | 40.9216               | 264.897               | 2.6945                | 5.00E-05 |
| ENSG00000115461 | IGFBP5            | 2:217536827-<br>217858802 | 2.22225               | 3.92855               | 0.821973              | 0.00095            | 2.39269               | 15.6248               | 2.70713               | 5.00E-05 |
| ENSG00000135919 | SERPINE2          | 2:224839828-<br>224904036 | 43.2902               | 122.28                | 1.49807               | 5.00E-05           | 46.6574               | 75.0343               | 0.685443              | 0.0048   |
| ENSG00000244280 | ECELIP2           | 2:233250459-<br>233252167 | 0.623618              | 2.28675               | 1.87457               | 0.00015            | 0.67163               | 2.45491               | 1.86993               | 0.0017   |
| ENSG00000168918 | INPP5D            | 2:233924676-<br>234116549 | 3.19805               | 6.29754               | 0.977597              | 5.00E-05           | 3.44234               | 6.56872               | 0.932223              | 0.0004   |
| ENSG00000075426 | FOSL2             | 2:28607275-<br>28640179   | 0.620467              | 2.0285                | 1.70899               | 5.00E-05           | 0.668118              | 2.24546               | 1.74883               | 0.00015  |
| ENSG00000068781 | STON1-<br>GTF2AIL | 2:48756521-<br>49003654   | 0.00837146            | 1.99407               | 7.89602               | 0.0008             | 0.0090312             | 3.83572               | 8.73037               | 0.003    |
| ENSG00000115902 | SLC1A4            | 2:65215610-<br>65250999   | 0.395295              | 2.88437               | 2.86725               | 5.00E-05           | 0.425897              | 2.03683               | 2.25775               | 5.00E-05 |
| ENSG00000163017 | ACTG2             | 2:74119440-<br>74146992   | 5.31005               | 21.6283               | 2.02612               | 5.00E-05           | 5.71662               | 19.0317               | 1.73517               | 5.00E-05 |
| ENSG00000222041 | LINC00152         | 2:87754886-<br>87906324   | 12.3324               | 46.6186               | 1.91846               | 5.00E-05           | 13.2877               | 37.2864               | 1.48856               | 0.00035  |
| ENSG00000125848 | FLRT3             | 20:13829892-<br>16033842  | 1.23787               | 3.15348               | 1.34909               | 0.00065            | 1.33537               | 6.07457               | 2.18554               | 5.00E-05 |
| ENSG00000170373 | CST1              | 20:23728189-<br>23731905  | 3.36954               | 81.4968               | 4.59612               | 5.00E-05           | 3.62856               | 209.022               | 5.84812               | 5.00E-05 |
| ENSG00000101003 | GIN51             | 20:25388362-<br>25433264  | 38.0563               | 22.7806               | -0.740331             | 0.00015            | 41.0514               | 25.4504               | -0.689741             | 0.00235  |
| ENSG00000198959 | TGM2              | 20:36756862-<br>36794980  | 0.454003              | 4.81229               | 3.40595               | 5.00E-05           | 0.488741              | 5.98291               | 3.61371               | 5.00E-05 |
| ENSG00000124143 | ARHGAP40          | 20:37230576-<br>37279678  | 0.107885              | 1.49167               | 3.78936               | 5.00E-05           | 0.116091              | 1.36287               | 3.55333               | 5.00E-05 |
| ENSG00000101220 | C20orf27          | 20:3734154-<br>3749034    | 36.775                | 23.1912               | -0.665146             | 0.00205            | 39.5651               | 23.945                | -0.724509             | 0.00875  |

Continued

**Supplementary Table SX Continued**

| Gene id          | Gene         | Locus                 | ips-KS2 vs ips-HM1 |                   |                    | ips-KS2 vs ips-HM2 |                   |                   |                    |          |
|------------------|--------------|-----------------------|--------------------|-------------------|--------------------|--------------------|-------------------|-------------------|--------------------|----------|
|                  |              |                       | Avg-value-ips-KS2  | Avg-value-ips-HM1 | log2 (fold_change) | p_value            | Avg-value-ips-KS2 | Avg-value-ips-HM2 | log2 (fold_change) | p_value  |
| ENSG00000132646  | PCNA         | 20:5095598-5107272    | 230.652            | 148.03            | -0.639829          | 5.00E-05           | 248.541           | 164.868           | -0.592177          | 0.0084   |
| ENSG00000125872  | LRRN4        | 20:6021423-6034695    | 0.288039           | 2.46779           | 3.09888            | 5.00E-05           | 0.309611          | 1.41057           | 2.18775            | 0.00025  |
| ENSG00000101198  | NKAIN4       | 20:61872135-61904046  | 2.06333            | 4.81476           | 1.22249            | 5.00E-05           | 2.22071           | 7.29758           | 1.7164             | 5.00E-05 |
| ENSG00000228592  | AF000459.4   | 21:24733425-24757182  | 10.9904            | 3.49968           | -1.65094           | 5.00E-05           | 11.8659           | 0.911037          | -3.70316           | 5.00E-05 |
| ENSG00000154734  | ADAMTS1      | 21:28208065-28217728  | 6.39343            | 21.3361           | 1.73863            | 5.00E-05           | 6.8903            | 14.7437           | 1.09746            | 0.0002   |
| ENSG00000154736  | ADAMTS5      | 21:28261694-28338832  | 0.307242           | 2.23517           | 2.86294            | 5.00E-05           | 0.331381          | 1.77712           | 2.42298            | 5.00E-05 |
| ENSG00000156253  | RWDD2B       | 21:30376704-30391699  | 12.0628            | 3.60486           | -1.74256           | 5.00E-05           | 13.0108           | 6.91954           | -0.910963          | 0.0038   |
| ENSG00000159079  | C21orf59     | 21:33948861-33985176  | 39.2115            | 24.5971           | -0.672791          | 0.0009             | 42.2116           | 26.0414           | -0.696829          | 0.00495  |
| ENSG00000184012  | TMPRSS2      | 21:42836477-42903043  | 8.26957            | 3.05281           | -1.43767           | 5.00E-05           | 8.90684           | 4.74025           | -0.909951          | 0.00145  |
| ENSG00000100033  | PRODH        | 22:18893540-18924066  | 7.34023            | 44.3609           | 2.59539            | 5.00E-05           | 7.89852           | 19.0042           | 1.26667            | 0.00095  |
| ENSG00000260065  | CTA-445C9.15 | 22:26917948-26921002  | 4.81872            | 2.76274           | -0.802553          | 0.00135            | 5.19708           | 2.21337           | -1.23146           | 0.0008   |
| ENSG00000100122  | CRYBB1       | 22:26995241-27014052  | 2.12384            | 0.601774          | -1.81938           | 5.00E-05           | 2.28565           | 0.590583          | -1.95239           | 0.00085  |
| ENSG00000128283  | CDC42EP1     | 22:37956453-37965412  | 1.41694            | 4.18748           | 1.5633             | 5.00E-05           | 1.52374           | 3.70489           | 1.28182            | 0.00295  |
| ENSG00000100097  | LGALS1       | 22:38071614-38075813  | 19.4504            | 34.3517           | 0.820578           | 0.00095            | 20.93             | 49.8986           | 1.25342            | 0.0001   |
| ENSG00000100311  | PDGFB        | 22:39619363-39640756  | 0.7293             | 3.05251           | 2.06541            | 5.00E-05           | 0.78468           | 2.92298           | 1.89726            | 5.00E-05 |
| ENSG000000091986 | CCDC80       | 3:112323406-112368377 | 3.54708            | 16.5016           | 2.2179             | 5.00E-05           | 3.82183           | 7.75521           | 1.0209             | 0.0053   |
| ENSG00000163430  | FSTL1        | 3:12011139-120170100  | 102.894            | 163.998           | 0.672512           | 0.0049             | 110.833           | 188.713           | 0.76781            | 0.00625  |
| ENSG00000174640  | SLCO2A1      | 3:133651539-133771028 | 0.798757           | 3.66587           | 2.19833            | 5.00E-05           | 0.859783          | 3.46694           | 2.01162            | 5.00E-05 |
| ENSG00000152952  | PLOD2        | 3:145781828-145881440 | 13.5591            | 22.4955           | 0.730374           | 5.00E-05           | 14.6299           | 23.9394           | 0.710469           | 0.0036   |

Continued

**Supplementary Table SX Continued**

| Gene id         | Gene    | Locus                 | ips-KS2 vs ips-HMI    |                       |                       | ips-KS2 vs ips-HM2 |                       |                       |                       |          |
|-----------------|---------|-----------------------|-----------------------|-----------------------|-----------------------|--------------------|-----------------------|-----------------------|-----------------------|----------|
|                 |         |                       | Avg-value-<br>ips-KS2 | Avg-value-<br>ips-HMI | log2<br>(fold_change) | p_value            | Avg-value-<br>ips-KS2 | Avg-value-<br>ips-HM2 | log2<br>(fold_change) | p_value  |
| ENSG00000169908 | TM4SF1  | 3:149086808-149104370 | 1.2252                | 3.55562               | 1.53709               | 5.00E-05           | 1.32115               | 9.26921               | 2.81065               | 5.00E-05 |
| ENSG00000013297 | CLDN11  | 3:170136652-170578169 | 1.76626               | 9.17575               | 2.37713               | 5.00E-05           | 1.90325               | 5.45285               | 1.51855               | 0.00105  |
| ENSG00000163584 | RPL22L1 | 3:170582663-170588272 | 246.539               | 133.728               | -0.88252              | 0.0001             | 265.781               | 144.378               | -0.880388             | 0.0034   |
| ENSG00000172667 | ZMAT3   | 3:178735010-178790067 | 1.96184               | 7.42713               | 1.9206                | 5.00E-05           | 2.11639               | 3.89375               | 0.879555              | 0.00785  |
| ENSG00000145012 | LPP     | 3:187868993-188608460 | 5.58354               | 17.6493               | 1.66036               | 5.00E-05           | 6.02095               | 12.5237               | 1.0566                | 0.0014   |
| ENSG00000114315 | HES1    | 3:193853933-193856521 | 1.97017               | 5.36132               | 1.44427               | 5.00E-05           | 2.12038               | 6.32808               | 1.57745               | 5.00E-05 |
| ENSG00000114270 | COL7A1  | 3:48601505-48632700   | 3.24902               | 18.0279               | 2.47215               | 5.00E-05           | 3.49706               | 13.1988               | 1.91619               | 0.0021   |
| ENSG00000134107 | BHLHE40 | 3:4938492-5027008     | 0.602773              | 4.00329               | 2.7315                | 5.00E-05           | 0.649134              | 5.61167               | 3.11184               | 5.00E-05 |
| ENSG00000164076 | CAMKV   | 3:49895420-49907655   | 50.8519               | 27.6932               | -0.876773             | 0.0008             | 54.7416               | 22.105                | -1.30826              | 5.00E-05 |
| ENSG00000114854 | TNNC1   | 3:52485117-52488086   | 3.45504               | 6.59982               | 0.933723              | 0.00185            | 3.71913               | 9.73205               | 1.38778               | 0.0005   |
| ENSG00000163638 | ADAMTS9 | 3:64501332-64997143   | 0.251705              | 1.34714               | 2.4201                | 5.00E-05           | 0.271519              | 1.60851               | 2.5666                | 0.0002   |
| ENSG00000144749 | LRIG1   | 3:66119284-66551687   | 50.3354               | 19.7937               | -1.34653              | 5.00E-05           | 54.2096               | 34.8097               | -0.63906              | 0.00785  |
| ENSG00000206538 | VGLL3   | 3:86987118-87040269   | 2.13154               | 4.95065               | 1.21572               | 5.00E-05           | 2.30038               | 4.81435               | 1.06547               | 0.00095  |
| ENSG00000144810 | COL8A1  | 3:99357318-99518070   | 0.735886              | 3.0173                | 2.03571               | 0.0006             | 0.792992              | 9.46833               | 3.57773               | 5.00E-05 |
| ENSG00000145349 | CAMK2D  | 4:114372187-114683083 | 3.22807               | 7.27878               | 1.17302               | 5.00E-05           | 3.4816                | 9.48298               | 1.44559               | 0.00025  |
| ENSG00000138650 | PCDH10  | 4:134070469-134129356 | 1.06989               | 5.98825               | 2.48468               | 5.00E-05           | 1.15254               | 5.92666               | 2.36241               | 5.00E-05 |
| ENSG00000137449 | CFEB2   | 4:15004297-15447790   | 0.69755               | 1.9432                | 1.47806               | 0.0001             | 0.752562              | 1.79396               | 1.25327               | 0.00515  |
| ENSG00000151962 | RBM46   | 4:155675907-155749965 | 0.457294              | 3.66008               | 3.00068               | 5.00E-05           | 0.493276              | 1.72433               | 1.80557               | 0.0015   |
| ENSG00000145431 | PDGFC   | 4:157681605-157892546 | 1.8701                | 3.43466               | 0.877051              | 0.0065             | 2.0156                | 6.81572               | 1.75766               | 5.00E-05 |

Continued

Supplementary Table SX Continued

| Gene id         | Gene    | Locus                 | ips-KS2 vs ips-HMI    |                       |                       | ips-KS2 vs ips-HM2 |                       |                       |                       |          |
|-----------------|---------|-----------------------|-----------------------|-----------------------|-----------------------|--------------------|-----------------------|-----------------------|-----------------------|----------|
|                 |         |                       | Avg-value-<br>ips-KS2 | Avg-value-<br>ips-HMI | log2<br>(fold_change) | p_value            | Avg-value-<br>ips-KS2 | Avg-value-<br>ips-HM2 | log2<br>(fold_change) | p_value  |
| ENSG00000164125 | FAM198B | 4:159045625-159176563 | 0.160853              | 2.72202               | 4.08087               | 5.00E-05           | 0.173425              | 5.70217               | 5.03913               | 0.00985  |
| ENSG00000164120 | HPGD    | 4:175411327-175444305 | 1.01052               | 6.25184               | 2.62918               | 5.00E-05           | 1.09068               | 2.97453               | 1.44744               | 0.00175  |
| ENSG00000154553 | PDLIM3  | 4:186422850-186456766 | 1.84711               | 4.67653               | 1.34017               | 5.00E-05           | 1.98932               | 7.5323                | 1.92081               | 5.00E-05 |
| ENSG00000145147 | SLIT2   | 4:20254882-20622184   | 1.8674                | 3.46235               | 0.890722              | 0.0004             | 2.01324               | 3.62686               | 0.849206              | 0.008    |
| ENSG00000064042 | LIMCH1  | 4:41361623-41702061   | 1.57858               | 8.22272               | 2.38099               | 5.00E-05           | 1.70118               | 4.64119               | 1.44796               | 0.001    |
| ENSG00000163071 | SPATA18 | 4:52917496-52963458   | 0.558696              | 1.8043                | 1.69131               | 0.0006             | 0.60242               | 1.47761               | 1.29442               | 0.00585  |
| ENSG00000197701 | ZNF595  | 4:53178-88099         | 15.9187               | 8.03232               | -0.986832             | 0.0052             | 17.1557               | 6.6889                | -1.35885              | 0.0003   |
| ENSG00000163735 | CXCL5   | 4:74861358-74864496   | 31.3668               | 10.7727               | -1.54185              | 5.00E-05           | 33.8392               | 12.5986               | -1.42544              | 5.00E-05 |
| ENSG00000169116 | PARM1   | 4:75858304-75975325   | 1.67331               | 6.8416                | 2.03163               | 5.00E-05           | 1.80396               | 3.87888               | 1.10448               | 0.0006   |
| ENSG00000138772 | ANXA3   | 4:79472672-79531597   | 12.0394               | 46.4562               | 1.94811               | 5.00E-05           | 12.9768               | 30.5451               | 1.23501               | 5.00E-05 |
| ENSG00000163624 | CDS1    | 4:85504131-85572491   | 11.2597               | 6.64959               | -0.759826             | 0.00015            | 12.1446               | 7.2799                | -0.73833              | 0.0049   |
| ENSG00000118785 | SPP1    | 4:88896818-88904562   | 30.5599               | 259.215               | 3.08444               | 5.00E-05           | 32.9387               | 122.462               | 1.89448               | 5.00E-05 |
| ENSG00000152208 | GRID2   | 4:93225549-94695707   | 31.3415               | 16.4247               | -0.93221              | 5.00E-05           | 33.7879               | 14.6317               | -1.20741              | 5.00E-05 |
| ENSG00000113083 | LOX     | 5:121297655-121413980 | 0.890882              | 5.81252               | 2.70586               | 5.00E-05           | 0.960827              | 7.80639               | 3.02231               | 0.0007   |
| ENSG00000138829 | FBN2    | 5:127593600-128369335 | 5.41848               | 17.0584               | 1.65453               | 5.00E-05           | 5.83794               | 19.4638               | 1.73726               | 5.00E-05 |
| ENSG00000072682 | P4HA2   | 5:131520568-131731306 | 2.9068                | 8.50149               | 1.54828               | 5.00E-05           | 3.13097               | 11.3335               | 1.85591               | 5.00E-05 |
| ENSG00000120708 | TGFBI   | 5:135364583-135399507 | 6.0907                | 33.5153               | 2.46014               | 5.00E-05           | 6.5653                | 16.5867               | 1.3371                | 5.00E-05 |
| ENSG00000120738 | EGR1    | 5:137801178-137805004 | 2.04743               | 7.33532               | 1.84105               | 5.00E-05           | 2.20727               | 12.2851               | 2.47658               | 5.00E-05 |
| ENSG00000113070 | HBEGF   | 5:139712427-139726216 | 1.92865               | 3.69722               | 0.938846              | 0.0003             | 2.07789               | 7.12937               | 1.77866               | 5.00E-05 |

Continued

Supplementary Table SX Continued

| Gene id         | Gene    | Locus                     | ips-KS2 vs ips-HMI    |                       |                       | ips-KS2 vs ips-HM2 |                       |                       |                       |          |
|-----------------|---------|---------------------------|-----------------------|-----------------------|-----------------------|--------------------|-----------------------|-----------------------|-----------------------|----------|
|                 |         |                           | Avg-value-<br>ips-KS2 | Avg-value-<br>ips-HMI | log2<br>(fold_change) | p_value            | Avg-value-<br>ips-KS2 | Avg-value-<br>ips-HM2 | log2<br>(fold_change) | p_value  |
| ENSG00000156453 | PCDH1   | 5:141232937-<br>141258811 | 65.2248               | 41.9071               | -0.638226             | 0.00025            | 70.2169               | 34.597                | -1.02117              | 5.00E-05 |
| ENSG00000156475 | PPP2R2B | 5:145942788-<br>146464347 | 19.2091               | 12.5231               | -0.617192             | 0.00415            | 20.695                | 11.4865               | -0.849335             | 0.00185  |
| ENSG00000171992 | SYNPO   | 5:149980641-<br>150038782 | 0.67668               | 2.63894               | 1.96341               | 5.00E-05           | 0.728437              | 3.37648               | 2.21264               | 5.00E-05 |
| ENSG00000113140 | SPARC   | 5:151040656-<br>151104343 | 292.686               | 776.779               | 1.40815               | 5.00E-05           | 315.139               | 601.398               | 0.932333              | 0.0055   |
| ENSG00000184347 | SLIT3   | 5:168081517-<br>168728133 | 0.389928              | 1.66997               | 2.09854               | 0.0007             | 0.419586              | 1.24497               | 1.56907               | 0.00875  |
| ENSG00000170089 | RPI1    | 5:177236407-<br>177410055 | 11.6008               | 7.53577               | -0.622393             | 0.0077             | 12.4957               | 7.30798               | -0.773882             | 0.0099   |
| ENSG00000113361 | CDH6    | 5:31094083-<br>31329253   | 3.16613               | 5.85718               | 0.887485              | 0.00995            | 3.41215               | 15.7453               | 2.20617               | 5.00E-05 |
| ENSG00000134352 | IL6ST   | 5:55230922-<br>55290821   | 2.20107               | 5.89538               | 1.42138               | 5.00E-05           | 2.37656               | 4.59368               | 0.950777              | 0.00835  |
| ENSG00000145632 | PLK2    | 5:57749808-<br>57756087   | 6.91493               | 39.0019               | 2.49576               | 5.00E-05           | 7.45089               | 25.2483               | 1.7607                | 5.00E-05 |
| ENSG00000254353 | RPI1    | 5:70328994-<br>70330227   | 1.63878               | 4.01139               | 1.29148               | 0.0013             | 1.7662                | 6.44662               | 1.86789               | 0.001    |
| ENSG00000145736 | GTF2H2  | 5:70330783-<br>70363516   | 24.5006               | 11.5261               | -1.08791              | 5.00E-05           | 26.4456               | 11.9603               | -1.14478              | 0.00065  |
| ENSG00000176928 | GCNT4   | 5:74323288-<br>74326724   | 2.03588               | 21.2459               | 3.38346               | 5.00E-05           | 2.19699               | 10.4368               | 2.24808               | 5.00E-05 |
| ENSG00000145708 | CRHBP   | 5:76248537-<br>76276983   | 0.592174              | 6.08322               | 3.36074               | 5.00E-05           | 0.638493              | 2.03612               | 1.67308               | 0.0073   |
| ENSG00000132840 | BHMT2   | 5:78293437-<br>78531861   | 0.142077              | 1.35488               | 3.25341               | 0.0016             | 0.153116              | 1.12738               | 2.88028               | 0.0064   |
| ENSG00000145681 | HAPLN1  | 5:82933623-<br>83017432   | 5.44109               | 63.9767               | 3.55558               | 5.00E-05           | 5.86431               | 40.4238               | 2.78517               | 5.00E-05 |
| ENSG00000164292 | RHOBTB3 | 5:95036952-<br>95160087   | 3.10925               | 5.9937                | 0.94688               | 0.0008             | 3.35379               | 8.51239               | 1.34377               | 0.00025  |
| ENSG00000078401 | EDN1    | 6:12290595-<br>12297427   | 1.68599               | 11.1666               | 2.72753               | 5.00E-05           | 1.81698               | 9.30995               | 2.35723               | 5.00E-05 |
| ENSG00000118523 | CTGF    | 6:132269315-<br>132398533 | 91.7174               | 144.253               | 0.653332              | 0.0001             | 98.7663               | 182.319               | 0.884378              | 0.00325  |
| ENSG00000112414 | GPR126  | 6:142622990-<br>142767403 | 1.99594               | 5.39444               | 1.43441               | 5.00E-05           | 2.15203               | 6.07645               | 1.49753               | 5.00E-05 |

Continued

Supplementary Table SX Continued

| Gene id         | Gene      | Locus                 | ips-KS2 vs iPS-HMI |                   |                    | ips-KS2 vs ips-HM2 |                   |                   |                    |          |
|-----------------|-----------|-----------------------|--------------------|-------------------|--------------------|--------------------|-------------------|-------------------|--------------------|----------|
|                 |           |                       | Avg-value-ips-KS2  | Avg-value-ips-HMI | log2 (fold_change) | p_value            | Avg-value-ips-KS2 | Avg-value-ips-HM2 | log2 (fold_change) | p_value  |
| ENSG00000226673 | LINC01108 | 6:14280357-14285376   | 1.80588            | 77.1216           | 5.41636            | 5.00E-05           | 1.94594           | 10.0948           | 2.37508            | 5.00E-05 |
| ENSG00000112183 | RBM24     | 6:17281576-17294106   | 0.263112           | 1.06152           | 2.01238            | 0.00035            | 0.283677          | 2.12889           | 2.90778            | 5.00E-05 |
| ENSG00000180573 | HIST1H2AC | 6:26124372-26139344   | 12.9931            | 4.15666           | -1.64425           | 5.00E-05           | 14.0061           | 5.91305           | -1.24408           | 0.0007   |
| ENSG00000170542 | SERPINB9  | 6:2887499-2903514     | 16.2998            | 28.5186           | 0.807043           | 5.00E-05           | 17.5735           | 31.0115           | 0.819407           | 0.00115  |
| ENSG00000137331 | IER3      | 6:30710705-30712331   | 5.31441            | 18.0291           | 1.76235            | 5.00E-05           | 5.71806           | 20.6409           | 1.85191            | 5.00E-05 |
| ENSG00000234745 | HLA-B     | 6:31321648-31325414   | 16.8123            | 35.9813           | 1.09773            | 5.00E-05           | 18.0864           | 32.1003           | 0.82768            | 0.0022   |
| ENSG00000204472 | AIFI      | 6:31582960-31584798   | 17.0555            | 4.10634           | -2.05431           | 5.00E-05           | 18.3744           | 8.01246           | -1.19738           | 0.00585  |
| ENSG00000124762 | CDKN1A    | 6:36644304-36655116   | 3.67604            | 33.2624           | 3.17767            | 5.00E-05           | 3.95639           | 20.353            | 2.36299            | 5.00E-05 |
| ENSG00000112232 | KHDRBS2   | 6:62340137-62996132   | 2.45774            | 0.855975          | -1.52169           | 5.00E-05           | 2.64972           | 0.695711          | -1.92928           | 5.00E-05 |
| ENSG00000111799 | COL12A1   | 6:75794041-75915767   | 0.913497           | 11.8497           | 3.69731            | 5.00E-05           | 0.984227          | 10.1483           | 3.36611            | 5.00E-05 |
| ENSG00000112773 | FAM46A    | 6:82201155-82462491   | 1.04429            | 2.61724           | 1.32553            | 5.00E-05           | 1.12658           | 2.15093           | 0.933012           | 0.00955  |
| ENSG00000135318 | NTSE      | 6:86159808-86205500   | 0.54222            | 1.44077           | 1.40989            | 0.00015            | 0.584552          | 3.55447           | 2.60423            | 5.00E-05 |
| ENSG00000106366 | SERPINE1  | 7:100770369-100782547 | 4.03572            | 58.0724           | 3.84695            | 5.00E-05           | 4.34688           | 70.9352           | 4.02845            | 5.00E-05 |
| ENSG00000135269 | TES       | 7:115850546-116148595 | 18.0053            | 35.3679           | 0.974015           | 5.00E-05           | 19.4119           | 32.3632           | 0.737414           | 0.00755  |
| ENSG00000105974 | CAVI      | 7:116164838-116201233 | 13.1714            | 85.4734           | 2.69807            | 5.00E-05           | 14.1963           | 48.1668           | 1.76253            | 5.00E-05 |
| ENSG00000184408 | KCND2     | 7:119913721-120392568 | 3.7732             | 1.45803           | -1.37177           | 5.00E-05           | 4.06854           | 1.99068           | -1.03125           | 0.00425  |
| ENSG00000135248 | FAM71F1   | 7:128349114-128371797 | 0.908091           | 5.20021           | 2.51766            | 5.00E-05           | 0.978584          | 9.12448           | 3.22097            | 5.00E-05 |
| ENSG00000128591 | FLNC      | 7:128470430-128550773 | 2.9373             | 21.7771           | 2.89025            | 5.00E-05           | 3.16031           | 12.4201           | 1.97454            | 0.0034   |
| ENSG00000122786 | CALD1     | 7:134429002-134655479 | 74.7097            | 270.505           | 1.85629            | 5.00E-05           | 80.5448           | 168.64            | 1.06609            | 0.0006   |

Continued



Supplementary Table SX Continued

| Gene id         | Gene         | Locus                     | ips-KS2 vs iPS-HMI    |                                        |           | ips-KS2 vs ips-HM2 |                       |                                        |           |          |
|-----------------|--------------|---------------------------|-----------------------|----------------------------------------|-----------|--------------------|-----------------------|----------------------------------------|-----------|----------|
|                 |              |                           | Avg-value-<br>ips-KS2 | Avg-value-<br>iPS-HMI<br>(fold_change) | log2      | p_value            | Avg-value-<br>ips-KS2 | Avg-value-<br>ips-HM2<br>(fold_change) | log2      | p_value  |
| ENSG00000106538 | RARRES2      | 7:150035407-<br>150038763 | 70.0058               | 34.1052                                | -1.03748  | 5.00E-05           | 75.2994               | 42.8225                                | -0.814271 | 0.0023   |
| ENSG00000122691 | TWIST1       | 7:19060613-<br>19157295   | 0.0899663             | 2.1458                                 | 4.57599   | 0.0042             | 0.0967533             | 1.10778                                | 3.51721   | 0.00195  |
| ENSG00000105926 | MPP6         | 7:24612886-<br>24733812   | 33.8245               | 19.8486                                | -0.769033 | 0.00045            | 36.4686               | 20.2035                                | -0.852054 | 0.0016   |
| ENSG00000146592 | CREB5        | 7:28338939-<br>28865511   | 0.577512              | 3.82334                                | 2.72691   | 5.00E-05           | 0.621357              | 2.84346                                | 2.19415   | 0.00015  |
| ENSG00000164619 | BMPER        | 7:33944522-<br>34195484   | 0.244671              | 3.31531                                | 3.76023   | 5.00E-05           | 0.263679              | 2.29915                                | 3.12424   | 5.00E-05 |
| ENSG00000106631 | MYL7         | 7:44178462-<br>44180931   | 2.33874               | 19.8431                                | 3.08483   | 5.00E-05           | 2.51724               | 20.7116                                | 3.04052   | 5.00E-05 |
| ENSG00000146674 | IGFBP3       | 7:45951948-<br>45961473   | 10.9723               | 23.5972                                | 1.10475   | 5.00E-05           | 11.8208               | 38.6158                                | 1.70786   | 5.00E-05 |
| ENSG00000146648 | EGFR         | 7:55086713-<br>55324313   | 0.983733              | 1.5391                                 | 0.645749  | 0.00645            | 1.06006               | 1.89425                                | 0.837473  | 0.00755  |
| ENSG00000106153 | CHCHD2       | 7:56169261-<br>56174269   | 60.0706               | 1.96659                                | -4.93289  | 5.00E-05           | 64.6355               | 37.5857                                | -0.782141 | 0.00315  |
| ENSG00000122674 | CCZ1         | 7:5938355-<br>6010314     | 28.6589               | 13.5326                                | -1.08254  | 5.00E-05           | 30.891                | 10.9618                                | -1.4947   | 5.00E-05 |
| ENSG00000233369 | RPI1-396K3.1 | 7:72569032-<br>72619657   | 6.88155               | 3.54027                                | -0.958874 | 0.0001             | 7.41836               | 4.20818                                | -0.817903 | 0.0085   |
| ENSG00000075223 | SEMA3C       | 7:80371853-<br>80551675   | 1.24111               | 3.51388                                | 1.50143   | 0.00065            | 1.33762               | 8.20935                                | 2.6176    | 5.00E-05 |
| ENSG00000164692 | COL1A2       | 7:94023872-<br>94060544   | 37.7858               | 71.2441                                | 0.914926  | 0.0006             | 40.7267               | 99.2973                                | 1.28578   | 0.0006   |
| ENSG00000158560 | DYNC113      | 7:95401865-<br>95739634   | 0.445289              | 1.38562                                | 1.63771   | 0.00055            | 0.479846              | 1.7269                                 | 1.84755   | 0.0014   |
| ENSG00000164932 | CTHRC1       | 8:104383742-<br>104395225 | 2.586                 | 8.77186                                | 1.76216   | 5.00E-05           | 2.78564               | 10.5662                                | 1.92338   | 5.00E-05 |
| ENSG00000164761 | TNFRSF11B    | 8:119935795-<br>119964439 | 0.604945              | 2.03513                                | 1.75024   | 5.00E-05           | 0.652184              | 2.29157                                | 1.81299   | 0.0014   |
| ENSG00000170961 | HAS2         | 8:122624355-<br>122656933 | 0.847762              | 11.7581                                | 3.79385   | 5.00E-05           | 0.915347              | 7.63127                                | 3.05953   | 5.00E-05 |
| ENSG00000156802 | ATAD2        | 8:124332089-<br>124428590 | 14.6839               | 8.53274                                | -0.783151 | 5.00E-05           | 15.8365               | 8.85514                                | -0.838668 | 0.00055  |
| ENSG00000164741 | DLC1         | 8:12940869-<br>13373167   | 0.814436              | 2.66935                                | 1.71262   | 5.00E-05           | 0.877407              | 2.86413                                | 1.70678   | 0.0001   |

Continued

Supplementary Table SX Continued

| Gene id          | Gene         | Locus                 | ips-KS2 vs iPS-HMI |                   |                    | ips-KS2 vs ips-HM2 |                   |                   |                    |          |
|------------------|--------------|-----------------------|--------------------|-------------------|--------------------|--------------------|-------------------|-------------------|--------------------|----------|
|                  |              |                       | Avg-value-ips-KS2  | Avg-value-ips-HMI | log2 (fold_change) | p_value            | Avg-value-ips-KS2 | Avg-value-ips-HM2 | log2 (fold_change) | p_value  |
| ENSG00000253507  | CTD-250IM5.1 | 8:132320791-132329879 | 8.58242            | 37.6428           | 2.13292            | 5.00E-05           | 9.24664           | 25.2012           | 1.44649            | 5.00E-05 |
| ENSG00000132297  | HHLA1        | 8:133036466-133123406 | 2.33109            | 46.2503           | 4.31039            | 5.00E-05           | 2.51222           | 8.64328           | 1.78261            | 5.00E-05 |
| ENSG00000104419  | NDRG1        | 8:134249413-134314265 | 1.087              | 3.98466           | 1.87411            | 5.00E-05           | 1.1709            | 4.47704           | 1.93492            | 5.00E-05 |
| ENSG00000168487  | BMP1         | 8:22022248-22069839   | 1.74049            | 3.62175           | 1.0572             | 0.0005             | 1.87222           | 6.75337           | 1.85086            | 5.00E-05 |
| ENSG00000173535  | TNFRSF10C    | 8:22941867-22974950   | 1.98371            | 9.46226           | 2.25399            | 5.00E-05           | 2.13501           | 5.31045           | 1.31459            | 0.00075  |
| ENSG00000173530  | TNFRSF10D    | 8:22993100-23021543   | 6.96459            | 14.8299           | 1.0904             | 5.00E-05           | 7.50368           | 13.0897           | 0.802764           | 0.0042   |
| ENSG00000104725  | NIEFL        | 8:24808467-24814624   | 2.34981            | 4.87639           | 1.05327            | 5.00E-05           | 2.53062           | 5.85411           | 1.20996            | 0.0002   |
| ENSG00000120875  | DUSP4        | 8:29190580-29208185   | 0.681478           | 4.35302           | 2.67528            | 5.00E-05           | 0.733816          | 2.01716           | 1.45883            | 0.0001   |
| ENSG00000168615  | ADAM9        | 8:38854387-38962663   | 11.0482            | 19.4124           | 0.813162           | 5.00E-05           | 11.9167           | 19.8159           | 0.733672           | 0.0066   |
| ENSG00000029534  | ANK1         | 8:41510738-41754280   | 1.21123            | 3.02184           | 1.31895            | 5.00E-05           | 1.30314           | 2.48752           | 0.932719           | 0.0071   |
| ENSG00000019549  | SNAI2        | 8:49830248-49834299   | 0.404403           | 2.37246           | 2.55252            | 5.00E-05           | 0.435974          | 2.29228           | 2.39447            | 5.00E-05 |
| ENSG00000147601  | TERF1        | 8:73921098-73960357   | 572.332            | 267.67            | -1.09639           | 5.00E-05           | 617.495           | 346.257           | -0.834583          | 0.0023   |
| ENSG000000253252 | RP11-10A14.6 | 8:9037760-9040029     | 0                  | 4.42862           | inf                | 5.00E-05           | 0                 | 1.03622           | inf                | 0.0012   |
| ENSG000000248538 | RP11-10A14.5 | 8:9046520-9060364     | 0.275335           | 4.12148           | 3.90391            | 0.00035            | 0.296672          | 2.16434           | 2.86699            | 0.0009   |
| ENSG00000164951  | PDP1         | 8:94870034-94938294   | 5.60476            | 21.5799           | 1.94496            | 5.00E-05           | 6.04331           | 11.6299           | 0.944429           | 0.0017   |
| ENSG00000165124  | SVEP1        | 9:113127530-113342160 | 0.312539           | 1.41189           | 2.17551            | 5.00E-05           | 0.336846          | 1.013             | 1.58847            | 0.0005   |
| ENSG000000041982 | TNCC         | 9:117782805-117880536 | 2.22838            | 7.98919           | 1.84206            | 5.00E-05           | 2.39921           | 7.14017           | 1.5734             | 5.00E-05 |
| ENSG00000182752  | PAPPA        | 9:118916082-119164601 | 0.187802           | 1.79379           | 3.25573            | 5.00E-05           | 0.202252          | 4.14758           | 4.35804            | 5.00E-05 |
| ENSG00000136869  | TLR4         | 9:120466609-120479149 | 0.210091           | 1.10328           | 2.39271            | 5.00E-05           | 0.226533          | 1.34845           | 2.57351            | 5.00E-05 |

Continued

Supplementary Table SX Continued

| Gene id         | Gene          | Locus                     | ips-KS2 vs ips-HMI    |                       |                       | ips-KS2 vs ips-HM2 |                       |                       |                       |          |
|-----------------|---------------|---------------------------|-----------------------|-----------------------|-----------------------|--------------------|-----------------------|-----------------------|-----------------------|----------|
|                 |               |                           | Avg-value-<br>ips-KS2 | Avg-value-<br>ips-HMI | log2<br>(fold_change) | p_value            | Avg-value-<br>ips-KS2 | Avg-value-<br>ips-HM2 | log2<br>(fold_change) | p_value  |
| ENSG00000130635 | COL5A1        | 9:137533619-<br>137736686 | 3.33049               | 18.3844               | 2.46468               | 5.00E-05           | 3.58412               | 21.3192               | 2.57246               | 5.00E-05 |
| ENSG00000197355 | UAP1L1        | 9:139971952-<br>139978991 | 0.606775              | 4.57521               | 2.9146                | 5.00E-05           | 0.652786              | 2.2364                | 1.7765                | 0.0003   |
| ENSG00000147869 | CER1          | 9:14719721-<br>14722715   | 1.84563               | 24.2891               | 3.71812               | 5.00E-05           | 1.98795               | 20.7551               | 3.38411               | 5.00E-05 |
| ENSG00000269900 | RMRP          | 9:35657747-<br>35658015   | 26.0247               | 7.66947               | -1.76268              | 0.00025            | 28.0456               | 8.34011               | -1.74964              | 0.00985  |
| ENSG00000237357 | RF11-475124.3 | 9:44400716-<br>44404440   | 1.02076               | 0.133668              | -2.93292              | 5.00E-05           | 1.1001                | 0.231759              | -2.24694              | 0.0009   |
| ENSG00000135046 | ANXA1         | 9:75766672-<br>75785309   | 6.89257               | 94.2297               | 3.77307               | 5.00E-05           | 7.42871               | 60.2759               | 3.0204                | 5.00E-05 |
| ENSG00000156049 | GNA14         | 9:80037994-<br>80263223   | 4.40563               | 12.9887               | 1.55984               | 5.00E-05           | 4.74616               | 10.3516               | 1.12502               | 0.00165  |
| ENSG00000135070 | ISCA1         | 9:88879460-<br>88897676   | 41.8408               | 25.7896               | -0.698121             | 0.0002             | 45.1345               | 27.4581               | -0.716997             | 0.00365  |
| ENSG00000130222 | GADD45G       | 9:92219927-<br>9221470    | 6.46598               | 1.166                 | -2.4713               | 5.00E-05           | 6.95156               | 2.49177               | -1.48016              | 0.00215  |
| ENSG00000133169 | BEX1          | X:102317578-<br>102319168 | 79.5155               | 45.6565               | -0.800416             | 0.0001             | 85.6322               | 49.1935               | -0.799686             | 0.0017   |
| ENSG00000204065 | TCEAL5        | X:102528618-<br>102531800 | 7.22086               | 3.65137               | -0.983732             | 0.00015            | 7.77663               | 4.08035               | -0.930451             | 0.0073   |
| ENSG00000133134 | BEX2          | X:102564273-<br>102565974 | 51.3975               | 26.2421               | -0.969817             | 5.00E-05           | 55.357                | 32.3848               | -0.773447             | 0.004    |
| ENSG00000123560 | PLP1          | X:103028646-<br>103047548 | 46.3537               | 23.4755               | -0.981529             | 5.00E-05           | 49.9903               | 23.6116               | -1.08215              | 5.00E-05 |
| ENSG00000123575 | FAM199X       | X:103411300-<br>103440583 | 14.0487               | 8.9738                | -0.646649             | 0.00465            | 15.1588               | 7.97634               | -0.926352             | 0.0007   |
| ENSG00000101935 | AMMECRI       | X:109437413-<br>109699562 | 19.0622               | 11.7723               | -0.695328             | 0.00025            | 20.5671               | 12.2024               | -0.753178             | 0.0021   |
| ENSG00000077279 | DCX           | X:110537006-<br>110655603 | 1.71526               | 0.334761              | -2.35722              | 5.00E-05           | 1.8503                | 0.700751              | -1.40079              | 0.0002   |
| ENSG00000134602 | MST4          | X:131157292-<br>131209971 | 63.0283               | 41.7284               | -0.59497              | 0.0004             | 68.0058               | 43.8449               | -0.633249             | 0.00555  |
| ENSG00000223749 | MIR503HG      | X:133677366-<br>133680741 | 0.802826              | 2.2467                | 1.48465               | 0.00715            | 0.86457               | 2.94517               | 1.7683                | 0.0091   |
| ENSG00000169100 | SLC25A6       | X:1505044-<br>1511617     | 218.861               | 140.22                | -0.642327             | 0.0003             | 235.183               | 152.029               | -0.629432             | 0.00565  |

Continued

**Supplementary Table SX Continued**

| Gene id         | Gene    | Locus                 | ips-KS2 vs iPS-HM1 |                                 |           | ips-KS2 vs ips-HM2 |                                 |           |           |          |
|-----------------|---------|-----------------------|--------------------|---------------------------------|-----------|--------------------|---------------------------------|-----------|-----------|----------|
|                 |         |                       | Avg-value-ips-KS2  | Avg-value-ips-HM1 (fold_change) | p_value   | Avg-value-ips-KS2  | Avg-value-ips-HM2 (fold_change) | p_value   |           |          |
| ENSG0000011677  | GABRA3  | X:151307354-151619830 | 6.34072            | 2.67937                         | -1.24275  | 5.00E-05           | 6.83494                         | 2.80392   | -1.28548  | 5.00E-05 |
| ENSG00000182492 | BGN     | X:152710177-152775012 | 1.90384            | 7.62195                         | 2.00125   | 0.0001             | 2.04916                         | 9.90801   | 2.27356   | 0.0003   |
| ENSG00000130821 | SLC6A8  | X:152935184-152962048 | 32.9455            | 60.8098                         | 0.884223  | 0.00015            | 35.4638                         | 69.5426   | 0.971552  | 0.00015  |
| ENSG00000169249 | ZRSR2   | X:15808594-15841383   | 10.6098            | 5.37127                         | -0.982057 | 5.00E-05           | 11.4325                         | 5.58008   | -1.03478  | 0.00105  |
| ENSG00000182287 | API52   | X:15843928-15873054   | 188.781            | 82.6098                         | -1.19233  | 5.00E-05           | 203.784                         | 114.26    | -0.83472  | 0.00335  |
| ENSG00000047230 | CTPS2   | X:16606125-16731059   | 26.6139            | 14.6026                         | -0.865956 | 0.00015            | 28.7035                         | 15.6543   | -0.874668 | 0.001    |
| ENSG00000169895 | SYAPI   | X:16737754-16783459   | 12.2737            | 8.04671                         | -0.609101 | 0.001              | 13.2353                         | 7.28739   | -0.860915 | 0.00025  |
| ENSG00000197976 | AKAP17A | X:1710485-1721407     | 18.9011            | 11.9112                         | -0.66615  | 0.00055            | 20.3175                         | 10.9261   | -0.89494  | 0.0004   |
| ENSG00000182378 | PLCXDI  | X:192988-220023       | 38.3285            | 24.1176                         | -0.66833  | 0.0018             | 41.2501                         | 22.3603   | -0.883459 | 0.00055  |
| ENSG00000056998 | GYG2    | X:2746828-2800859     | 37.6952            | 20.6926                         | -0.865264 | 5.00E-05           | 40.5921                         | 20.3858   | -0.993634 | 5.00E-05 |
| ENSG00000102003 | SYF     | X:49044268-49058913   | 5.45728            | 3.17208                         | -0.782756 | 0.0033             | 5.87387                         | 2.69067   | -1.12635  | 0.0007   |
| ENSG00000146938 | NILGN4X | X:5758677-6146904     | 76.9984            | 30.2148                         | -1.34958  | 5.00E-05           | 82.9799                         | 34.8887   | -1.25     | 5.00E-05 |
| ENSG00000130021 | HDHDI   | X:6966960-7066231     | 28.3929            | 11.6832                         | -1.2811   | 5.00E-05           | 30.597                          | 15.5268   | -0.978632 | 0.0002   |
| ENSG00000196338 | NILGN3  | X:70364680-70391051   | 9.36228            | 4.87829                         | -0.940486 | 5.00E-05           | 10.0809                         | 5.73843   | -0.812895 | 0.00495  |
| ENSG00000229807 | XIST    | X:73012039-73072588   | 83.564             | 0.118778                        | -9.45846  | 5.00E-05           | 90.1464                         | 0.0272482 | -11.6919  | 5.00E-05 |
| ENSG00000011201 | KALI    | X:8496914-8700227     | 59.8436            | 35.1564                         | -0.76741  | 0.00605            | 64.5294                         | 25.2708   | -1.35249  | 5.00E-05 |
| ENSG00000186310 | NAP1L3  | X:92925928-92928567   | 51.7163            | 32.6614                         | -0.663033 | 0.0001             | 55.7831                         | 28.8473   | -0.951391 | 5.00E-05 |
